# Supplementary material
Source: MDPI journal article supplement (https://www.mdpi.com/2075-4701/14/3/337)

## checkCIF/PLATON report

Structure factors have been supplied for datablock(s) 202210171\_a

THIS REPORT IS FOR GUIDANCE ONLY. IF USED AS PART OF A REVIEW PROCEDURE FOR PUBLICATION, IT SHOULD NOT REPLACE THE EXPERTISE OF AN EXPERIENCED CRYSTALLOGRAPHIC REFEREE.

No syntax errors found. CIF dictionary Interpreting this report

**Datablock: 202210171 a**

|                 |                  |                    |              |
|-----------------|------------------|--------------------|--------------|
| Bond precision: | Al-Al = 0.0030 A | Wavelength=0.71073 |              |
| Cell:           | a=7.635(3)       | b=6.392(2)         | c=4.2007(14) |
|                 | alpha=90         | beta=90            | gamma=90     |
| Temperature:    | 300 K            |                    |              |

|                | Calculated   | Reported     |
|----------------|--------------|--------------|
| Volume         | 205.01(12)   | 205.01(12)   |
| Space group    | C m c m      | C m c m      |
| Hall group     | -C 2c 2      | -C 2c 2      |
| Moiety formula | Al11.44 Fe4  | ?            |
| Sum formula    | Al11.44 Fe4  | Al2.86 Fe    |
| Mr             | 532.05       | 132.98       |
| Dx, g cm-3     | 4.310        | 4.308        |
| Z              | 1            | 4            |
| Mu (mm-1)      | 8.087        | 8.087        |
| F000           | 252.7        | 253.0        |
| F000'          | 254.76       |              |
| h, k, lmax     | 9, 7, 4      | 9, 7, 4      |
| Nref           | 112          | 100          |
| Tmin, Tmax     | 0.564, 0.785 | 0.514, 0.746 |
| Tmin'          | 0.518        |              |

Correction method= # Reported T Limits: Tmin=0.514 Tmax=0.746  
AbsCorr = MULTI-SCAN

Data completeness= 0.893                      Theta (max)= 24.997

```
R(reflections)= 0.0363( 76)          wR2(reflections)=  
S = 1.017                        Npar= 19          0.0844( 100)
```

---

The following ALERTS were generated. Each ALERT has the format

**test-name\_ALERT\_alert-type\_alert-level.**

Click on the hyperlinks for more details of the test.

---

### Alert level A

PLAT029\_ALERT\_3\_A \_diffrn\_measured\_fraction\_theta\_full value Low . 0.893 Why?

Response: The high angle diffraction data are not very good since the structure is highly disordered.

PLAT088\_ALERT\_3\_A Poor Data / Parameter Ratio ..... 5.26 Note

Response: As the structure is highly disordered thus it requires more parameters to refine the model thus leads to a poor data/parameter ratio.

---

### Alert level B

PLAT911\_ALERT\_3\_B Missing FCF Refl Between Thmin & STh/L= 0.595 12 Report  
1 7 0, 3 7 0, 4 4 0, 8 0 0, 0 6 3, 1 5 3,  
2 4 3, 3 5 3, 0 4 4, 1 3 4, 2 4 4, 3 3 4,

Response: The missing FCF Refl(ections) Between Thmin & STh/L = 0.595 12 are caused by the poor high angle diffraction data, actually it has been checked manually that the above listed 12 reflection are too weak to be integrated and included in the solving and refining the structural model.

---

### Alert level C

ABSTY02\_ALERT\_1\_C An \_exptl\_absorpt\_correction\_type has been given without a literature citation. This should be contained in the \_exptl\_absorpt\_process\_details field.

Absorption correction given as multi-scan

CRYSC01\_ALERT\_1\_C The word below has not been recognised as a standard identifier.

drak

CRYSC01\_ALERT\_1\_C No recognised colour has been given for crystal colour.

PLAT077\_ALERT\_4\_C Unitcell Contains Non-integer Number of Atoms .. Please Check

PLAT213\_ALERT\_2\_C Atom Al2 has ADP max/min Ratio ..... 3.5 prolat

PLAT215\_ALERT\_3\_C Disordered All has ADP max/min Ratio ..... 3.5 Note

PLAT906\_ALERT\_3\_C Large K Value in the Analysis of Variance ..... 3.257 Check

---

### Alert level G

PLAT003\_ALERT\_2\_G Number of Uiso or Uij Restrained non-H Atoms ... 3 Report

PLAT004\_ALERT\_5\_G Polymeric Structure Found with Maximum Dimension 3 Info

PLAT045\_ALERT\_1\_G Calculated and Reported Z Differ by a Factor ... 0.250 Check

PLAT068\_ALERT\_1\_G Reported F000 Differs from Calcd (or Missing)... Please Check

PLAT171\_ALERT\_4\_G The CIF-Embedded .res File Contains EADP Records 1 Report

PLAT177\_ALERT\_4\_G The CIF-Embedded .res File Contains DELU Records 1 Report

PLAT186\_ALERT\_4\_G The CIF-Embedded .res File Contains ISOR Records 1 Report

PLAT301\_ALERT\_3\_G Main Residue Disorder .....(Resd 1) 43% Note

PLAT811\_ALERT\_5\_G No ADDSYM Analysis: Too Many Excluded Atoms .... ! Info

PLAT860\_ALERT\_3\_G Number of Least-Squares Restraints ..... 13 Note

PLAT883\_ALERT\_1\_G No Info/Value for \_atom\_sites\_solution\_primary . Please Do !

PLAT909\_ALERT\_3\_G Percentage of I>2sig(I) Data at Theta(Max) Still 80% Note

PLAT941\_ALERT\_3\_G Average HKL Measurement Multiplicity ..... 2.8 Low

PLAT963\_ALERT\_2\_G Both SHELXL WEIGHT Parameter Values Zero ..... Please Check

PLAT969\_ALERT\_5\_G The 'Henn et al.' R-Factor-gap value ..... 0.92 Note

Predicted wr2: Based on SigI\*\*2 9.21 or SHELX Weight 9.21

---

2 **ALERT level A** = Most likely a serious problem - resolve or explain

1 **ALERT level B** = A potentially serious problem, consider carefully

7 **ALERT level C** = Check. Ensure it is not caused by an omission or oversight

15 **ALERT level G** = General information/check it is not something unexpected

6 ALERT type 1 CIF construction/syntax error, inconsistent or missing data  
3 ALERT type 2 Indicator that the structure model may be wrong or deficient  
9 ALERT type 3 Indicator that the structure quality may be low  
4 ALERT type 4 Improvement, methodology, query or suggestion  
3 ALERT type 5 Informative message, check

---

It is advisable to attempt to resolve as many as possible of the alerts in all categories. Often the minor alerts point to easily fixed oversights, errors and omissions in your CIF or refinement strategy, so attention to these fine details can be worthwhile. In order to resolve some of the more serious problems it may be necessary to carry out additional measurements or structure refinements. However, the purpose of your study may justify the reported deviations and the more serious of these should normally be commented upon in the discussion or experimental section of a paper or in the "special\_details" fields of the CIF. checkCIF was carefully designed to identify outliers and unusual parameters, but every test has its limitations and alerts that are not important in a particular case may appear. Conversely, the absence of alerts does not guarantee there are no aspects of the results needing attention. It is up to the individual to critically assess their own results and, if necessary, seek expert advice.

### **Publication of your CIF in IUCr journals**

A basic structural check has been run on your CIF. These basic checks will be run on all CIFs submitted for publication in IUCr journals (*Acta Crystallographica*, *Journal of Applied Crystallography*, *Journal of Synchrotron Radiation*); however, if you intend to submit to *Acta Crystallographica Section C* or *E* or *IUCrData*, you should make sure that full publication checks are run on the final version of your CIF prior to submission.

### **Publication of your CIF in other journals**

Please refer to the *Notes for Authors* of the relevant journal for any special instructions relating to CIF submission.

---

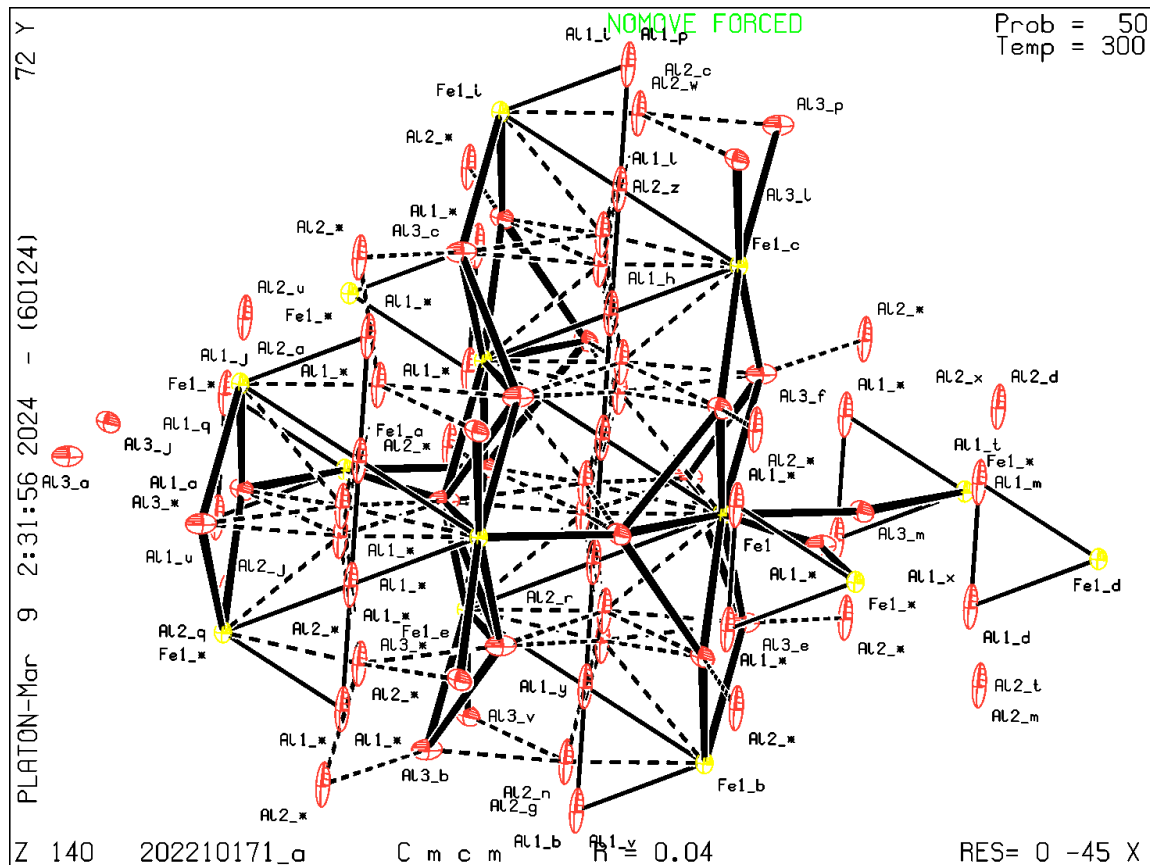

Supplement: s1 [file s1 › Al5.72Fe2checkcif.pdf]
