# Supplementary material
Source: MDPI journal article supplement (https://www.mdpi.com/2075-4701/14/3/337)
Supplement: s1 [file s1]

Archive with 5 entries (5 files):
- Al12.48Fe6.52.cif
- Al12.48Fe6.52checkcif.pdf
- Al5.72Fe2.cif
- Al5.72Fe2checkcif.pdf
- metals-2913096-supplementary.pdf
