# Supplementary material
Source: MDPI journal article supplement (https://www.mdpi.com/2075-4701/14/3/337)
Supplement: s1 [file s1 › Al5.72Fe2.cif]

data_20221017(1)_a

_audit_update_record
;
2023-11-23 # Formatted by publCIF

;
_publcif_datablock.id '{fbae0774-d52c-4f66-b6cf-fa92db58e290}'

_publ_section_exptl_refinement
;
(type here to add)
;

_publ_section_exptl_prep
;
(type here to add)
;

_publ_manuscript_text
;
(type here to add)
;
 
_audit_creation_method            'SHELXL-2016/6'
_shelx_SHELXL_version_number      '2016/6'
_chemical_name_systematic         ?
_chemical_name_common             ?
_chemical_melting_point           ?
_chemical_formula_moiety          ?
_chemical_formula_sum
 'Al2.86 Fe' 
_chemical_formula_weight          132.98

loop_
 _atom_type_symbol
 _atom_type_description
 _atom_type_scat_dispersion_real
 _atom_type_scat_dispersion_imag
 _atom_type_scat_source
 'Al'  'Al'   0.0645   0.0514
 'International Tables Vol C Tables 4.2.6.8 and 6.1.1.4'
 'Fe'  'Fe'   0.3463   0.8444
 'International Tables Vol C Tables 4.2.6.8 and 6.1.1.4'
 
_space_group_crystal_system       orthorhombic
_space_group_IT_number            63
_space_group_name_H-M_alt         'C m c m'
_space_group_name_Hall            '-C 2c 2'
 
_shelx_space_group_comment
;
The symmetry employed for this shelxl refinement is uniquely defined
by the following loop, which should always be used as a source of
symmetry information in preference to the above space-group names.
They are only intended as comments.
;
 
loop_
 _space_group_symop_operation_xyz
 'x, y, z'
 '-x, -y, z+1/2'
 '-x, y, -z+1/2'
 'x, -y, -z'
 'x+1/2, y+1/2, z'
 '-x+1/2, -y+1/2, z+1/2'
 '-x+1/2, y+1/2, -z+1/2'
 'x+1/2, -y+1/2, -z'
 '-x, -y, -z'
 'x, y, -z-1/2'
 'x, -y, z-1/2'
 '-x, y, z'
 '-x+1/2, -y+1/2, -z'
 'x+1/2, y+1/2, -z-1/2'
 'x+1/2, -y+1/2, z-1/2'
 '-x+1/2, y+1/2, z'
 
_cell_length_a                    7.635(3)
_cell_length_b                    6.392(2)
_cell_length_c                    4.2007(14)
_cell_angle_alpha                 90
_cell_angle_beta                  90
_cell_angle_gamma                 90
_cell_volume                      205.01(12)
_cell_formula_units_Z             4
_cell_measurement_temperature     300(2)
_cell_measurement_reflns_used     909
_cell_measurement_theta_min       4.16
_cell_measurement_theta_max       26.31
 
_exptl_crystal_description        Lump
_exptl_crystal_colour             drak
_exptl_crystal_density_meas       ?
_exptl_crystal_density_method     ?
_exptl_crystal_density_diffrn     4.308          
_exptl_crystal_F_000              253
_exptl_transmission_factor_min    ?
_exptl_transmission_factor_max    ?
_exptl_crystal_size_max           0.08
_exptl_crystal_size_mid           0.06
_exptl_crystal_size_min           0.03
_exptl_absorpt_coefficient_mu     8.087
_shelx_estimated_absorpt_T_min    ?
_shelx_estimated_absorpt_T_max    ?
_exptl_absorpt_correction_type    multi-scan
_exptl_absorpt_correction_T_min   0.5142
_exptl_absorpt_correction_T_max   0.7455
_exptl_absorpt_process_details    ?
_diffrn_ambient_temperature       300(2)
_diffrn_radiation_wavelength      0.71073
_diffrn_radiation_type            MoK\a
_diffrn_source                    ?
_diffrn_measurement_device_type   'Bruker D8 Venture Photon 100 CMOS'
_diffrn_measurement_method        ?
_diffrn_detector_area_resol_mean  ?
_diffrn_reflns_number             283
_diffrn_reflns_av_unetI/netI      0.0915
_diffrn_reflns_av_R_equivalents   0.0567
_diffrn_reflns_limit_h_min        -6
_diffrn_reflns_limit_h_max        9
_diffrn_reflns_limit_k_min        -6
_diffrn_reflns_limit_k_max        7
_diffrn_reflns_limit_l_min        -4
_diffrn_reflns_limit_l_max        4
_diffrn_reflns_theta_min          4.158
_diffrn_reflns_theta_max          24.997
_diffrn_reflns_theta_full         24.997
_diffrn_measured_fraction_theta_max   0.893
_diffrn_measured_fraction_theta_full  0.893
_diffrn_reflns_Laue_measured_fraction_max    0.893
_diffrn_reflns_Laue_measured_fraction_full   0.893
_diffrn_reflns_point_group_measured_fraction_max   0.893
_diffrn_reflns_point_group_measured_fraction_full  0.893
_reflns_number_total              100
_reflns_number_gt                 76
_reflns_threshold_expression      'I > 2\s(I)'
_reflns_Friedel_coverage          0.000
_reflns_Friedel_fraction_max      .
_reflns_Friedel_fraction_full     .
 
_reflns_special_details
;
#----------------------------------------------------------------
CIF VALIDATION REPORT:
#----------------------------------------------------------------
Alert level A
PLAT029_ALERT_3_A _diffrn_measured_fraction_theta_full value Low . 0.893 Why?

Response: The high angle diffraction data are not very good 
since the structure is highly disordered. 
PLAT088_ALERT_3_A Poor Data / Parameter Ratio .................... 5.26 Note

Response: As the structure is highly disordered thus it requires more parameters 
to refine the model thus leads to a poor data/parameter ratio.
#----------------------------------------------------------------
Alert level B
PLAT911_ALERT_3_B Missing FCF Refl Between Thmin & STh/L= 0.595 12 Report
1 7 0, 3 7 0, 4 4 0, 8 0 0, 0 6 3, 1 5 3,
2 4 3, 3 5 3, 0 4 4, 1 3 4, 2 4 4, 3 3 4,

Response: The missing FCF Refl(ections) Between Thmin & STh/L = 0.595 12 are 
caused by the poor high angle diffraction data, actually it has been 
checked manually that the above listed 12 reflection are too weak to be
 integrated and included in the solving and refining the structural model. 
 Reflections were merged by SHELXL according to the crystal
 class for the calculation of statistics and refinement.

These are correct
#----------------------------------------------------------------
 
 _reflns_Friedel_fraction is defined as the number of unique
 Friedel pairs measured divided by the number that would be
 possible theoretically, ignoring centric projections and
 systematic absences.
;
 
_computing_data_collection        ?
_computing_cell_refinement        ?
_computing_data_reduction         ?
_computing_structure_solution     'SHELXT 2014/5 (Sheldrick, 2014)'
_computing_structure_refinement 'SHELXL-2016/6 (Sheldrick, 2016)'
_computing_molecular_graphics     ?
_computing_publication_material   ?
_refine_special_details           ?
_refine_ls_structure_factor_coef  Fsqd
_refine_ls_matrix_type            full
_refine_ls_weighting_scheme       calc
_refine_ls_weighting_details
'w=1/[\s^2^(Fo^2^)] where P=(Fo^2^+2Fc^2^)/3'
_atom_sites_solution_primary      ?
_atom_sites_solution_secondary    ?
_atom_sites_solution_hydrogens    .
_refine_ls_hydrogen_treatment     undef
_refine_ls_extinction_method      none
_refine_ls_extinction_coef        .
_refine_ls_number_reflns          100
_refine_ls_number_parameters      19
_refine_ls_number_restraints      13
_refine_ls_R_factor_all           0.0611
_refine_ls_R_factor_gt            0.0363
_refine_ls_wR_factor_ref          0.0844
_refine_ls_wR_factor_gt           0.0763
_refine_ls_goodness_of_fit_ref    1.017
_refine_ls_restrained_S_all       0.948
_refine_ls_shift/su_max           0.000
_refine_ls_shift/su_mean          0.000
 
loop_
 _atom_site_label
 _atom_site_type_symbol
 _atom_site_fract_x
 _atom_site_fract_y
 _atom_site_fract_z
 _atom_site_U_iso_or_equiv
 _atom_site_adp_type
 _atom_site_occupancy
 _atom_site_site_symmetry_order  
 _atom_site_calc_flag
 _atom_site_refinement_flags_posn
 _atom_site_refinement_flags_adp
 _atom_site_refinement_flags_occupancy
 _atom_site_disorder_assembly
 _atom_site_disorder_group
Fe1 Fe 0.000000 0.8279(4) 0.250000 0.0081(8) Uani 1 4 d S TU P . .
Al1 Al 0.000000 0.500000 0.000000 0.03(2) Uani 0.50(10) 4 d S TU P . .
Al2 Al 0.000000 0.537(6) 0.81(4) 0.03(2) Uani 0.18(5) 2 d S TU P . .
Al3 Al 0.1888(4) 0.1454(6) 0.250000 0.0158(12) Uani 1 2 d S T P . .
 
loop_
 _atom_site_aniso_label
 _atom_site_aniso_U_11
 _atom_site_aniso_U_22
 _atom_site_aniso_U_33
 _atom_site_aniso_U_23
 _atom_site_aniso_U_13
 _atom_site_aniso_U_12
Fe1 0.0029(13) 0.0086(12) 0.0128(16) 0.000 0.000 0.000
Al1 0.010(5) 0.005(14) 0.06(5) 0.00(3) 0.000 0.000
Al2 0.010(5) 0.005(14) 0.06(5) 0.00(3) 0.000 0.000
Al3 0.013(2) 0.022(2) 0.012(3) 0.000 0.000 -0.0122(15)
 
_geom_special_details
;
 All esds (except the esd in the dihedral angle between two l.s. planes)
 are estimated using the full covariance matrix.  The cell esds are taken
 into account individually in the estimation of esds in distances, angles
 and torsion angles; correlations between esds in cell parameters are only
 used when they are defined by crystal symmetry.  An approximate (isotropic)
 treatment of cell esds is used for estimating esds involving l.s. planes.
;
 
loop_
 _geom_bond_atom_site_label_1
 _geom_bond_atom_site_label_2
 _geom_bond_distance
 _geom_bond_site_symmetry_2
 _geom_bond_publ_flag
Fe1 Al1 2.344(2) . ?
Fe1 Al1 2.344(2) 2_565 ?
Fe1 Al2 2.35(5) 9_566 ?
Fe1 Al2 2.35(5) 2_564 ?
Fe1 Al3 2.489(4) 1_565 ?
Fe1 Al3 2.489(4) 3_565 ?
Fe1 Al3 2.553(2) 11_566 ?
Fe1 Al3 2.553(2) 9_565 ?
Fe1 Al3 2.553(2) 11_565 ?
Fe1 Al3 2.553(2) 9_566 ?
Fe1 Al2 2.61(12) 1_554 ?
Fe1 Al2 2.61(12) 10_557 ?
Al1 Al2 0.81(14) 9_566 ?
Al1 Al2 0.81(14) 1_554 ?
Al1 Al2 1.34(15) 10_556 ?
Al1 Al2 1.34(15) 2_564 ?
Al1 Al1 2.1003(7) 2_564 ?
Al1 Al1 2.1003(7) 2_565 ?
Al1 Al3 2.759(3) 15_455 ?
Al1 Al3 2.759(3) 7 ?
Al1 Al3 2.759(3) 13 ?
Al1 Al3 2.759(3) 5_455 ?
Al2 Al2 0.5(3) 10_557 ?
Al2 Al2 1.6(3) 9_567 ?
Al2 Al2 2.154(18) 2_564 ?
Al2 Al2 2.154(18) 2_565 ?
Al2 Al3 2.50(3) 11_566 ?
Al2 Al3 2.50(3) 9_566 ?
Al2 Al3 2.66(3) 15_456 ?
Al2 Al3 2.66(3) 13_556 ?
Al3 Al3 2.660(4) 13_556 ?
Al3 Al3 2.660(4) 13 ?
 
loop_
 _geom_angle_atom_site_label_1
 _geom_angle_atom_site_label_2
 _geom_angle_atom_site_label_3
 _geom_angle
 _geom_angle_site_symmetry_1
 _geom_angle_site_symmetry_3
 _geom_angle_publ_flag
Al1 Fe1 Al1 53.23(6) . 2_565 ?
Al1 Fe1 Al2 20(4) . 9_566 ?
Al1 Fe1 Al2 33(4) 2_565 9_566 ?
Al1 Fe1 Al2 33(4) . 2_564 ?
Al1 Fe1 Al2 20(4) 2_565 2_564 ?
Al2 Fe1 Al2 13(7) 9_566 2_564 ?
Al1 Fe1 Al3 136.79(7) . 1_565 ?
Al1 Fe1 Al3 136.79(7) 2_565 1_565 ?
Al2 Fe1 Al3 144.1(6) 9_566 1_565 ?
Al2 Fe1 Al3 144.1(6) 2_564 1_565 ?
Al1 Fe1 Al3 136.79(7) . 3_565 ?
Al1 Fe1 Al3 136.79(7) 2_565 3_565 ?
Al2 Fe1 Al3 144.1(6) 9_566 3_565 ?
Al2 Fe1 Al3 144.1(6) 2_564 3_565 ?
Al3 Fe1 Al3 70.79(19) 1_565 3_565 ?
Al1 Fe1 Al3 115.36(11) . 11_566 ?
Al1 Fe1 Al3 72.02(9) 2_565 11_566 ?
Al2 Fe1 Al3 99(3) 9_566 11_566 ?
Al2 Fe1 Al3 88(3) 2_564 11_566 ?
Al3 Fe1 Al3 67.57(12) 1_565 11_566 ?
Al3 Fe1 Al3 105.81(10) 3_565 11_566 ?
Al1 Fe1 Al3 72.02(9) . 9_565 ?
Al1 Fe1 Al3 115.36(11) 2_565 9_565 ?
Al2 Fe1 Al3 88(3) 9_566 9_565 ?
Al2 Fe1 Al3 99(3) 2_564 9_565 ?
Al3 Fe1 Al3 105.81(10) 1_565 9_565 ?
Al3 Fe1 Al3 67.57(12) 3_565 9_565 ?
Al3 Fe1 Al3 172.33(19) 11_566 9_565 ?
Al1 Fe1 Al3 72.02(9) . 11_565 ?
Al1 Fe1 Al3 115.36(11) 2_565 11_565 ?
Al2 Fe1 Al3 88(3) 9_566 11_565 ?
Al2 Fe1 Al3 99(3) 2_564 11_565 ?
Al3 Fe1 Al3 67.57(12) 1_565 11_565 ?
Al3 Fe1 Al3 105.81(10) 3_565 11_565 ?
Al3 Fe1 Al3 110.69(12) 11_566 11_565 ?
Al3 Fe1 Al3 68.76(12) 9_565 11_565 ?
Al1 Fe1 Al3 115.36(11) . 9_566 ?
Al1 Fe1 Al3 72.02(9) 2_565 9_566 ?
Al2 Fe1 Al3 99(3) 9_566 9_566 ?
Al2 Fe1 Al3 88(3) 2_564 9_566 ?
Al3 Fe1 Al3 105.81(10) 1_565 9_566 ?
Al3 Fe1 Al3 67.57(12) 3_565 9_566 ?
Al3 Fe1 Al3 68.76(12) 11_566 9_566 ?
Al3 Fe1 Al3 110.69(12) 9_565 9_566 ?
Al3 Fe1 Al3 172.33(19) 11_565 9_566 ?
Al1 Fe1 Al2 18(2) . 1_554 ?
Al1 Fe1 Al2 71(2) 2_565 1_554 ?
Al2 Fe1 Al2 38(6) 9_566 1_554 ?
Al2 Fe1 Al2 51.2(16) 2_564 1_554 ?
Al3 Fe1 Al2 125.5(16) 1_565 1_554 ?
Al3 Fe1 Al2 125.5(16) 3_565 1_554 ?
Al3 Fe1 Al2 128.7(15) 11_566 1_554 ?
Al3 Fe1 Al2 58.0(17) 9_565 1_554 ?
Al3 Fe1 Al2 58.0(17) 11_565 1_554 ?
Al3 Fe1 Al2 128.7(15) 9_566 1_554 ?
Al1 Fe1 Al2 71(2) . 10_557 ?
Al1 Fe1 Al2 18(2) 2_565 10_557 ?
Al2 Fe1 Al2 51.2(16) 9_566 10_557 ?
Al2 Fe1 Al2 38(6) 2_564 10_557 ?
Al3 Fe1 Al2 125.5(16) 1_565 10_557 ?
Al3 Fe1 Al2 125.5(16) 3_565 10_557 ?
Al3 Fe1 Al2 58.0(17) 11_566 10_557 ?
Al3 Fe1 Al2 128.7(15) 9_565 10_557 ?
Al3 Fe1 Al2 128.7(15) 11_565 10_557 ?
Al3 Fe1 Al2 58.0(17) 9_566 10_557 ?
Al2 Fe1 Al2 89(4) 1_554 10_557 ?
Al2 Al1 Al2 180(5) 9_566 1_554 ?
Al2 Al1 Al2 173(5) 9_566 10_556 ?
Al2 Al1 Al2 7(5) 1_554 10_556 ?
Al2 Al1 Al2 7(5) 9_566 2_564 ?
Al2 Al1 Al2 173(5) 1_554 2_564 ?
Al2 Al1 Al2 180(3) 10_556 2_564 ?
Al2 Al1 Al1 163(5) 9_566 2_564 ?
Al2 Al1 Al1 17(5) 1_554 2_564 ?
Al2 Al1 Al1 10.3(16) 10_556 2_564 ?
Al2 Al1 Al1 169.7(16) 2_564 2_564 ?
Al2 Al1 Al1 17(5) 9_566 2_565 ?
Al2 Al1 Al1 163(5) 1_554 2_565 ?
Al2 Al1 Al1 169.7(16) 10_556 2_565 ?
Al2 Al1 Al1 10.3(16) 2_564 2_565 ?
Al1 Al1 Al1 180.0 2_564 2_565 ?
Al2 Al1 Fe1 81(5) 9_566 . ?
Al2 Al1 Fe1 99(5) 1_554 . ?
Al2 Al1 Fe1 106.3(16) 10_556 . ?
Al2 Al1 Fe1 73.7(16) 2_564 . ?
Al1 Al1 Fe1 116.61(3) 2_564 . ?
Al1 Al1 Fe1 63.39(3) 2_565 . ?
Al2 Al1 Fe1 99(5) 9_566 9_565 ?
Al2 Al1 Fe1 81(5) 1_554 9_565 ?
Al2 Al1 Fe1 73.7(16) 10_556 9_565 ?
Al2 Al1 Fe1 106.3(16) 2_564 9_565 ?
Al1 Al1 Fe1 63.39(3) 2_564 9_565 ?
Al1 Al1 Fe1 116.61(3) 2_565 9_565 ?
Fe1 Al1 Fe1 180.0 . 9_565 ?
Al2 Al1 Al3 105(2) 9_566 15_455 ?
Al2 Al1 Al3 75(2) 1_554 15_455 ?
Al2 Al1 Al3 71.7(7) 10_556 15_455 ?
Al2 Al1 Al3 108.3(7) 2_564 15_455 ?
Al1 Al1 Al3 67.62(3) 2_564 15_455 ?
Al1 Al1 Al3 112.38(3) 2_565 15_455 ?
Fe1 Al1 Al3 118.14(7) . 15_455 ?
Fe1 Al1 Al3 61.86(7) 9_565 15_455 ?
Al2 Al1 Al3 75(2) 9_566 7 ?
Al2 Al1 Al3 105(2) 1_554 7 ?
Al2 Al1 Al3 108.3(7) 10_556 7 ?
Al2 Al1 Al3 71.7(7) 2_564 7 ?
Al1 Al1 Al3 112.38(3) 2_564 7 ?
Al1 Al1 Al3 67.62(3) 2_565 7 ?
Fe1 Al1 Al3 61.86(7) . 7 ?
Fe1 Al1 Al3 118.14(7) 9_565 7 ?
Al3 Al1 Al3 180.00(14) 15_455 7 ?
Al2 Al1 Al3 105(2) 9_566 13 ?
Al2 Al1 Al3 75(2) 1_554 13 ?
Al2 Al1 Al3 71.7(7) 10_556 13 ?
Al2 Al1 Al3 108.3(7) 2_564 13 ?
Al1 Al1 Al3 67.62(3) 2_564 13 ?
Al1 Al1 Al3 112.38(3) 2_565 13 ?
Fe1 Al1 Al3 118.14(7) . 13 ?
Fe1 Al1 Al3 61.86(7) 9_565 13 ?
Al3 Al1 Al3 118.90(10) 15_455 13 ?
Al3 Al1 Al3 61.10(10) 7 13 ?
Al2 Al1 Al3 75(2) 9_566 5_455 ?
Al2 Al1 Al3 105(2) 1_554 5_455 ?
Al2 Al1 Al3 108.3(7) 10_556 5_455 ?
Al2 Al1 Al3 71.7(7) 2_564 5_455 ?
Al1 Al1 Al3 112.38(3) 2_564 5_455 ?
Al1 Al1 Al3 67.62(3) 2_565 5_455 ?
Fe1 Al1 Al3 61.86(7) . 5_455 ?
Fe1 Al1 Al3 118.14(7) 9_565 5_455 ?
Al3 Al1 Al3 61.10(10) 15_455 5_455 ?
Al3 Al1 Al3 118.90(10) 7 5_455 ?
Al3 Al1 Al3 180.0 13 5_455 ?
Al2 Al2 Al1 163(5) 10_557 1_556 ?
Al2 Al2 Al1 10.3(16) 10_557 2_565 ?
Al1 Al2 Al1 153(6) 1_556 2_565 ?
Al2 Al2 Al2 163(5) 10_557 9_567 ?
Al1 Al2 Al2 0.000(9) 1_556 9_567 ?
Al1 Al2 Al2 153(6) 2_565 9_567 ?
Al2 Al2 Al2 13(2) 10_557 2_564 ?
Al1 Al2 Al2 150(7) 1_556 2_564 ?
Al1 Al2 Al2 2.6(14) 2_565 2_564 ?
Al2 Al2 Al2 150(7) 9_567 2_564 ?
Al2 Al2 Al2 167(2) 10_557 2_565 ?
Al1 Al2 Al2 4(4) 1_556 2_565 ?
Al1 Al2 Al2 157(3) 2_565 2_565 ?
Al2 Al2 Al2 4(4) 9_567 2_565 ?
Al2 Al2 Al2 154(4) 2_564 2_565 ?
Al2 Al2 Fe1 83(4) 10_557 9_566 ?
Al1 Al2 Fe1 80(3) 1_556 9_566 ?
Al1 Al2 Fe1 73(4) 2_565 9_566 ?
Al2 Al2 Fe1 80(3) 9_567 9_566 ?
Al2 Al2 Fe1 70(5) 2_564 9_566 ?
Al2 Al2 Fe1 84(3) 2_565 9_566 ?
Al2 Al2 Al3 84(3) 10_557 11_566 ?
Al1 Al2 Al3 110(7) 1_556 11_566 ?
Al1 Al2 Al3 92(4) 2_565 11_566 ?
Al2 Al2 Al3 110(7) 9_567 11_566 ?
Al2 Al2 Al3 94(3) 2_564 11_566 ?
Al2 Al2 Al3 107(4) 2_565 11_566 ?
Fe1 Al2 Al3 142(3) 9_566 11_566 ?
Al2 Al2 Al3 84(4) 10_557 9_566 ?
Al1 Al2 Al3 110(7) 1_556 9_566 ?
Al1 Al2 Al3 92(4) 2_565 9_566 ?
Al2 Al2 Al3 110(7) 9_567 9_566 ?
Al2 Al2 Al3 94(3) 2_564 9_566 ?
Al2 Al2 Al3 107(4) 2_565 9_566 ?
Fe1 Al2 Al3 142(3) 9_566 9_566 ?
Al3 Al2 Al3 70.4(10) 11_566 9_566 ?
Al2 Al2 Fe1 135(2) 10_557 1_556 ?
Al1 Al2 Fe1 63(7) 1_556 1_556 ?
Al1 Al2 Fe1 145(3) 2_565 1_556 ?
Al2 Al2 Fe1 63(7) 9_567 1_556 ?
Al2 Al2 Fe1 147(3) 2_564 1_556 ?
Al2 Al2 Fe1 58(3) 2_565 1_556 ?
Fe1 Al2 Fe1 142(6) 9_566 1_556 ?
Al3 Al2 Fe1 59.9(18) 11_566 1_556 ?
Al3 Al2 Fe1 59.9(18) 9_566 1_556 ?
Al2 Al2 Al3 84(3) 10_557 15_456 ?
Al1 Al2 Al3 88.2(17) 1_556 15_456 ?
Al1 Al2 Al3 80(3) 2_565 15_456 ?
Al2 Al2 Al3 88.2(17) 9_567 15_456 ?
Al2 Al2 Al3 79(4) 2_564 15_456 ?
Al2 Al2 Al3 90(3) 2_565 15_456 ?
Fe1 Al2 Al3 63.4(11) 9_566 15_456 ?
Al3 Al2 Al3 149(2) 11_566 15_456 ?
Al3 Al2 Al3 80.2(6) 9_566 15_456 ?
Fe1 Al2 Al3 113(3) 1_556 15_456 ?
Al2 Al2 Al3 84(3) 10_557 13_556 ?
Al1 Al2 Al3 88.2(17) 1_556 13_556 ?
Al1 Al2 Al3 80(3) 2_565 13_556 ?
Al2 Al2 Al3 88.2(17) 9_567 13_556 ?
Al2 Al2 Al3 79(4) 2_564 13_556 ?
Al2 Al2 Al3 90(3) 2_565 13_556 ?
Fe1 Al2 Al3 63.4(11) 9_566 13_556 ?
Al3 Al2 Al3 80.2(6) 11_566 13_556 ?
Al3 Al2 Al3 149(2) 9_566 13_556 ?
Fe1 Al2 Al3 113(3) 1_556 13_556 ?
Al3 Al2 Al3 126(2) 15_456 13_556 ?
Fe1 Al3 Al2 109.1(6) 1_545 2_564 ?
Fe1 Al3 Al2 109.1(6) 1_545 9_566 ?
Al2 Al3 Al2 12(7) 2_564 9_566 ?
Fe1 Al3 Fe1 74.19(10) 1_545 9_565 ?
Al2 Al3 Fe1 73(3) 2_564 9_565 ?
Al2 Al3 Fe1 62(3) 9_566 9_565 ?
Fe1 Al3 Fe1 74.19(10) 1_545 9_566 ?
Al2 Al3 Fe1 62(3) 2_564 9_566 ?
Al2 Al3 Fe1 73(3) 9_566 9_566 ?
Fe1 Al3 Fe1 110.69(12) 9_565 9_566 ?
Fe1 Al3 Fe1 151.55(19) 1_545 5_545 ?
Al2 Al3 Fe1 99.2(5) 2_564 5_545 ?
Al2 Al3 Fe1 99.2(5) 9_566 5_545 ?
Fe1 Al3 Fe1 118.51(8) 9_565 5_545 ?
Fe1 Al3 Fe1 118.51(8) 9_566 5_545 ?
Fe1 Al3 Al3 127.84(11) 1_545 13_556 ?
Al2 Al3 Al3 73(3) 2_564 13_556 ?
Al2 Al3 Al3 83(3) 9_566 13_556 ?
Fe1 Al3 Al3 144.5(2) 9_565 13_556 ?
Fe1 Al3 Al3 60.99(7) 9_566 13_556 ?
Fe1 Al3 Al3 57.52(11) 5_545 13_556 ?
Fe1 Al3 Al3 127.84(11) 1_545 13 ?
Al2 Al3 Al3 83(3) 2_564 13 ?
Al2 Al3 Al3 73(3) 9_566 13 ?
Fe1 Al3 Al3 60.99(7) 9_565 13 ?
Fe1 Al3 Al3 144.5(2) 9_566 13 ?
Fe1 Al3 Al3 57.52(11) 5_545 13 ?
Al3 Al3 Al3 104.3(2) 13_556 13 ?
Fe1 Al3 Al2 99.1(8) 1_545 6_554 ?
Al2 Al3 Al2 149(2) 2_564 6_554 ?
Al2 Al3 Al2 151.8(14) 9_566 6_554 ?
Fe1 Al3 Al2 128(3) 9_565 6_554 ?
Fe1 Al3 Al2 117(3) 9_566 6_554 ?
Fe1 Al3 Al2 52.6(9) 5_545 6_554 ?
Al3 Al3 Al2 80(2) 13_556 6_554 ?
Al3 Al3 Al2 89(3) 13 6_554 ?
Fe1 Al3 Al2 99.1(8) 1_545 13_556 ?
Al2 Al3 Al2 151.8(14) 2_564 13_556 ?
Al2 Al3 Al2 149(2) 9_566 13_556 ?
Fe1 Al3 Al2 117(3) 9_565 13_556 ?
Fe1 Al3 Al2 128(3) 9_566 13_556 ?
Fe1 Al3 Al2 52.6(9) 5_545 13_556 ?
Al3 Al3 Al2 89(3) 13_556 13_556 ?
Al3 Al3 Al2 80(2) 13 13_556 ?
Al2 Al3 Al2 12(7) 6_554 13_556 ?
Fe1 Al3 Al1 102.96(13) 1_545 6 ?
Al2 Al3 Al1 137(2) 2_564 6 ?
Al2 Al3 Al1 144(2) 9_566 6 ?
Fe1 Al3 Al1 145.28(10) 9_565 6 ?
Fe1 Al3 Al1 101.28(5) 9_566 6 ?
Fe1 Al3 Al1 51.35(8) 5_545 6 ?
Al3 Al3 Al1 64.30(12) 13_556 6 ?
Al3 Al3 Al1 99.65(16) 13 6 ?
Al2 Al3 Al1 17(3) 6_554 6 ?
Al2 Al3 Al1 29(3) 13_556 6 ?
Fe1 Al3 Al1 102.96(13) 1_545 5_545 ?
Al2 Al3 Al1 144(2) 2_564 5_545 ?
Al2 Al3 Al1 137(2) 9_566 5_545 ?
Fe1 Al3 Al1 101.28(5) 9_565 5_545 ?
Fe1 Al3 Al1 145.28(10) 9_566 5_545 ?
Fe1 Al3 Al1 51.35(8) 5_545 5_545 ?
Al3 Al3 Al1 99.65(17) 13_556 5_545 ?
Al3 Al3 Al1 64.30(12) 13 5_545 ?
Al2 Al3 Al1 29(3) 6_554 5_545 ?
Al2 Al3 Al1 17(3) 13_556 5_545 ?
Al1 Al3 Al1 44.75(6) 6 5_545 ?
 
_refine_diff_density_max    0.555
_refine_diff_density_min   -0.708
_refine_diff_density_rms    0.190

_shelx_res_file
;
TITL 20221017(1)_a.res in Cmcm
    20221017(1)_a.res
    created by SHELXL-2016/6 at 09:37:55 on 21-Jul-2023
REM Old TITL 20221017(1) in Cmcm
REM SHELXT solution in Cmcm
REM R1 0.163,  Rweak 0.009,  Alpha 0.039,  Orientation a'=b, b'=a, c'=-c
REM Formula found by SHELXT:  Al3 Fe
CELL  0.71073   7.6351   6.3921   4.2007   90.000   90.000   90.000
ZERR    4.000   0.0026   0.0024   0.0014    0.000    0.000    0.000
LATT  7
SYMM -X, -Y, 1/2+Z
SYMM -X, Y, 1/2-Z
SYMM X, -Y, -Z
SFAC AL FE
UNIT 11.4348 4
ACTA
TEMP 26.840
L.S. 10
REM BOND $H
LIST 4
FMAP 2
SHEL 999 0.84
EADP AL1 AL2
ISOR AL1 AL2
DELU
PLAN 20
WGHT    0.000000
FVAR       0.78553   0.49630   0.36241
FE1   2    0.000000    0.827902    0.250000    10.25000    0.00294    0.00855 =
         0.01282    0.00000    0.00000    0.00000
AL1   1    0.000000    0.500000    0.000000    20.25000    0.00991    0.00476 =
         0.06051    0.00057    0.00000    0.00000
AL2   1    0.000000    0.537492    0.814810    30.25000    0.00991    0.00476 =
         0.06051    0.00057    0.00000    0.00000
AL3   1    0.188832    0.145374    0.250000    10.50000    0.01317    0.02192 =
         0.01244    0.00000    0.00000   -0.01216
HKLF 4


REM  20221017(1)_a.res in Cmcm
REM R1 =  0.0363 for      76 Fo > 4sig(Fo)  and  0.0611 for all     100 data
REM     19 parameters refined using     13 restraints

END

WGHT      0.0000      0.0000

REM Highest difference peak  0.555,  deepest hole -0.708,  1-sigma level  0.190
Q1    1   0.0000  0.9106 -0.0869  10.50000  0.05    0.56
Q2    1  -0.0901  0.7588  0.0989  11.00000  0.05    0.54
Q3    1  -0.0870  0.7022  0.0574  11.00000  0.05    0.50
Q4    1  -0.0843  0.5840  0.7500  10.50000  0.05    0.46
Q5    1   0.1476  0.3140  0.0451  11.00000  0.05    0.45
Q6    1   0.0000  0.7383 -0.0359  10.50000  0.05    0.40
Q7    1   0.0000  0.4695  0.8634  10.50000  0.05    0.38
Q8    1   0.2112 -0.1036  0.2500  10.50000  0.05    0.37
Q9    1   0.2905  0.0764  0.1322  11.00000  0.05    0.33
Q10   1   0.2111  0.1925  0.2500  10.50000  0.05    0.29
Q11   1   0.1489  0.1696  0.1151  11.00000  0.05    0.27
Q12   1   0.3598  0.0914  0.2500  10.50000  0.05    0.27
Q13   1   0.1480  0.0425  0.1479  11.00000  0.05    0.26
Q14   1   0.0000  0.6128  0.8858  10.50000  0.05    0.25
Q15   1   0.0000  0.2253  0.2500  10.25000  0.05    0.22
Q16   1   0.1657  0.0249  0.2500  10.50000  0.05    0.22
Q17   1   0.2040  0.0576  0.0649  11.00000  0.05    0.21
Q18   1   0.0000  0.9571  0.2500  10.25000  0.05    0.18
Q19   1  -0.1773  0.5277  0.8570  11.00000  0.05    0.11
Q20   1   0.0000  0.6864  0.2500  10.25000  0.05    0.11
;
_shelx_res_checksum    8197

_shelx_hkl_file
;
   0   2   0  879.41   87.89
   0   4   0 1475.55  153.88
   0   6   0 3495.75  342.37
  -1   1   0  446.76   46.70
   1  -1   0  403.26   46.00
   1  -3   0 8914.61  772.32
  -1   3   0 9059.59  773.12
   1   5   0  128.09   65.99
  -1   5   0  177.28   73.19
   2   0   0 2676.43  238.38
   2  -2   0   18.80   27.30
  -2   2   0   23.60   26.80
   2  -4   0  533.05   88.99
  -2   4   0  600.34  105.59
   2   6   0  930.61  147.69
  -2   6   0  948.61  161.08
   3  -1   0  583.34   79.39
  -3   1   0  601.04   79.99
   3   1   0  651.63   76.79
   3  -3   0 1064.89  118.59
  -3   3   0  926.91  125.49
   3  -5   0  159.88   66.89
  -3   5   0  191.68   95.19
   4   0   0 6231.78  562.64
  -4   0   0 6537.65  562.44
  -4   2   0   22.30   48.90
   4   2   0   33.20   45.80
   4  -2   0   30.10   47.10
   4  -6   0 1175.18  195.28
   5  -1   0  885.01  130.19
   5   1   0  958.70  134.59
  -5   1   0 1003.30  132.19
  -5   3   0 7550.24  679.53
   5   3   0 7511.15  678.33
   5  -3   0 7688.23  680.13
   5  -5   0 -129.39   93.69
   5  -7   0  358.86  161.68
  -6   0   0 7489.45  656.93
   6   0   0 7118.89  657.93
  -6   2   0  127.19   97.89
   6   2   0  250.57   87.59
   6  -2   0  446.16  112.29
   6   4   0  107.89   91.59
   6  -4   0  171.08  106.29
   6   6   0 1991.00  277.57
   6  -6   0 1716.03  277.47
   7  -1   0   -4.20   92.29
   7   1   0   23.20  103.99
   7  -3   0 1217.78  202.38
   7   3   0 1282.87  217.48
   7  -5   0  591.64  148.29
   7   5   0  124.39  132.39
   8   2   0   20.40  133.89
   8  -2   0  -68.99  120.39
   8   4   0  278.87  156.88
   8  -4   0   49.50  147.39
   9   1   0  -45.90  144.69
   9  -1   0  -63.69  145.79
   9  -3   0  227.18  170.58
   9   3   0  593.54  205.18
   0   0  -1   64.29   32.70
   0   0  -1   35.30   39.50
   0   0  -1   26.60   29.20
   0   0  -1   -6.70   25.90
   0   0  -1   30.00   30.70
   0   0   1  -31.70   27.90
   0   0   1   20.50   14.60
   0   0  -1   34.60   17.40
   0   0   1   20.50   25.40
   0   0   1   44.30   34.20
   0   0  -1  -44.20   34.30
   0   0  -1   31.60   20.10
   0   0   1   24.80   31.90
   0   0   1   16.60   19.30
   0   0   1   40.90   40.70
   0   2   1    3.80   13.30
   0   2  -1    6.40   32.50
   0   4   1  336.97   55.19
   0   4  -1  364.16   81.69
   0   6   1  918.71  133.99
   0   6  -1  385.86  140.69
  -1   1  -1 1544.95  143.19
   1   1   1 1498.95  133.59
   1  -1  -1 1564.14  136.79
   1  -1   1 1502.15  141.89
  -1   3  -1  381.36   73.69
  -1   3   1  325.37   51.89
   1   5   1  570.74   92.39
  -1   5  -1  439.56  104.29
  -1   5   1  531.05   91.29
   1   5  -1  503.75  104.39
   1   7   1  446.76  124.59
  -1   7   1  340.87  134.69
   2   0   1   31.50   22.10
  -2   0  -1   25.80   22.90
  -2   2  -1 7773.62  674.83
   2  -2  -1 7900.61  666.23
   2   2   1 7705.93  661.33
  -2   2   1 7596.74  664.13
   2  -2   1 7666.63  667.53
   2  -4  -1 1981.00  201.08
  -2   4  -1 2260.77  226.38
   2  -4   1 2056.19  211.08
  -2   4   1 2134.09  210.58
   2   6   1    2.70   82.49
  -2   6   1  263.57  106.49
   3  -1  -1 7464.85  640.34
  -3   1  -1 7209.38  641.94
   3   1   1 7447.56  637.64
  -3   1   1 7545.84  638.54
   3  -1   1 7216.48  639.94
  -3  -1  -1 7328.17  636.34
   3   3   1  -16.50   35.80
  -3   3  -1   73.89   61.99
   3  -3   1   21.20   48.20
   3  -5  -1 3615.34  339.47
  -3   5  -1 3248.48  373.26
   3  -5   1 3765.42  347.67
  -3   5   1 3589.84  347.57
   3   7   1  782.22  171.58
  -4   0  -1   30.60   46.30
   4   0   1   23.60   35.40
   4   0  -1    8.30   42.00
  -4   2  -1 2030.00  193.68
   4  -2  -1 1564.64  183.98
   4   2   1 1764.32  179.18
   4  -2   1 1646.14  184.48
  -4   2   1 1833.22  183.88
  -4   4  -1 1063.39  195.48
   4  -4  -1 1124.99  159.28
   4   4   1 1298.87  158.38
  -4   4   1 1413.66  170.48
   4  -4   1 1367.06  161.38
   4  -6  -1  209.88  101.79
   4  -6   1  208.78  100.19
  -4   6   1   21.10  147.99
   5  -1  -1   99.89   54.79
  -5   1  -1   24.30   71.19
   5   1   1  123.39   60.39
  -5  -1  -1   52.39   60.09
  -5   1   1   59.79   63.09
   5  -1   1  203.38   74.99
   5   1  -1   93.99   56.99
   5   3   1  498.95   94.29
   5  -3  -1  468.65   96.39
  -5   3   1  258.57   96.99
   5  -3   1  356.56   94.39
   5  -5  -1   -8.10   96.79
   5   5   1  125.19   94.89
  -5   5   1  -15.30  143.09
   5  -5   1   48.10  137.39
   5   7   1  370.66  205.38
   5  -7  -1  157.48  146.39
  -6   0  -1  112.39   84.89
   6   0   1   45.90   61.99
   6   0  -1   51.49   72.49
  -6   2  -1  -73.59  100.39
   6   2   1  213.38   81.89
   6  -2  -1   47.60   77.09
  -6   2   1  286.87   97.49
   6   2  -1  247.88   89.99
   6  -2   1  206.48   92.79
   6   4   1  409.66  108.79
   6  -4  -1  -12.10  100.89
   6  -4   1  131.19  105.69
   6  -6  -1  399.66  145.29
   6   6   1  183.18  152.08
   6  -6   1  334.97  153.48
   7  -1  -1 1531.25  207.78
   7   1   1 1388.96  203.78
   7  -1   1 1270.97  201.78
   7   1  -1 1593.34  225.38
   7  -3  -1  -29.80  109.29
   7   3   1 -205.68  102.59
   7  -3   1   41.60  115.79
   7   3  -1  -94.69  154.68
   7   5   1 1179.38  216.18
   7  -5  -1 1124.79  190.58
   7   5  -1  709.93  191.98
   7  -5   1  863.61  194.38
   8   0   1  297.67  201.98
   8   0  -1   16.50  121.19
   8   2   1 2391.06  419.86
   8  -2  -1 2564.84  314.47
   8   2  -1 2220.38  318.17
   8  -2   1 2353.36  307.27
   8  -4  -1  760.42  191.88
   8   4   1  587.84  196.38
   8  -4   1  876.01  179.88
   8   4  -1 1178.28  208.68
   9  -1  -1 1013.20  212.08
   9   1   1 1109.59  227.48
   9  -1   1  857.81  188.98
   9   1  -1  626.94  201.58
   9   3   1  -74.79  168.68
   9  -3  -1  155.18  171.08
   9  -3   1   93.39  183.28
   9   3  -1 -245.88  197.28
   0   0  -2 9999.00  851.91
   0   2  -2 1679.13  171.98
   0   4  -2 2510.35  270.67
   0   4   2 2570.64  223.18
   0   6   2 1420.26  168.88
  -1   1  -2 1833.42  170.68
   1  -1  -2 1654.23  156.68
  -1  -1  -2 1745.13  154.38
  -1   3  -2 3179.98  307.37
   1   5   2  890.81   99.19
  -1   5   2  777.82  113.99
  -2   0  -2  175.88   42.80
   2   0   2  168.78   38.70
  -2   2  -2  727.93  109.49
   2   2   2  604.74   65.59
   2  -2   2  614.64   85.59
  -2   4  -2   72.19   97.59
   2  -4  -2   13.50   41.10
   2   4   2   48.60   28.40
   2   4   2   28.30   32.90
  -2   4   2  111.49   50.19
   2   6   2  175.98   67.19
  -2   6   2  231.38  101.89
  -3   1  -2  159.88   65.69
   3   1   2   35.00   37.90
   3  -1  -2    5.80   38.40
   3  -1   2   81.49   44.40
  -3  -1  -2   28.80   40.40
   3   3   2   -2.20   35.90
   3  -3  -2   93.29   49.90
  -3   3  -2  -54.99   85.69
  -3   3   2   89.99   51.49
   3  -3   2  -26.60   53.59
   3  -5  -2  756.32  116.89
   3   5   2  602.64  106.89
  -3   5   2  637.74  115.39
   3   7   2  130.39  126.69
   4   0  -2 1878.21  198.08
   4   0   2 1919.31  191.28
  -4   0  -2 1863.51  200.48
   4   2   2  670.93  100.39
  -4   2  -2  714.03  130.89
   4  -2  -2  734.83  108.79
   4  -2   2  738.93  116.19
   4  -4  -2  512.55   97.49
   4  -4   2  468.85   98.69
  -4   4   2  374.96   91.49
   4  -6  -2  453.25  111.79
   4   6   2  398.66  119.39
  -4   6   2  169.68  150.88
   5   1   2 1890.91  197.98
  -5   1  -2 1914.51  221.28
   5  -1  -2 1929.31  207.98
  -5  -1  -2 1690.13  202.58
   5  -1   2 1714.63  204.28
   5   1  -2 2018.00  218.38
   5  -3  -2 3203.78  312.57
   5   3   2 3114.99  301.27
  -5   3  -2 2878.81  351.26
   5  -3   2 3255.87  318.27
   5   5   2  249.38  113.89
   5  -5  -2  349.67  108.19
   5  -5   2  232.48   98.19
  -5   5   2  309.07  138.59
   6   0   2 3073.09  298.47
   6   0  -2 2857.91  309.47
  -6   0  -2 2741.63  308.17
   6   2   2  976.10  150.08
   6  -2  -2  929.31  157.68
   6   2  -2  817.22  150.48
   6  -2   2  643.04  128.59
   6  -4  -2  655.53  146.19
   6   4   2  546.45  133.89
  -6   4   2  888.61  176.08
   6  -4   2  674.43  135.99
   7  -1  -2    2.80  104.19
   7   1   2  120.39  106.19
   7   1  -2  211.08  133.99
   7  -1   2   88.99   97.59
   7   3   2  243.88  124.69
   7  -3  -2  522.15  142.19
   7   3  -2  195.58  148.39
   7  -3   2  277.57  137.29
   7   5   2  707.93  196.58
   7  -5  -2  784.02  188.18
   7  -5   2  947.81  219.38
   8   0  -2  -41.20  134.69
   8   0   2 -151.08  113.59
   8  -2  -2   19.50  138.89
   8  -2   2  -21.60  137.39
   8   2  -2   24.30  154.18
   9  -1  -2   23.60  158.88
   9   1   2  224.98  171.88
   9   1  -2  100.89  196.88
   9  -1   2  196.98  157.78
   0   0  -3   20.70   42.10
   0   2  -3   78.79   73.49
   0   4  -3   30.70  136.49
  -1   1  -3  439.46   84.79
  -1  -1  -3  538.05   72.19
  -1   3  -3  -19.10   97.39
   1   3  -3  -31.90   88.19
  -2   0  -3  -54.39   54.79
  -2   2  -3 3153.98  322.57
   2  -2  -3 3331.57  304.77
   3  -1  -3 3526.05  322.07
  -3   1  -3 3450.35  337.87
   3   1   3 3385.56  308.17
  -3  -1  -3 3429.96  317.37
   3  -1   3 3525.15  321.17
   3  -3  -3   48.90   53.59
  -3   3  -3    8.60  135.69
  -4   0  -3   67.59   82.19
   4   0   3   30.20   52.89
   4   0  -3 -100.49   67.19
  -4   2  -3  859.41  152.08
   4  -2  -3  628.04  110.19
   4   2   3  745.83  101.89
   4  -2   3  847.92  131.39
   4   4   3  737.83   95.79
   4  -4  -3  750.02  130.79
  -5   1  -3  119.99  120.09
   5  -1  -3  223.28   99.29
   5   1   3  119.29   77.29
   5   1  -3  232.38  110.89
   5  -1   3  278.77   94.69
  -5  -1  -3  149.29   89.29
   5   3   3  248.78   80.29
   5  -3  -3  -49.40   93.19
   5  -3   3  272.37   95.99
   5  -5  -3  183.28  119.09
   6   0   3   31.70   85.79
   6   0  -3  179.38  119.69
  -6   0  -3 -139.69  132.69
   6   2   3  151.18   98.79
   6  -2  -3  239.78  115.59
   6  -2   3  215.88  114.79
   6   2  -3  -97.89  140.09
   6   4   3   90.09  118.49
   6  -4  -3  270.47  136.29
   6  -4   3  174.08  140.29
   7   1   3 1189.28  180.18
   7  -1  -3 1077.89  233.08
   7  -1   3 1016.80  179.18
   7   1  -3 1008.20  211.88
   7   3   3  103.49  135.09
   7  -3   3   62.39  123.99
   7   3  -3   75.49  152.78
   8   0  -3  151.58  187.38
   8   0   3   -5.10  146.69
   0   0  -4 3879.01  353.86
   0   2  -4  445.36  113.09
  -1   1  -4  265.97   93.89
   1  -1  -4  335.67   62.69
  -1  -1  -4  289.37   67.49
   1   1  -4  240.28   88.29
  -2   0  -4  107.79   82.49
  -2   2  -4   11.10  125.29
  -3   1  -4  124.49  123.59
   3  -1  -4  282.97   90.69
  -3  -1  -4  -72.49   89.79
  -4   0  -4 1194.58  205.28
   4   0  -4  855.31  162.98
   4  -2  -4  287.77  102.79
   5   1   4  903.51  138.59
   5  -1  -4  408.86  163.18
   5   1  -4  522.55  186.18
   5  -1   4  452.35  126.29
   5  -3  -4 1640.54  240.18
   6   0   4 1611.64  236.78
   6   0  -4 1420.46  260.67
   6   2   4  204.38  111.89
   6  -2  -4  116.79  160.08
   6  -2   4  162.68  141.89
   6   2  -4  682.83  206.38
   1  -1  -5  179.68   93.29
   3  -1  -5 1570.84  258.77
   0   0   0    0.00    0.00

_computing_structure_solution     'SHELXT 2014/5 (Sheldrick, 2014)'
;
_shelx_hkl_checksum   92917

_publcif_info_exptl_table_max_cols 4
_publcif_info_exptl_table_use_headnotes n


loop_
_publcif_info_datablock.id
_publcif_info_datablock.publ_exptl
_publcif_info_datablock.publ_geom
_publcif_info_datablock.structure
'{fbae0774-d52c-4f66-b6cf-fa92db58e290}' y y y

loop_
_publcif_info_exptl_table_extra_item
sin_theta_over_lambda_max

loop_
_publcif_info_exptl_table_header_item
?

loop_
_publcif_info_tables.block_id
_publcif_info_tables.reference_item
"{fbae0774-d52c-4f66-b6cf-fa92db58e290}" "_publcif_info_datablock.publ_exptl"

loop_
_publcif_info_cif.paper_type
 EX


_publcif_funding_html
;
;
