# Supplementary material
Source: MDPI journal article supplement (https://www.mdpi.com/2075-4701/14/3/337)
Supplement: s1 [file s1 › Al12.48Fe6.52.cif]

data_20221017_a

_audit_update_record
;
2023-11-23 # Formatted by publCIF

;
_publcif_datablock.id '{60555ba9-acce-4048-b7e6-86ad8acf89ab}'

_publ_section_exptl_refinement
;
(type here to add)
;

_publ_section_exptl_prep
;
(type here to add)
;

_publ_manuscript_text
;
(type here to add)
;
 
_audit_creation_method            'SHELXL-2016/6'
_shelx_SHELXL_version_number      '2016/6'
_chemical_name_systematic         ?
_chemical_name_common             ?
_chemical_melting_point           ?
_chemical_formula_moiety          ?
_chemical_formula_sum
 'Al3.12 Fe1.63' 
_chemical_formula_weight          175.19

loop_
 _atom_type_symbol
 _atom_type_description
 _atom_type_scat_dispersion_real
 _atom_type_scat_dispersion_imag
 _atom_type_scat_source
 'Al'  'Al'   0.0645   0.0514
 'International Tables Vol C Tables 4.2.6.8 and 6.1.1.4'
 'Fe'  'Fe'   0.3463   0.8444
 'International Tables Vol C Tables 4.2.6.8 and 6.1.1.4'
 
_space_group_crystal_system       triclinic
_space_group_IT_number            2
_space_group_name_H-M_alt         'P -1'
_space_group_name_Hall            '-P 1'
 
_shelx_space_group_comment
;
The symmetry employed for this shelxl refinement is uniquely defined
by the following loop, which should always be used as a source of
symmetry information in preference to the above space-group names.
They are only intended as comments.
;
 
loop_
 _space_group_symop_operation_xyz
 'x, y, z'
 '-x, -y, -z'
 
_cell_length_a                    4.8569(5)
_cell_length_b                    6.4389(7)
_cell_length_c                    8.7323(10)
_cell_angle_alpha                 87.837(4)
_cell_angle_beta                  74.463(4)
_cell_angle_gamma                 83.060(4)
_cell_volume                      261.18(5)
_cell_formula_units_Z             4
_cell_measurement_temperature     300(2)
_cell_measurement_reflns_used     2588
_cell_measurement_theta_min       2.42
_cell_measurement_theta_max       27.45
 
_exptl_crystal_description        Lump
_exptl_crystal_colour             drak
_exptl_crystal_density_meas       ?
_exptl_crystal_density_method     ?
_exptl_crystal_density_diffrn     4.455          
_exptl_crystal_F_000              332
_exptl_transmission_factor_min    ?
_exptl_transmission_factor_max    ?
_exptl_crystal_size_max           0.08
_exptl_crystal_size_mid           0.06
_exptl_crystal_size_min           0.03
_exptl_absorpt_coefficient_mu     9.803
_shelx_estimated_absorpt_T_min    ?
_shelx_estimated_absorpt_T_max    ?
_exptl_absorpt_correction_type    multi-scan
_exptl_absorpt_correction_T_min   0.5330
_exptl_absorpt_correction_T_max   0.7456
_exptl_absorpt_process_details    ?
_diffrn_ambient_temperature       300(2)
_diffrn_radiation_wavelength      0.71073
_diffrn_radiation_type            MoK\a
_diffrn_source                    ?
_diffrn_measurement_device_type   'Bruker D8 Venture Photon 100 CMOS'
_diffrn_measurement_method        ?
_diffrn_detector_area_resol_mean  ?
_diffrn_reflns_number             7202
_diffrn_reflns_av_unetI/netI      0.0692
_diffrn_reflns_av_R_equivalents   0.0957
_diffrn_reflns_limit_h_min        -6
_diffrn_reflns_limit_h_max        6
_diffrn_reflns_limit_k_min        -8
_diffrn_reflns_limit_k_max        8
_diffrn_reflns_limit_l_min        -11
_diffrn_reflns_limit_l_max        11
_diffrn_reflns_theta_min          2.421
_diffrn_reflns_theta_max          27.571
_diffrn_reflns_theta_full         25.242
_diffrn_measured_fraction_theta_max   0.998
_diffrn_measured_fraction_theta_full  1.000
_diffrn_reflns_Laue_measured_fraction_max    0.998
_diffrn_reflns_Laue_measured_fraction_full   1.000
_diffrn_reflns_point_group_measured_fraction_max   0.998
_diffrn_reflns_point_group_measured_fraction_full  1.000
_reflns_number_total              1210
_reflns_number_gt                 907
_reflns_threshold_expression      'I > 2\s(I)'
_reflns_Friedel_coverage          0.000
_reflns_Friedel_fraction_max      .
_reflns_Friedel_fraction_full     .
 
_reflns_special_details
;
 Reflections were merged by SHELXL according to the crystal
 class for the calculation of statistics and refinement.
 
 _reflns_Friedel_fraction is defined as the number of unique
 Friedel pairs measured divided by the number that would be
 possible theoretically, ignoring centric projections and
 systematic absences.
;
 
_computing_data_collection        ?
_computing_cell_refinement        ?
_computing_data_reduction         ?
_computing_structure_solution     'SHELXT 2014/5 (Sheldrick, 2014)'
_computing_structure_refinement 'SHELXL-2016/6 (Sheldrick, 2016)'
_computing_molecular_graphics     ?
_computing_publication_material   ?
_refine_special_details           ?
_refine_ls_structure_factor_coef  Fsqd
_refine_ls_matrix_type            full
_refine_ls_weighting_scheme       calc
_refine_ls_weighting_details
'w=1/[\s^2^(Fo^2^)+5.6782P] where P=(Fo^2^+2Fc^2^)/3'
_atom_sites_solution_primary      ?
_atom_sites_solution_secondary    ?
_atom_sites_solution_hydrogens    .
_refine_ls_hydrogen_treatment     undef
_refine_ls_extinction_method      none
_refine_ls_extinction_coef        .
_refine_ls_number_reflns          1210
_refine_ls_number_parameters      89
_refine_ls_number_restraints      0
_refine_ls_R_factor_all           0.0831
_refine_ls_R_factor_gt            0.0543
_refine_ls_wR_factor_ref          0.1044
_refine_ls_wR_factor_gt           0.0960
_refine_ls_goodness_of_fit_ref    1.057
_refine_ls_restrained_S_all       1.057
_refine_ls_shift/su_max           0.000
_refine_ls_shift/su_mean          0.000
 
loop_
 _atom_site_label
 _atom_site_type_symbol
 _atom_site_fract_x
 _atom_site_fract_y
 _atom_site_fract_z
 _atom_site_U_iso_or_equiv
 _atom_site_adp_type
 _atom_site_occupancy
 _atom_site_site_symmetry_order  
 _atom_site_calc_flag
 _atom_site_refinement_flags_posn
 _atom_site_refinement_flags_adp
 _atom_site_refinement_flags_occupancy
 _atom_site_disorder_assembly
 _atom_site_disorder_group
Fe1 Fe 0.1425(3) 0.15847(19) 0.41690(14) 0.0066(3) Uani 1 1 d . . . . .
Fe2 Fe 0.2296(3) 0.3508(2) 0.87451(15) 0.0102(3) Uani 1 1 d . . . . .
Fe3 Fe 0.000000 0.000000 0.000000 0.0083(4) Uani 1 2 d S . P . .
Fe4A Fe 0.1640(3) 0.4744(2) 0.59039(18) 0.0115(5) Uani 0.758(12) 1 d . . P A 1
Al4B Al 0.1640(3) 0.4744(2) 0.59039(18) 0.0115(5) Uani 0.242(12) 1 d . . P A 2
Al1 Al 0.4915(6) 0.0106(4) 0.1650(3) 0.0129(6) Uani 1 1 d . . . . .
Al2 Al 0.0430(6) 0.1158(5) 0.7096(3) 0.0136(6) Uani 1 1 d . . . . .
Al3 Al 0.5994(6) 0.1853(4) 0.5254(3) 0.0140(6) Uani 1 1 d . . . . .
Al4 Al 0.0150(6) 0.2924(4) 0.1691(3) 0.0123(6) Uani 1 1 d . . . . .
Al5 Al 0.3101(5) 0.6634(4) 0.0348(3) 0.0078(6) Uani 1 1 d . . . . .
Al6 Al 0.4198(6) 0.4451(4) 0.2983(3) 0.0102(6) Uani 1 1 d . . . . .
 
loop_
 _atom_site_aniso_label
 _atom_site_aniso_U_11
 _atom_site_aniso_U_22
 _atom_site_aniso_U_33
 _atom_site_aniso_U_23
 _atom_site_aniso_U_13
 _atom_site_aniso_U_12
Fe1 0.0045(6) 0.0054(6) 0.0087(6) 0.0002(5) 0.0007(5) -0.0014(5)
Fe2 0.0057(6) 0.0141(7) 0.0117(7) 0.0007(5) -0.0015(5) -0.0065(5)
Fe3 0.0061(9) 0.0065(9) 0.0104(9) -0.0001(7) 0.0012(7) -0.0012(7)
Fe4A 0.0113(9) 0.0114(9) 0.0120(8) -0.0031(6) -0.0040(6) 0.0008(6)
Al4B 0.0113(9) 0.0114(9) 0.0120(8) -0.0031(6) -0.0040(6) 0.0008(6)
Al1 0.0103(14) 0.0140(15) 0.0143(14) 0.0024(11) -0.0017(11) -0.0059(11)
Al2 0.0093(13) 0.0221(16) 0.0103(13) 0.0000(11) -0.0013(11) -0.0084(12)
Al3 0.0106(14) 0.0108(14) 0.0224(16) 0.0027(12) -0.0075(12) -0.0025(11)
Al4 0.0111(13) 0.0132(14) 0.0133(14) -0.0009(11) -0.0053(11) 0.0009(11)
Al5 0.0027(12) 0.0085(14) 0.0117(13) -0.0008(10) -0.0010(10) -0.0001(10)
Al6 0.0112(13) 0.0079(13) 0.0113(13) 0.0029(10) -0.0009(11) -0.0065(11)
 
_geom_special_details
;
 All esds (except the esd in the dihedral angle between two l.s. planes)
 are estimated using the full covariance matrix.  The cell esds are taken
 into account individually in the estimation of esds in distances, angles
 and torsion angles; correlations between esds in cell parameters are only
 used when they are defined by crystal symmetry.  An approximate (isotropic)
 treatment of cell esds is used for estimating esds involving l.s. planes.
;
 
loop_
 _geom_bond_atom_site_label_1
 _geom_bond_atom_site_label_2
 _geom_bond_distance
 _geom_bond_site_symmetry_2
 _geom_bond_publ_flag
Fe1 Al6 2.450(3) . ?
Fe1 Al2 2.482(3) . ?
Fe1 Al2 2.493(3) 2_556 ?
Fe1 Al4 2.502(3) . ?
Fe1 Al3 2.512(3) 2_656 ?
Fe1 Al1 2.528(3) . ?
Fe1 Al3 2.540(3) 1_455 ?
Fe1 Fe4A 2.6101(19) . ?
Fe1 Al4B 2.6101(19) . ?
Fe1 Fe4A 2.6454(19) 2_566 ?
Fe1 Al3 2.661(3) . ?
Fe1 Fe1 2.751(2) 2_556 ?
Fe2 Al6 2.433(3) 2_666 ?
Fe2 Al4 2.520(3) 2_566 ?
Fe2 Al2 2.525(3) . ?
Fe2 Al1 2.533(3) 2_656 ?
Fe2 Al4 2.535(3) 1_556 ?
Fe2 Al5 2.539(3) 2_566 ?
Fe2 Al5 2.554(3) 2_666 ?
Fe2 Al5 2.620(3) 1_556 ?
Fe2 Fe4A 2.665(2) . ?
Fe2 Al4B 2.665(2) . ?
Fe2 Fe3 2.7042(13) 1_556 ?
Fe3 Al4 2.456(3) . ?
Fe3 Al4 2.456(3) 2 ?
Fe3 Al1 2.498(3) 2_655 ?
Fe3 Al1 2.498(3) 1_455 ?
Fe3 Al5 2.542(3) 2_565 ?
Fe3 Al5 2.542(3) 1_545 ?
Fe3 Al2 2.577(3) 1_554 ?
Fe3 Al2 2.577(3) 2_556 ?
Fe4A Fe4A 2.514(3) 2_566 ?
Fe4A Al4 2.523(3) 2_566 ?
Fe4A Al6 2.523(3) . ?
Fe4A Al2 2.565(3) . ?
Fe4A Al6 2.578(3) 2_666 ?
Fe4A Al3 2.597(3) . ?
Fe4A Al3 2.639(3) 2_666 ?
Fe4A Al6 2.731(3) 2_566 ?
Al4B Al4 2.523(3) 2_566 ?
Al4B Al6 2.523(3) . ?
Al4B Al2 2.565(3) . ?
Al4B Al6 2.578(3) 2_666 ?
Al4B Al3 2.597(3) . ?
Al4B Al3 2.639(3) 2_666 ?
Al4B Al6 2.731(3) 2_566 ?
Al1 Al2 2.742(4) 2_556 ?
Al1 Al4 2.756(4) . ?
Al1 Al5 2.773(4) 2_665 ?
Al1 Al2 2.790(4) 2_656 ?
Al1 Al1 2.868(6) 2_655 ?
Al1 Al5 2.875(4) 1_545 ?
Al1 Al3 2.887(4) 2_656 ?
Al2 Al5 2.746(4) 2_566 ?
Al2 Al4 2.814(4) 2_556 ?
Al2 Al3 2.828(4) . ?
Al2 Al3 2.927(4) 2_656 ?
Al3 Al3 2.773(6) 2_656 ?
Al3 Al6 2.795(4) . ?
Al3 Al6 2.862(4) 2_666 ?
Al4 Al5 2.666(4) 2_565 ?
Al4 Al6 2.800(4) . ?
Al4 Al6 2.872(4) 1_455 ?
Al4 Al5 2.975(4) . ?
Al5 Al5 2.600(5) 2_665 ?
Al5 Al6 2.790(4) . ?
Al5 Al6 2.925(4) 2_665 ?
 
loop_
 _geom_angle_atom_site_label_1
 _geom_angle_atom_site_label_2
 _geom_angle_atom_site_label_3
 _geom_angle
 _geom_angle_site_symmetry_1
 _geom_angle_site_symmetry_3
 _geom_angle_publ_flag
Al6 Fe1 Al2 116.50(10) . . ?
Al6 Fe1 Al2 130.57(10) . 2_556 ?
Al2 Fe1 Al2 112.86(8) . 2_556 ?
Al6 Fe1 Al4 68.87(10) . . ?
Al2 Fe1 Al4 153.10(11) . . ?
Al2 Fe1 Al4 68.58(10) 2_556 . ?
Al6 Fe1 Al3 119.65(10) . 2_656 ?
Al2 Fe1 Al3 71.75(10) . 2_656 ?
Al2 Fe1 Al3 73.66(10) 2_556 2_656 ?
Al4 Fe1 Al3 130.65(10) . 2_656 ?
Al6 Fe1 Al1 74.57(9) . . ?
Al2 Fe1 Al1 139.99(11) . . ?
Al2 Fe1 Al1 66.21(10) 2_556 . ?
Al4 Fe1 Al1 66.45(9) . . ?
Al3 Fe1 Al1 69.90(10) 2_656 . ?
Al6 Fe1 Al3 125.83(10) . 1_455 ?
Al2 Fe1 Al3 73.37(10) . 1_455 ?
Al2 Fe1 Al3 71.10(10) 2_556 1_455 ?
Al4 Fe1 Al3 82.46(10) . 1_455 ?
Al3 Fe1 Al3 114.00(8) 2_656 1_455 ?
Al1 Fe1 Al3 133.82(11) . 1_455 ?
Al6 Fe1 Fe4A 59.73(8) . . ?
Al2 Fe1 Fe4A 60.43(8) . . ?
Al2 Fe1 Fe4A 161.93(9) 2_556 . ?
Al4 Fe1 Fe4A 109.30(8) . . ?
Al3 Fe1 Fe4A 116.18(9) 2_656 . ?
Al1 Fe1 Fe4A 130.50(9) . . ?
Al3 Fe1 Fe4A 90.84(8) 1_455 . ?
Al6 Fe1 Al4B 59.73(8) . . ?
Al2 Fe1 Al4B 60.43(8) . . ?
Al2 Fe1 Al4B 161.93(9) 2_556 . ?
Al4 Fe1 Al4B 109.30(8) . . ?
Al3 Fe1 Al4B 116.18(9) 2_656 . ?
Al1 Fe1 Al4B 130.50(9) . . ?
Al3 Fe1 Al4B 90.84(8) 1_455 . ?
Al6 Fe1 Fe4A 64.70(8) . 2_566 ?
Al2 Fe1 Fe4A 98.44(9) . 2_566 ?
Al2 Fe1 Fe4A 110.79(9) 2_556 2_566 ?
Al4 Fe1 Fe4A 58.63(7) . 2_566 ?
Al3 Fe1 Fe4A 170.17(9) 2_656 2_566 ?
Al1 Fe1 Fe4A 119.82(9) . 2_566 ?
Al3 Fe1 Fe4A 61.14(8) 1_455 2_566 ?
Fe4A Fe1 Fe4A 57.15(6) . 2_566 ?
Al6 Fe1 Al3 66.17(9) . . ?
Al2 Fe1 Al3 66.62(10) . . ?
Al2 Fe1 Al3 136.32(10) 2_556 . ?
Al4 Fe1 Al3 132.32(10) . . ?
Al3 Fe1 Al3 64.75(11) 2_656 . ?
Al1 Fe1 Al3 86.87(10) . . ?
Al3 Fe1 Al3 138.09(13) 1_455 . ?
Fe4A Fe1 Al3 59.02(7) . . ?
Al4B Fe1 Al3 59.02(7) . . ?
Fe4A Fe1 Al3 112.41(8) 2_566 . ?
Al6 Fe1 Fe1 172.73(10) . 2_556 ?
Al2 Fe1 Fe1 56.62(8) . 2_556 ?
Al2 Fe1 Fe1 56.23(8) 2_556 2_556 ?
Al4 Fe1 Fe1 118.27(10) . 2_556 ?
Al3 Fe1 Fe1 57.48(8) 2_656 2_556 ?
Al1 Fe1 Fe1 108.99(9) . 2_556 ?
Al3 Fe1 Fe1 56.52(8) 1_455 2_556 ?
Fe4A Fe1 Fe1 114.60(7) . 2_556 ?
Fe4A Fe1 Fe1 117.00(8) 2_566 2_556 ?
Al3 Fe1 Fe1 107.31(9) . 2_556 ?
Al6 Fe2 Al4 70.85(10) 2_666 2_566 ?
Al6 Fe2 Al2 109.89(10) 2_666 . ?
Al4 Fe2 Al2 103.05(10) 2_566 . ?
Al6 Fe2 Al1 100.14(10) 2_666 2_656 ?
Al4 Fe2 Al1 164.07(10) 2_566 2_656 ?
Al2 Fe2 Al1 66.96(10) . 2_656 ?
Al6 Fe2 Al4 138.91(10) 2_666 1_556 ?
Al4 Fe2 Al4 101.94(9) 2_566 1_556 ?
Al2 Fe2 Al4 111.12(11) . 1_556 ?
Al1 Fe2 Al4 93.44(10) 2_656 1_556 ?
Al6 Fe2 Al5 140.24(11) 2_666 2_566 ?
Al4 Fe2 Al5 72.03(9) 2_566 2_566 ?
Al2 Fe2 Al5 65.66(9) . 2_566 ?
Al1 Fe2 Al5 112.17(10) 2_656 2_566 ?
Al4 Fe2 Al5 63.37(9) 1_556 2_566 ?
Al6 Fe2 Al5 67.98(10) 2_666 2_666 ?
Al4 Fe2 Al5 117.22(10) 2_566 2_666 ?
Al2 Fe2 Al5 134.49(10) . 2_666 ?
Al1 Fe2 Al5 68.83(9) 2_656 2_666 ?
Al4 Fe2 Al5 81.57(9) 1_556 2_666 ?
Al5 Fe2 Al5 144.92(13) 2_566 2_666 ?
Al6 Fe2 Al5 70.65(9) 2_666 1_556 ?
Al4 Fe2 Al5 62.44(9) 2_566 1_556 ?
Al2 Fe2 Al5 164.91(11) . 1_556 ?
Al1 Fe2 Al5 128.12(10) 2_656 1_556 ?
Al4 Fe2 Al5 70.47(9) 1_556 1_556 ?
Al5 Fe2 Al5 103.81(8) 2_566 1_556 ?
Al5 Fe2 Al5 60.32(10) 2_666 1_556 ?
Al6 Fe2 Fe4A 60.54(8) 2_666 . ?
Al4 Fe2 Fe4A 58.15(7) 2_566 . ?
Al2 Fe2 Fe4A 59.15(8) . . ?
Al1 Fe2 Fe4A 106.09(8) 2_656 . ?
Al4 Fe2 Fe4A 149.93(9) 1_556 . ?
Al5 Fe2 Fe4A 87.82(8) 2_566 . ?
Al5 Fe2 Fe4A 126.52(9) 2_666 . ?
Al5 Fe2 Fe4A 111.52(8) 1_556 . ?
Al6 Fe2 Al4B 60.54(8) 2_666 . ?
Al4 Fe2 Al4B 58.15(7) 2_566 . ?
Al2 Fe2 Al4B 59.15(8) . . ?
Al1 Fe2 Al4B 106.09(8) 2_656 . ?
Al4 Fe2 Al4B 149.93(9) 1_556 . ?
Al5 Fe2 Al4B 87.82(8) 2_566 . ?
Al5 Fe2 Al4B 126.52(9) 2_666 . ?
Al5 Fe2 Al4B 111.52(8) 1_556 . ?
Al6 Fe2 Fe3 156.42(9) 2_666 1_556 ?
Al4 Fe2 Fe3 129.92(8) 2_566 1_556 ?
Al2 Fe2 Fe3 58.92(7) . 1_556 ?
Al1 Fe2 Fe3 56.87(7) 2_656 1_556 ?
Al4 Fe2 Fe3 55.79(7) 1_556 1_556 ?
Al5 Fe2 Fe3 57.91(6) 2_566 1_556 ?
Al5 Fe2 Fe3 103.98(7) 2_666 1_556 ?
Al5 Fe2 Fe3 126.03(8) 1_556 1_556 ?
Fe4A Fe2 Fe3 117.15(6) . 1_556 ?
Al4 Fe3 Al4 180.0 . 2 ?
Al4 Fe3 Al1 96.28(9) . 2_655 ?
Al4 Fe3 Al1 83.72(9) 2 2_655 ?
Al4 Fe3 Al1 83.72(9) . 1_455 ?
Al4 Fe3 Al1 96.28(9) 2 1_455 ?
Al1 Fe3 Al1 180.00(18) 2_655 1_455 ?
Al4 Fe3 Al5 64.43(9) . 2_565 ?
Al4 Fe3 Al5 115.57(9) 2 2_565 ?
Al1 Fe3 Al5 113.25(9) 2_655 2_565 ?
Al1 Fe3 Al5 66.75(9) 1_455 2_565 ?
Al4 Fe3 Al5 115.57(9) . 1_545 ?
Al4 Fe3 Al5 64.43(9) 2 1_545 ?
Al1 Fe3 Al5 66.75(9) 2_655 1_545 ?
Al1 Fe3 Al5 113.25(9) 1_455 1_545 ?
Al5 Fe3 Al5 180.0 2_565 1_545 ?
Al4 Fe3 Al2 112.05(9) . 1_554 ?
Al4 Fe3 Al2 67.95(9) 2 1_554 ?
Al1 Fe3 Al2 66.70(9) 2_655 1_554 ?
Al1 Fe3 Al2 113.30(9) 1_455 1_554 ?
Al5 Fe3 Al2 64.87(9) 2_565 1_554 ?
Al5 Fe3 Al2 115.13(9) 1_545 1_554 ?
Al4 Fe3 Al2 67.95(9) . 2_556 ?
Al4 Fe3 Al2 112.05(9) 2 2_556 ?
Al1 Fe3 Al2 113.30(9) 2_655 2_556 ?
Al1 Fe3 Al2 66.70(9) 1_455 2_556 ?
Al5 Fe3 Al2 115.13(9) 2_565 2_556 ?
Al5 Fe3 Al2 64.87(9) 1_545 2_556 ?
Al2 Fe3 Al2 180.00(17) 1_554 2_556 ?
Al4 Fe3 Fe2 121.38(7) . 2_556 ?
Al4 Fe3 Fe2 58.62(7) 2 2_556 ?
Al1 Fe3 Fe2 121.89(7) 2_655 2_556 ?
Al1 Fe3 Fe2 58.11(7) 1_455 2_556 ?
Al5 Fe3 Fe2 122.21(7) 2_565 2_556 ?
Al5 Fe3 Fe2 57.79(7) 1_545 2_556 ?
Al2 Fe3 Fe2 122.92(7) 1_554 2_556 ?
Al2 Fe3 Fe2 57.08(7) 2_556 2_556 ?
Al4 Fe3 Fe2 58.62(7) . 1_554 ?
Al4 Fe3 Fe2 121.38(7) 2 1_554 ?
Al1 Fe3 Fe2 58.11(7) 2_655 1_554 ?
Al1 Fe3 Fe2 121.89(7) 1_455 1_554 ?
Al5 Fe3 Fe2 57.79(7) 2_565 1_554 ?
Al5 Fe3 Fe2 122.21(7) 1_545 1_554 ?
Al2 Fe3 Fe2 57.08(7) 1_554 1_554 ?
Al2 Fe3 Fe2 122.92(7) 2_556 1_554 ?
Fe2 Fe3 Fe2 180.0 2_556 1_554 ?
Fe4A Fe4A Al4 111.75(10) 2_566 2_566 ?
Fe4A Fe4A Al6 65.67(9) 2_566 . ?
Al4 Fe4A Al6 147.05(11) 2_566 . ?
Fe4A Fe4A Al2 99.76(11) 2_566 . ?
Al4 Fe4A Al2 101.85(10) 2_566 . ?
Al6 Fe4A Al2 111.02(10) . . ?
Fe4A Fe4A Al6 155.41(12) 2_566 2_666 ?
Al4 Fe4A Al6 68.52(9) 2_566 2_666 ?
Al6 Fe4A Al6 100.18(9) . 2_666 ?
Al2 Fe4A Al6 104.25(10) . 2_666 ?
Fe4A Fe4A Al3 119.27(10) 2_566 . ?
Al4 Fe4A Al3 128.80(10) 2_566 . ?
Al6 Fe4A Al3 66.16(10) . . ?
Al2 Fe4A Al3 66.45(10) . . ?
Al6 Fe4A Al3 67.16(9) 2_666 . ?
Fe4A Fe4A Fe1 62.13(7) 2_566 . ?
Al4 Fe4A Fe1 153.69(9) 2_566 . ?
Al6 Fe4A Fe1 56.98(7) . . ?
Al2 Fe4A Fe1 57.31(7) . . ?
Al6 Fe4A Fe1 128.56(9) 2_666 . ?
Al3 Fe4A Fe1 61.47(7) . . ?
Fe4A Fe4A Al3 90.75(10) 2_566 2_666 ?
Al4 Fe4A Al3 80.11(10) 2_566 2_666 ?
Al6 Fe4A Al3 67.30(10) . 2_666 ?
Al2 Fe4A Al3 167.57(11) . 2_666 ?
Al6 Fe4A Al3 64.80(9) 2_666 2_666 ?
Al3 Fe4A Al3 102.62(9) . 2_666 ?
Fe1 Fe4A Al3 123.91(9) . 2_666 ?
Fe4A Fe4A Fe1 60.72(6) 2_566 2_566 ?
Al4 Fe4A Fe1 57.84(7) 2_566 2_566 ?
Al6 Fe4A Fe1 98.40(8) . 2_566 ?
Al2 Fe4A Fe1 133.94(9) . 2_566 ?
Al6 Fe4A Fe1 104.43(8) 2_666 2_566 ?
Al3 Fe4A Fe1 159.37(10) . 2_566 ?
Fe1 Fe4A Fe1 122.85(6) . 2_566 ?
Al3 Fe4A Fe1 57.45(7) 2_666 2_566 ?
Fe4A Fe4A Fe2 147.26(10) 2_566 . ?
Al4 Fe4A Fe2 58.04(7) 2_566 . ?
Al6 Fe4A Fe2 141.22(9) . . ?
Al2 Fe4A Fe2 57.70(8) . . ?
Al6 Fe4A Fe2 55.26(7) 2_666 . ?
Al3 Fe4A Fe2 76.03(8) . . ?
Fe1 Fe4A Fe2 111.81(7) . . ?
Al3 Fe4A Fe2 115.24(9) 2_666 . ?
Fe1 Fe4A Fe2 115.64(6) 2_566 . ?
Fe4A Fe4A Al6 57.33(8) 2_566 2_566 ?
Al4 Fe4A Al6 64.27(9) 2_566 2_566 ?
Al6 Fe4A Al6 123.00(8) . 2_566 ?
Al2 Fe4A Al6 79.90(10) . 2_566 ?
Al6 Fe4A Al6 132.35(12) 2_666 2_566 ?
Al3 Fe4A Al6 145.42(11) . 2_566 ?
Fe1 Fe4A Al6 94.19(8) . 2_566 ?
Al3 Fe4A Al6 111.63(10) 2_666 2_566 ?
Fe1 Fe4A Al6 54.18(7) 2_566 2_566 ?
Fe2 Fe4A Al6 93.10(8) . 2_566 ?
Al4 Al4B Al6 147.05(11) 2_566 . ?
Al4 Al4B Al2 101.85(10) 2_566 . ?
Al6 Al4B Al2 111.02(10) . . ?
Al4 Al4B Al6 68.52(9) 2_566 2_666 ?
Al6 Al4B Al6 100.18(9) . 2_666 ?
Al2 Al4B Al6 104.25(10) . 2_666 ?
Al4 Al4B Al3 128.80(10) 2_566 . ?
Al6 Al4B Al3 66.16(10) . . ?
Al2 Al4B Al3 66.45(10) . . ?
Al6 Al4B Al3 67.16(9) 2_666 . ?
Al4 Al4B Fe1 153.69(9) 2_566 . ?
Al6 Al4B Fe1 56.98(7) . . ?
Al2 Al4B Fe1 57.31(7) . . ?
Al6 Al4B Fe1 128.56(9) 2_666 . ?
Al3 Al4B Fe1 61.47(7) . . ?
Al4 Al4B Al3 80.11(10) 2_566 2_666 ?
Al6 Al4B Al3 67.30(10) . 2_666 ?
Al2 Al4B Al3 167.57(11) . 2_666 ?
Al6 Al4B Al3 64.80(9) 2_666 2_666 ?
Al3 Al4B Al3 102.62(9) . 2_666 ?
Fe1 Al4B Al3 123.91(9) . 2_666 ?
Al4 Al4B Fe1 57.84(7) 2_566 2_566 ?
Al6 Al4B Fe1 98.40(8) . 2_566 ?
Al2 Al4B Fe1 133.94(9) . 2_566 ?
Al6 Al4B Fe1 104.43(8) 2_666 2_566 ?
Al3 Al4B Fe1 159.37(10) . 2_566 ?
Fe1 Al4B Fe1 122.85(6) . 2_566 ?
Al3 Al4B Fe1 57.45(7) 2_666 2_566 ?
Al4 Al4B Fe2 58.04(7) 2_566 . ?
Al6 Al4B Fe2 141.22(9) . . ?
Al2 Al4B Fe2 57.70(8) . . ?
Al6 Al4B Fe2 55.26(7) 2_666 . ?
Al3 Al4B Fe2 76.03(8) . . ?
Fe1 Al4B Fe2 111.81(7) . . ?
Al3 Al4B Fe2 115.24(9) 2_666 . ?
Fe1 Al4B Fe2 115.64(6) 2_566 . ?
Al4 Al4B Al6 64.27(9) 2_566 2_566 ?
Al6 Al4B Al6 123.00(8) . 2_566 ?
Al2 Al4B Al6 79.90(10) . 2_566 ?
Al6 Al4B Al6 132.35(12) 2_666 2_566 ?
Al3 Al4B Al6 145.42(11) . 2_566 ?
Fe1 Al4B Al6 94.19(8) . 2_566 ?
Al3 Al4B Al6 111.63(10) 2_666 2_566 ?
Fe1 Al4B Al6 54.18(7) 2_566 2_566 ?
Fe2 Al4B Al6 93.10(8) . 2_566 ?
Fe3 Al1 Fe1 143.42(12) 1_655 . ?
Fe3 Al1 Fe2 65.03(7) 1_655 2_656 ?
Fe1 Al1 Fe2 127.40(12) . 2_656 ?
Fe3 Al1 Al2 158.80(14) 1_655 2_556 ?
Fe1 Al1 Al2 56.30(9) . 2_556 ?
Fe2 Al1 Al2 97.04(11) 2_656 2_556 ?
Fe3 Al1 Al4 130.95(13) 1_655 . ?
Fe1 Al1 Al4 56.32(8) . . ?
Fe2 Al1 Al4 153.03(13) 2_656 . ?
Al2 Al1 Al4 61.57(11) 2_556 . ?
Fe3 Al1 Al5 57.39(8) 1_655 2_665 ?
Fe1 Al1 Al5 109.33(11) . 2_665 ?
Fe2 Al1 Al5 119.89(12) 2_656 2_665 ?
Al2 Al1 Al5 133.52(13) 2_556 2_665 ?
Al4 Al1 Al5 73.93(11) . 2_665 ?
Fe3 Al1 Al2 58.00(8) 1_655 2_656 ?
Fe1 Al1 Al2 97.87(11) . 2_656 ?
Fe2 Al1 Al2 56.39(9) 2_656 2_656 ?
Al2 Al1 Al2 122.76(14) 2_556 2_656 ?
Al4 Al1 Al2 148.11(14) . 2_656 ?
Al5 Al1 Al2 101.90(12) 2_665 2_656 ?
Fe3 Al1 Al1 70.43(11) 1_655 2_655 ?
Fe1 Al1 Al1 137.30(17) . 2_655 ?
Fe2 Al1 Al1 85.43(13) 2_656 2_655 ?
Al2 Al1 Al1 98.13(14) 2_556 2_655 ?
Al4 Al1 Al1 81.97(13) . 2_655 ?
Al5 Al1 Al1 61.26(11) 2_665 2_655 ?
Al2 Al1 Al1 124.56(16) 2_656 2_655 ?
Fe3 Al1 Al5 100.70(11) 1_655 1_545 ?
Fe1 Al1 Al5 114.45(11) . 1_545 ?
Fe2 Al1 Al5 55.94(8) 2_656 1_545 ?
Al2 Al1 Al5 58.46(10) 2_556 1_545 ?
Al4 Al1 Al5 97.33(12) . 1_545 ?
Al5 Al1 Al5 119.00(11) 2_665 1_545 ?
Al2 Al1 Al5 111.53(12) 2_656 1_545 ?
Al1 Al1 Al5 57.74(11) 2_655 1_545 ?
Fe3 Al1 Al3 116.80(12) 1_655 2_656 ?
Fe1 Al1 Al3 54.79(8) . 2_656 ?
Fe2 Al1 Al3 73.12(10) 2_656 2_656 ?
Al2 Al1 Al3 64.36(10) 2_556 2_656 ?
Al4 Al1 Al3 107.65(12) . 2_656 ?
Al5 Al1 Al3 148.80(13) 2_665 2_656 ?
Al2 Al1 Al3 59.73(10) 2_656 2_656 ?
Al1 Al1 Al3 149.53(17) 2_655 2_656 ?
Al5 Al1 Al3 92.00(11) 1_545 2_656 ?
Fe1 Al2 Fe1 67.14(8) . 2_556 ?
Fe1 Al2 Fe2 121.48(12) . . ?
Fe1 Al2 Fe2 170.59(14) 2_556 . ?
Fe1 Al2 Fe4A 62.26(8) . . ?
Fe1 Al2 Fe4A 126.26(12) 2_556 . ?
Fe2 Al2 Fe4A 63.14(8) . . ?
Fe1 Al2 Al4B 62.26(8) . . ?
Fe1 Al2 Al4B 126.26(12) 2_556 . ?
Fe2 Al2 Al4B 63.14(8) . . ?
Fe1 Al2 Fe3 168.53(14) . 1_556 ?
Fe1 Al2 Fe3 106.82(11) 2_556 1_556 ?
Fe2 Al2 Fe3 64.00(7) . 1_556 ?
Fe4A Al2 Fe3 126.04(12) . 1_556 ?
Fe1 Al2 Al1 110.66(12) . 2_556 ?
Fe1 Al2 Al1 57.50(9) 2_556 2_556 ?
Fe2 Al2 Al1 118.35(12) . 2_556 ?
Fe4A Al2 Al1 127.72(13) . 2_556 ?
Fe3 Al2 Al1 71.47(9) 1_556 2_556 ?
Fe1 Al2 Al5 134.38(14) . 2_566 ?
Fe1 Al2 Al5 120.34(13) 2_556 2_566 ?
Fe2 Al2 Al5 57.41(9) . 2_566 ?
Fe4A Al2 Al5 85.60(11) . 2_566 ?
Fe3 Al2 Al5 56.96(8) 1_556 2_566 ?
Al1 Al2 Al5 63.19(10) 2_556 2_566 ?
Fe1 Al2 Al1 117.69(12) . 2_656 ?
Fe1 Al2 Al1 117.15(13) 2_556 2_656 ?
Fe2 Al2 Al1 56.65(9) . 2_656 ?
Fe4A Al2 Al1 101.67(12) . 2_656 ?
Fe3 Al2 Al1 55.30(8) 1_556 2_656 ?
Al1 Al2 Al1 122.76(14) 2_556 2_656 ?
Al5 Al2 Al1 98.98(12) 2_566 2_656 ?
Fe1 Al2 Al4 116.65(12) . 2_556 ?
Fe1 Al2 Al4 55.85(9) 2_556 2_556 ?
Fe2 Al2 Al4 114.80(12) . 2_556 ?
Fe4A Al2 Al4 172.83(14) . 2_556 ?
Fe3 Al2 Al4 53.98(8) 1_556 2_556 ?
Al1 Al2 Al4 59.45(10) 2_556 2_556 ?
Al5 Al2 Al4 99.03(12) 2_566 2_556 ?
Al1 Al2 Al4 72.29(11) 2_656 2_556 ?
Fe1 Al2 Al3 59.72(9) . . ?
Fe1 Al2 Al3 109.85(12) 2_556 . ?
Fe2 Al2 Al3 74.27(10) . . ?
Fe4A Al2 Al3 57.31(9) . . ?
Al4B Al2 Al3 57.31(9) . . ?
Fe3 Al2 Al3 116.22(12) 1_556 . ?
Al1 Al2 Al3 167.32(14) 2_556 . ?
Al5 Al2 Al3 129.23(13) 2_566 . ?
Al1 Al2 Al3 61.83(10) 2_656 . ?
Al4 Al2 Al3 115.68(13) 2_556 . ?
Fe1 Al2 Al3 54.60(8) . 2_656 ?
Fe1 Al2 Al3 55.19(8) 2_556 2_656 ?
Fe2 Al2 Al3 125.18(13) . 2_656 ?
Fe4A Al2 Al3 104.52(11) . 2_656 ?
Fe3 Al2 Al3 113.94(12) 1_556 2_656 ?
Al1 Al2 Al3 110.58(13) 2_556 2_656 ?
Al5 Al2 Al3 169.67(15) 2_566 2_656 ?
Al1 Al2 Al3 77.21(11) 2_656 2_656 ?
Al4 Al2 Al3 70.70(10) 2_556 2_656 ?
Al3 Al2 Al3 57.57(11) . 2_656 ?
Fe1 Al3 Fe1 66.00(8) 2_656 1_655 ?
Fe1 Al3 Fe4A 151.72(13) 2_656 . ?
Fe1 Al3 Fe4A 138.41(13) 1_655 . ?
Fe1 Al3 Al4B 151.72(13) 2_656 . ?
Fe1 Al3 Al4B 138.41(13) 1_655 . ?
Fe1 Al3 Fe4A 126.61(12) 2_656 2_666 ?
Fe1 Al3 Fe4A 61.41(8) 1_655 2_666 ?
Fe4A Al3 Fe4A 77.38(9) . 2_666 ?
Fe1 Al3 Fe1 115.25(11) 2_656 . ?
Fe1 Al3 Fe1 138.09(13) 1_655 . ?
Fe4A Al3 Fe1 59.52(7) . . ?
Al4B Al3 Fe1 59.52(7) . . ?
Fe4A Al3 Fe1 109.51(11) 2_666 . ?
Fe1 Al3 Al3 60.23(10) 2_656 2_656 ?
Fe1 Al3 Al3 110.23(15) 1_655 2_656 ?
Fe4A Al3 Al3 108.12(15) . 2_656 ?
Fe4A Al3 Al3 149.41(18) 2_666 2_656 ?
Fe1 Al3 Al3 55.02(10) . 2_656 ?
Fe1 Al3 Al6 147.10(13) 2_656 . ?
Fe1 Al3 Al6 101.27(11) 1_655 . ?
Fe4A Al3 Al6 55.66(8) . . ?
Al4B Al3 Al6 55.66(8) . . ?
Fe4A Al3 Al6 56.54(9) 2_666 . ?
Fe1 Al3 Al6 53.29(8) . . ?
Al3 Al3 Al6 100.78(15) 2_656 . ?
Fe1 Al3 Al2 97.26(12) 2_656 . ?
Fe1 Al3 Al2 162.04(13) 1_655 . ?
Fe4A Al3 Al2 56.24(9) . . ?
Al4B Al3 Al2 56.24(9) . . ?
Fe4A Al3 Al2 133.24(13) 2_666 . ?
Fe1 Al3 Al2 53.66(8) . . ?
Al3 Al3 Al2 62.99(12) 2_656 . ?
Al6 Al3 Al2 96.45(12) . . ?
Fe1 Al3 Al6 121.92(12) 2_656 2_666 ?
Fe1 Al3 Al6 92.66(11) 1_655 2_666 ?
Fe4A Al3 Al6 56.10(9) . 2_666 ?
Al4B Al3 Al6 56.10(9) . 2_666 ?
Fe4A Al3 Al6 54.43(8) 2_666 2_666 ?
Fe1 Al3 Al6 115.57(11) . 2_666 ?
Al3 Al3 Al6 153.28(18) 2_656 2_666 ?
Al6 Al3 Al6 87.52(11) . 2_666 ?
Al2 Al3 Al6 91.01(11) . 2_666 ?
Fe1 Al3 Al1 55.31(8) 2_656 2_656 ?
Fe1 Al3 Al1 104.61(11) 1_655 2_656 ?
Fe4A Al3 Al1 98.37(11) . 2_656 ?
Fe4A Al3 Al1 131.74(13) 2_666 2_656 ?
Fe1 Al3 Al1 108.87(11) . 2_656 ?
Al3 Al3 Al1 78.15(13) 2_656 2_656 ?
Al6 Al3 Al1 152.76(13) . 2_656 ?
Al2 Al3 Al1 58.44(10) . 2_656 ?
Al6 Al3 Al1 82.97(11) 2_666 2_656 ?
Fe1 Al3 Al2 53.65(8) 2_656 2_656 ?
Fe1 Al3 Al2 53.71(8) 1_655 2_656 ?
Fe4A Al3 Al2 146.27(13) . 2_656 ?
Fe4A Al3 Al2 98.83(11) 2_666 2_656 ?
Fe1 Al3 Al2 91.70(11) . 2_656 ?
Al3 Al3 Al2 59.44(12) 2_656 2_656 ?
Al6 Al3 Al2 93.94(12) . 2_656 ?
Al2 Al3 Al2 122.43(11) . 2_656 ?
Al6 Al3 Al2 146.01(13) 2_666 2_656 ?
Al1 Al3 Al2 108.14(12) 2_656 2_656 ?
Fe3 Al4 Fe1 110.40(11) . . ?
Fe3 Al4 Fe2 119.53(11) . 2_566 ?
Fe1 Al4 Fe2 127.03(11) . 2_566 ?
Fe3 Al4 Fe4A 154.87(13) . 2_566 ?
Fe1 Al4 Fe4A 63.53(8) . 2_566 ?
Fe2 Al4 Fe4A 63.80(8) 2_566 2_566 ?
Fe3 Al4 Fe2 65.59(7) . 1_554 ?
Fe1 Al4 Fe2 142.52(12) . 1_554 ?
Fe2 Al4 Fe2 78.06(9) 2_566 1_554 ?
Fe4A Al4 Fe2 135.03(13) 2_566 1_554 ?
Fe3 Al4 Al5 59.36(8) . 2_565 ?
Fe1 Al4 Al5 154.52(14) . 2_565 ?
Fe2 Al4 Al5 60.61(9) 2_566 2_565 ?
Fe4A Al4 Al5 114.68(12) 2_566 2_565 ?
Fe2 Al4 Al5 58.39(9) 1_554 2_565 ?
Fe3 Al4 Al1 72.99(9) . . ?
Fe1 Al4 Al1 57.22(8) . . ?
Fe2 Al4 Al1 153.28(14) 2_566 . ?
Fe4A Al4 Al1 115.90(12) 2_566 . ?
Fe2 Al4 Al1 87.79(11) 1_554 . ?
Al5 Al4 Al1 129.25(13) 2_565 . ?
Fe3 Al4 Al6 137.25(13) . . ?
Fe1 Al4 Al6 54.69(8) . . ?
Fe2 Al4 Al6 94.70(11) 2_566 . ?
Fe4A Al4 Al6 61.48(9) 2_566 . ?
Fe2 Al4 Al6 101.29(11) 1_554 . ?
Al5 Al4 Al6 149.37(15) 2_565 . ?
Al1 Al4 Al6 65.74(10) . . ?
Fe3 Al4 Al2 58.06(8) . 2_556 ?
Fe1 Al4 Al2 55.57(8) . 2_556 ?
Fe2 Al4 Al2 147.58(14) 2_566 2_556 ?
Fe4A Al4 Al2 104.73(12) 2_566 2_556 ?
Fe2 Al4 Al2 120.19(12) 1_554 2_556 ?
Al5 Al4 Al2 104.05(13) 2_565 2_556 ?
Al1 Al4 Al2 58.98(10) . 2_556 ?
Al6 Al4 Al2 106.22(12) . 2_556 ?
Fe3 Al4 Al6 103.70(11) . 1_455 ?
Fe1 Al4 Al6 100.16(11) . 1_455 ?
Fe2 Al4 Al6 53.15(8) 2_566 1_455 ?
Fe4A Al4 Al6 56.64(8) 2_566 1_455 ?
Fe2 Al4 Al6 117.18(12) 1_554 1_455 ?
Al5 Al4 Al6 63.65(10) 2_565 1_455 ?
Al1 Al4 Al6 151.53(14) . 1_455 ?
Al6 Al4 Al6 117.79(13) . 1_455 ?
Al2 Al4 Al6 94.74(12) 2_556 1_455 ?
Fe3 Al4 Al5 121.46(11) . . ?
Fe1 Al4 Al5 112.19(11) . . ?
Fe2 Al4 Al5 54.28(8) 2_566 . ?
Fe4A Al4 Al5 81.65(10) 2_566 . ?
Fe2 Al4 Al5 56.09(8) 1_554 . ?
Al5 Al4 Al5 91.92(11) 2_565 . ?
Al1 Al4 Al5 99.03(12) . . ?
Al6 Al4 Al5 57.67(10) . . ?
Al2 Al4 Al5 157.85(13) 2_556 . ?
Al6 Al4 Al5 106.19(12) 1_455 . ?
Fe2 Al5 Fe3 64.30(7) 2_566 1_565 ?
Fe2 Al5 Fe2 144.92(12) 2_566 2_666 ?
Fe3 Al5 Fe2 124.09(11) 1_565 2_666 ?
Fe2 Al5 Al5 124.30(16) 2_566 2_665 ?
Fe3 Al5 Al5 160.17(17) 1_565 2_665 ?
Fe2 Al5 Al5 61.09(11) 2_666 2_665 ?
Fe2 Al5 Fe2 76.19(8) 2_566 1_554 ?
Fe3 Al5 Fe2 112.78(10) 1_565 1_554 ?
Fe2 Al5 Fe2 119.68(10) 2_666 1_554 ?
Al5 Al5 Fe2 58.60(10) 2_665 1_554 ?
Fe2 Al5 Al4 58.24(9) 2_566 2_565 ?
Fe3 Al5 Al4 56.21(8) 1_565 2_565 ?
Fe2 Al5 Al4 156.79(13) 2_666 2_565 ?
Al5 Al5 Al4 110.70(16) 2_665 2_565 ?
Fe2 Al5 Al4 56.95(9) 1_554 2_565 ?
Fe2 Al5 Al2 56.93(9) 2_566 2_566 ?
Fe3 Al5 Al2 58.17(8) 1_565 2_566 ?
Fe2 Al5 Al2 96.45(11) 2_666 2_566 ?
Al5 Al5 Al2 141.51(18) 2_665 2_566 ?
Fe2 Al5 Al2 131.86(12) 1_554 2_566 ?
Al4 Al5 Al2 100.93(12) 2_565 2_566 ?
Fe2 Al5 Al1 117.73(11) 2_566 2_665 ?
Fe3 Al5 Al1 55.86(8) 1_565 2_665 ?
Fe2 Al5 Al1 87.05(10) 2_666 2_665 ?
Al5 Al5 Al1 108.47(15) 2_665 2_665 ?
Fe2 Al5 Al1 111.39(11) 1_554 2_665 ?
Al4 Al5 Al1 74.84(11) 2_565 2_665 ?
Al2 Al5 Al1 100.38(12) 2_566 2_665 ?
Fe2 Al5 Al6 94.53(11) 2_566 . ?
Fe3 Al5 Al6 133.93(12) 1_565 . ?
Fe2 Al5 Al6 53.94(8) 2_666 . ?
Al5 Al5 Al6 65.64(12) 2_665 . ?
Fe2 Al5 Al6 99.47(10) 1_554 . ?
Al4 Al5 Al6 145.90(14) 2_565 . ?
Al2 Al5 Al6 75.87(11) 2_566 . ?
Al1 Al5 Al6 139.25(13) 2_665 . ?
Fe2 Al5 Al1 113.24(11) 2_566 1_565 ?
Fe3 Al5 Al1 69.74(8) 1_565 1_565 ?
Fe2 Al5 Al1 55.23(8) 2_666 1_565 ?
Al5 Al5 Al1 115.52(16) 2_665 1_565 ?
Fe2 Al5 Al1 169.63(12) 1_554 1_565 ?
Al4 Al5 Al1 123.37(13) 2_565 1_565 ?
Al2 Al5 Al1 58.35(10) 2_566 1_565 ?
Al1 Al5 Al1 61.01(11) 2_665 1_565 ?
Al6 Al5 Al1 84.47(11) . 1_565 ?
Fe2 Al5 Al6 115.18(11) 2_566 2_665 ?
Fe3 Al5 Al6 100.05(10) 1_565 2_665 ?
Fe2 Al5 Al6 97.56(10) 2_666 2_665 ?
Al5 Al5 Al6 60.31(11) 2_665 2_665 ?
Fe2 Al5 Al6 51.68(7) 1_554 2_665 ?
Al4 Al5 Al6 61.61(10) 2_565 2_665 ?
Al2 Al5 Al6 158.19(13) 2_566 2_665 ?
Al1 Al5 Al6 63.85(9) 2_665 2_665 ?
Al6 Al5 Al6 125.94(10) . 2_665 ?
Al1 Al5 Al6 118.35(12) 1_565 2_665 ?
Fe2 Al5 Al4 53.69(8) 2_566 . ?
Fe3 Al5 Al4 117.97(10) 1_565 . ?
Fe2 Al5 Al4 108.13(11) 2_666 . ?
Al5 Al5 Al4 72.87(13) 2_665 . ?
Fe2 Al5 Al4 53.44(8) 1_554 . ?
Al4 Al5 Al4 88.08(11) 2_565 . ?
Al2 Al5 Al4 87.24(11) 2_566 . ?
Al1 Al5 Al4 162.29(13) 2_665 . ?
Al6 Al5 Al4 58.02(9) . . ?
Al1 Al5 Al4 135.25(12) 1_565 . ?
Al6 Al5 Al4 104.08(11) 2_665 . ?
Fe2 Al6 Fe1 163.09(13) 2_666 . ?
Fe2 Al6 Fe4A 131.82(12) 2_666 . ?
Fe1 Al6 Fe4A 63.29(8) . . ?
Fe2 Al6 Al4B 131.82(12) 2_666 . ?
Fe1 Al6 Al4B 63.29(8) . . ?
Fe2 Al6 Fe4A 64.20(8) 2_666 2_666 ?
Fe1 Al6 Fe4A 118.82(12) . 2_666 ?
Fe4A Al6 Fe4A 79.82(9) . 2_666 ?
Fe2 Al6 Fe4A 130.89(12) 2_666 2_566 ?
Fe1 Al6 Fe4A 61.12(7) . 2_566 ?
Fe4A Al6 Fe4A 57.00(8) . 2_566 ?
Fe4A Al6 Fe4A 132.35(12) 2_666 2_566 ?
Fe2 Al6 Al5 58.08(8) 2_666 . ?
Fe1 Al6 Al5 120.54(12) . . ?
Fe4A Al6 Al5 131.27(12) . . ?
Al4B Al6 Al5 131.27(12) . . ?
Fe4A Al6 Al5 120.52(12) 2_666 . ?
Fe4A Al6 Al5 81.68(10) 2_566 . ?
Fe2 Al6 Al3 117.74(12) 2_666 . ?
Fe1 Al6 Al3 60.54(9) . . ?
Fe4A Al6 Al3 58.18(9) . . ?
Al4B Al6 Al3 58.18(9) . . ?
Fe4A Al6 Al3 58.66(9) 2_666 . ?
Fe4A Al6 Al3 105.85(11) 2_566 . ?
Al5 Al6 Al3 170.50(13) . . ?
Fe2 Al6 Al4 117.75(12) 2_666 . ?
Fe1 Al6 Al4 56.44(9) . . ?
Fe4A Al6 Al4 103.00(11) . . ?
Al4B Al6 Al4 103.00(11) . . ?
Fe4A Al6 Al4 170.74(14) 2_666 . ?
Fe4A Al6 Al4 54.26(8) 2_566 . ?
Al5 Al6 Al4 64.31(10) . . ?
Al3 Al6 Al4 115.12(13) . . ?
Fe2 Al6 Al3 75.00(10) 2_666 2_666 ?
Fe1 Al6 Al3 121.21(12) . 2_666 ?
Fe4A Al6 Al3 58.27(9) . 2_666 ?
Fe4A Al6 Al3 56.74(8) 2_666 2_666 ?
Fe4A Al6 Al3 81.93(10) 2_566 2_666 ?
Al5 Al6 Al3 94.34(11) . 2_666 ?
Al3 Al6 Al3 92.48(11) . 2_666 ?
Al4 Al6 Al3 132.26(13) . 2_666 ?
Fe2 Al6 Al4 56.00(9) 2_666 1_655 ?
Fe1 Al6 Al4 110.67(12) . 1_655 ?
Fe4A Al6 Al4 125.35(12) . 1_655 ?
Fe4A Al6 Al4 54.84(8) 2_666 1_655 ?
Fe4A Al6 Al4 170.44(13) 2_566 1_655 ?
Al5 Al6 Al4 99.83(11) . 1_655 ?
Al3 Al6 Al4 71.78(11) . 1_655 ?
Al4 Al6 Al4 117.79(13) . 1_655 ?
Al3 Al6 Al4 107.28(12) 2_666 1_655 ?
Fe2 Al6 Al5 57.66(8) 2_666 2_665 ?
Fe1 Al6 Al5 106.87(11) . 2_665 ?
Fe4A Al6 Al5 170.01(13) . 2_665 ?
Fe4A Al6 Al5 104.93(11) 2_666 2_665 ?
Fe4A Al6 Al5 121.04(11) 2_566 2_665 ?
Al5 Al6 Al5 54.06(10) . 2_665 ?
Al3 Al6 Al5 116.47(12) . 2_665 ?
Al4 Al6 Al5 70.96(10) . 2_665 ?
Al3 Al6 Al5 131.69(12) 2_666 2_665 ?
Al4 Al6 Al5 54.74(9) 1_655 2_665 ?
 
_refine_diff_density_max    1.724
_refine_diff_density_min   -1.173
_refine_diff_density_rms    0.287

_shelx_res_file
;
TITL 20221017_a.res in P-1
    20221017_a.res
    created by SHELXL-2016/6 at 08:52:02 on 28-Jun-2023
REM Old TITL 20221017 in P-1

REM SHELXT solution in P-1
REM R1 0.098,  Rweak 0.008,  Alpha 0.069,  Orientation as input
REM Formula found by SHELXT:  Al12 Fe7

CELL  0.71073   4.8569   6.4389   8.7323   87.837   74.463   83.060
ZERR    4.000   0.0005   0.0007   0.0010    0.004    0.004    0.004
LATT  1
SFAC AL FE
UNIT 12.4832 6.5168
ACTA
TEMP 26.840
L.S. 20
REM BOND $H
LIST 4
FMAP 2
EADP FE4A  AL4B
EXYZ FE4A  AL4B
PLAN 20
acta
WGHT    0.000000    5.678200
FVAR       0.49132   0.75840
FE1   2    0.142512    0.158468    0.416899    11.00000    0.00448    0.00539 =
         0.00869    0.00017    0.00072   -0.00138
FE2   2    0.229644    0.350761    0.874514    11.00000    0.00569    0.01406 =
         0.01169    0.00071   -0.00149   -0.00647
FE3   2    0.000000    0.000000    0.000000    10.50000    0.00615    0.00650 =
         0.01040   -0.00010    0.00122   -0.00115
PART 1
FE4A  2    0.164037    0.474391    0.590388    21.00000    0.01133    0.01141 =
         0.01200   -0.00305   -0.00395    0.00083
PART 2
AL4B  1    0.164037    0.474391    0.590388   -21.00000    0.01133    0.01141 =
         0.01200   -0.00305   -0.00395    0.00083
PART 0
AL1   1    0.491504    0.010589    0.164984    11.00000    0.01034    0.01401 =
         0.01428    0.00235   -0.00165   -0.00591
AL2   1    0.042986    0.115819    0.709648    11.00000    0.00928    0.02207 =
         0.01027   -0.00001   -0.00131   -0.00845
AL3   1    0.599353    0.185310    0.525351    11.00000    0.01056    0.01080 =
         0.02241    0.00267   -0.00746   -0.00250
AL4   1    0.015038    0.292440    0.169067    11.00000    0.01114    0.01322 =
         0.01329   -0.00093   -0.00528    0.00095
AL5   1    0.310119    0.663450    0.034847    11.00000    0.00270    0.00854 =
         0.01170   -0.00080   -0.00101   -0.00008
AL6   1    0.419779    0.445104    0.298264    11.00000    0.01125    0.00785 =
         0.01128    0.00291   -0.00086   -0.00652
HKLF 4


REM  20221017_a.res in P-1
REM R1 =  0.0543 for     907 Fo > 4sig(Fo)  and  0.0831 for all    1210 data
REM     89 parameters refined using      0 restraints

END

WGHT      0.0081      6.0153

REM Highest difference peak  1.724,  deepest hole -1.173,  1-sigma level  0.287
Q1    1   0.2224 -0.1033  0.7187  11.00000  0.05    1.72
Q2    1   0.4893  0.1455  0.0822  11.00000  0.05    1.50
Q3    1  -0.0852  0.2423  0.6927  11.00000  0.05    1.40
Q4    1   0.3329  0.0148  0.6567  11.00000  0.05    1.38
Q5    1   0.2221  0.5684  0.0426  11.00000  0.05    1.24
Q6    1   0.1715  0.5352  0.5207  11.00000  0.05    1.17
Q7    1   0.3477  0.0213  0.1239  11.00000  0.05    1.16
Q8    1   0.6151  0.3042  0.4983  11.00000  0.05    1.13
Q9    1  -0.1574  0.1268  0.8141  11.00000  0.05    1.08
Q10   1   0.5088  0.6520  0.2654  11.00000  0.05    1.05
Q11   1  -0.2182  0.1414  0.7485  11.00000  0.05    1.05
Q12   1   0.4248  0.4171  0.2225  11.00000  0.05    1.02
Q13   1   0.1832  0.3645  0.2699  11.00000  0.05    1.00
Q14   1  -0.0040  0.4483  0.9021  11.00000  0.05    0.99
Q15   1   0.0000  0.5000  1.0000  10.50000  0.05    0.98
Q16   1   0.2782  0.2748  0.8007  11.00000  0.05    0.90
Q17   1  -0.0544  0.5583  0.6458  11.00000  0.05    0.85
Q18   1   0.2414 -0.1510 -0.0618  11.00000  0.05    0.85
Q19   1   0.0564  0.4097  0.1788  11.00000  0.05    0.84
Q20   1   0.3853  0.2353  0.3691  11.00000  0.05    0.84
;
_shelx_res_checksum   80275

_shelx_hkl_file
;
  -1   0   0  712.53   49.20
  -1   0   0  757.02   47.20
  -1   0   0  786.92   47.40
   1   0   0  760.02   47.30
   1   0   0  766.12   47.50
   1   0   0  667.63   49.60
  -2   0   0   25.50    4.70
  -2   0   0   22.50    4.90
  -2   0   0    9.40   14.50
   2   0   0   13.60   14.20
   2   0   0   23.90   10.10
   2   0   0   23.80    5.30
   2   0   0   20.50    4.40
  -3   0   0  157.98   14.50
  -3   0   0  139.79   23.30
  -3   0   0  145.79   20.40
  -3   0   0  147.29   14.10
   3   0   0  146.99   14.60
   3   0   0  152.48   32.30
   3   0   0  137.49   13.40
   3   0   0  141.09   24.80
  -4   0   0   61.59   11.90
  -4   0   0   37.30   21.60
  -4   0   0   68.69   19.90
   4   0   0   60.59   11.20
   4   0   0   78.89   30.70
   4   0   0   58.59   14.20
   4   0   0  107.09   45.20
  -5   0   0  172.68   28.30
  -5   0   0  300.97   47.60
  -5   0   0  210.88   32.90
  -5   0   0  276.47   36.00
   5   0   0  194.08   29.50
  -6   0   0  196.68   61.19
   6   0   0   26.40   54.09
   6   0   0  114.19   30.50
   5  -1   0  -13.80   17.60
   5  -1   0   28.10   14.80
  -5   1   0   34.40   18.80
  -5   1   0   38.40   30.80
   4  -1   0    2.40    9.30
   4  -1   0   62.49   31.20
   4  -1   0    5.40   40.20
   4  -1   0    2.60   10.20
  -4   1   0  -17.50   19.80
  -4   1   0    3.70   11.30
   3  -1   0   52.39   10.30
   3  -1   0   23.00   36.70
   3  -1   0   52.59    9.00
   3  -1   0   61.79   10.90
   3  -1   0   47.10   18.60
  -3   1   0   56.89    9.00
  -3   1   0   72.59   16.50
  -3   1   0   49.60    8.80
  -3   1   0   43.50    7.40
   2  -1   0 4791.62  295.57
   2  -1   0 4952.50  296.07
   2  -1   0 4401.46  298.87
  -2   1   0 4612.74  294.77
  -2   1   0 4807.02  295.67
   1  -1   0 1085.79   67.79
   1  -1   0 1067.09   68.99
   1  -1   0  934.81   67.99
   1  -1   0 1091.09   67.09
  -1   1   0 1089.59   67.69
  -1   1   0 1126.79   68.69
   0  -1   0   26.10    3.30
   0  -1   0   25.10    5.00
   0  -1   0   27.70    4.20
   0  -1   0   31.80    3.60
   0  -1   0   25.80    5.50
   0   1   0   31.90    3.30
   0   1   0   27.50    3.30
   0   1   0   26.10    4.40
   0   1   0   26.70    5.70
  -1  -1   0  275.07   24.00
  -1  -1   0  283.47   18.50
  -1  -1   0  267.67   22.00
  -1  -1   0  290.37   19.60
   1   1   0  268.57   21.90
   1   1   0  295.77   19.60
   1   1   0  268.97   24.20
   1   1   0  283.67   18.70
  -2  -1   0   -0.30   12.00
  -2  -1   0    1.30    3.80
  -2  -1   0    0.80    4.80
   2   1   0  -15.30   15.80
   2   1   0   -7.20    9.90
   2   1   0    2.30    4.60
  -3  -1   0   79.69   13.40
  -3  -1   0   98.29   12.00
  -3  -1   0  153.28   25.30
   3   1   0   86.19   13.40
   3   1   0  125.69   30.80
   3   1   0  105.59   22.00
  -4  -1   0  212.68   23.00
  -4  -1   0  228.68   41.20
  -4  -1   0  180.28   21.20
   4   1   0  139.89   50.49
   4   1   0  263.77   38.20
   4   1   0  228.78   23.50
  -5  -1   0  138.39   25.50
  -5  -1   0  114.59   36.00
  -5  -1   0  157.08   39.90
  -5  -1   0  128.19   23.50
   5   1   0  118.19   23.20
  -6  -1   0   18.90   43.20
   6   1   0  122.69   31.00
   6   1   0  159.08   56.99
   5  -2   0   94.29   19.30
   5  -2   0  206.18   74.89
   5  -2   0  105.39   24.00
  -5   2   0  162.98   38.20
   4  -2   0  349.67   36.60
   4  -2   0  395.46   62.09
   4  -2   0  399.36   31.80
   4  -2   0  373.06   31.20
   4  -2   0  342.37   47.70
  -4   2   0  387.96   32.10
  -4   2   0  404.36   39.20
   3  -2   0    7.80   14.40
   3  -2   0   31.60   24.40
   3  -2   0    9.00    7.70
   3  -2   0    4.40    6.90
   3  -2   0   35.90   27.50
  -3   2   0   17.10   13.40
  -3   2   0    3.90    8.50
   2  -2   0  659.93   50.19
   2  -2   0  680.13   51.09
   2  -2   0  669.83   49.10
   2  -2   0  742.03   47.20
   2  -2   0  733.83   57.39
   2  -2   0  715.13   46.00
  -2   2   0  754.12   49.50
  -2   2   0  704.13   47.20
   1  -2   0   76.69   11.80
   1  -2   0   73.89   11.60
   1  -2   0   75.99    8.00
   1  -2   0   76.69    9.00
   1  -2   0   69.39   14.70
  -1   2   0   96.19   17.10
   0  -2   0  144.79   12.40
   0  -2   0  143.49   15.60
   0  -2   0  129.79   14.70
   0  -2   0  127.79   12.50
   0  -2   0  141.59   11.20
   0  -2   0  123.99   10.80
   0   2   0  133.29   10.90
   0   2   0  107.09   14.00
   0   2   0  148.49   10.80
  -1  -2   0   30.60    6.40
  -1  -2   0   26.50    6.70
  -1  -2   0   15.80   10.30
  -1  -2   0   33.40   13.40
   1   2   0   28.20    5.90
   1   2   0   20.00    6.00
   1   2   0   23.70    8.70
   1   2   0   17.50   12.60
  -2  -2   0  -11.90    6.70
  -2  -2   0    1.70    4.50
  -2  -2   0  -17.50   15.60
   2   2   0   17.50   19.90
   2   2   0   -2.70    5.00
   2   2   0   -0.80   10.60
  -3  -2   0  650.03   55.19
  -3  -2   0  561.34   40.70
  -3  -2   0  590.04   42.60
   3   2   0  566.14   50.29
   3   2   0  636.74   43.00
   3   2   0  493.95   60.69
  -4  -2   0  171.98   23.20
  -4  -2   0  165.68   20.40
  -4  -2   0  227.38   38.20
   4   2   0  168.98   34.00
   4   2   0  167.98   54.39
   4   2   0  127.49   21.50
  -5  -2   0  248.58   32.60
  -5  -2   0  413.96   62.29
   5   2   0  190.38   39.30
  -6  -2   0  384.46   80.59
  -6  -2   0  530.95   76.99
   6   2   0  498.65   73.59
   6   2   0  453.55   52.99
   5  -3   0   -6.10   21.50
   5  -3   0    6.40   19.10
   4  -3   0  870.61   61.39
   4  -3   0  764.32   77.59
   4  -3   0  723.03   53.19
   4  -3   0  792.92   55.29
   4  -3   0  639.14   67.79
   3  -3   0 1062.29   65.49
   3  -3   0  999.20   67.09
   3  -3   0  898.51   74.59
   3  -3   0 1014.90   74.59
   3  -3   0  926.71   86.09
   3  -3   0  999.60   69.79
   2  -3   0   -7.10   22.20
   2  -3   0   41.80    9.20
   2  -3   0   37.80    8.00
   2  -3   0   34.00   18.30
   2  -3   0   15.90   12.50
   1  -3   0  148.39   12.50
   1  -3   0  146.99   19.10
   1  -3   0  146.49   13.30
   1  -3   0  141.19   16.10
   1  -3   0  124.99   17.40
   1  -3   0  132.49   26.50
   1  -3   0  133.09   14.40
  -1   3   0  131.89   23.30
   0  -3   0    6.10    7.40
   0  -3   0    6.70   11.00
   0  -3   0    7.10    8.80
   0  -3   0   12.20   14.30
   0  -3   0    0.60    6.00
   0   3   0    2.40   12.30
   0   3   0    4.20    4.90
   0   3   0  -16.10    9.70
   0   3   0   -0.20    5.10
  -1  -3   0  629.14   46.20
  -1  -3   0  687.63   51.89
  -1  -3   0  661.73   48.50
  -1  -3   0  713.73   45.80
   1   3   0  566.34   51.39
   1   3   0  635.84   42.70
   1   3   0  689.53   47.10
   1   3   0  686.63   44.60
   1   3   0  653.73   47.50
  -2  -3   0    2.10   14.80
  -2  -3   0   -4.20   19.80
  -2  -3   0   10.70    9.40
  -2  -3   0    3.60    8.40
   2   3   0   20.60   14.20
   2   3   0   12.20    5.80
   2   3   0    6.00   23.20
   2   3   0    9.50   10.60
  -3  -3   0  273.77   23.50
  -3  -3   0  255.27   26.20
  -3  -3   0  284.37   43.60
   3   3   0  230.28   29.10
   3   3   0  260.97   47.80
   3   3   0  275.67   24.40
   3   3   0  244.38   36.70
  -4  -3   0 2507.25  166.08
  -4  -3   0 2654.33  168.68
  -4  -3   0 2676.23  181.98
   4   3   0 2636.34  168.78
   4   3   0 2446.36  171.98
  -5  -3   0   73.49   22.50
   5   3   0   74.39   39.90
   5   3   0   11.70   18.50
   4  -4   0   18.20   38.80
   4  -4   0   23.60   41.40
   4  -4   0   34.10   14.40
   4  -4   0   70.39   20.70
   4  -4   0   16.90   35.80
   3  -4   0    1.10   12.80
   3  -4   0   25.20   13.50
   3  -4   0   24.20   20.80
   3  -4   0   41.40   34.40
   3  -4   0   46.40   84.59
   3  -4   0   21.80   11.90
   3  -4   0    2.50   26.60
   2  -4   0  110.19   18.20
   2  -4   0  137.79   19.60
   2  -4   0   92.89   20.40
   2  -4   0  211.58   45.10
   2  -4   0  137.79   15.40
   2  -4   0  154.38   29.60
   2  -4   0  126.79   17.10
   1  -4   0  173.28   19.60
   1  -4   0  208.48   19.20
   1  -4   0  194.38   18.00
   1  -4   0  181.88   23.40
   1  -4   0  158.48   29.60
   1  -4   0  177.88   24.80
   1  -4   0  183.08   23.50
  -1   4   0  196.28   32.90
   0  -4   0   23.40   16.90
   0  -4   0   17.70   10.70
   0  -4   0   20.50   12.10
   0  -4   0   21.20   10.10
   0  -4   0   -1.60   15.50
   0   4   0   25.50    6.40
   0   4   0   17.50   17.50
   0   4   0   10.50    7.70
  -1  -4   0   53.79   20.90
  -1  -4   0   35.50   17.00
  -1  -4   0   57.29   18.50
  -1  -4   0   67.49   12.70
   1   4   0   47.10    9.70
   1   4   0   49.40   23.00
   1   4   0   48.80   15.50
  -2  -4   0 1122.99   87.19
  -2  -4   0 1003.40   80.49
  -2  -4   0 1083.89   75.09
  -2  -4   0 1077.89   73.99
   2   4   0 1093.29   87.69
   2   4   0 1142.39   77.99
   2   4   0 1105.09   77.89
   2   4   0 1080.59   73.49
  -3  -4   0  116.79   36.40
  -3  -4   0  216.08   23.60
   3   4   0   96.59   48.10
   3   4   0  152.18   23.10
   3   4   0  138.49   27.60
   3   4   0  167.28   22.70
  -4  -4   0  -39.30   36.00
  -4  -4   0   52.69   18.20
   4   4   0    2.20   13.30
   4   4   0   23.80   24.20
  -5  -4   0  111.19   63.09
   5   4   0  169.68   41.10
   5   4   0  117.69   26.00
   4  -5   0   37.50   22.20
   4  -5   0  -15.20   24.60
   4  -5   0   28.00   18.20
   3  -5   0   40.50   50.19
   3  -5   0    0.50   14.00
   3  -5   0   12.30   36.90
   3  -5   0   40.70   19.60
   3  -5   0   29.20   14.60
   2  -5   0  129.99   66.59
   2  -5   0  124.09   30.80
   2  -5   0   56.19   32.60
   2  -5   0  142.29   24.70
   2  -5   0   89.09   19.40
   2  -5   0  115.89   20.30
   2  -5   0  141.79   24.00
   1  -5   0  395.16   40.60
   1  -5   0  411.66   36.90
   1  -5   0  282.27   50.59
   1  -5   0  403.36   32.60
   1  -5   0  365.16   38.30
   1  -5   0  379.56   34.20
   1  -5   0  409.16   41.80
   1  -5   0  364.56   33.30
  -1   5   0  376.76   49.10
   0  -5   0    7.40   14.60
   0  -5   0  -17.20   24.20
   0  -5   0   22.30   13.60
   0  -5   0   10.10   19.30
   0  -5   0   23.00   20.70
   0   5   0    8.10   11.20
   0   5   0   -8.70   23.50
  -1  -5   0  101.09   24.00
  -1  -5   0   72.49   18.20
  -1  -5   0   60.99   26.90
  -1  -5   0   90.39   24.50
   1   5   0   69.19   21.70
   1   5   0   89.19   17.40
   1   5   0   80.69   14.90
  -2  -5   0  992.50   76.89
  -2  -5   0  838.62   69.09
  -2  -5   0  947.41   68.99
  -2  -5   0 1070.89   83.79
   2   5   0  946.31   85.39
   2   5   0  953.40   66.39
   2   5   0  989.00   72.89
   2   5   0  934.81   70.99
  -3  -5   0  206.48   48.50
  -3  -5   0  264.17   30.50
   3   5   0  172.78   37.10
   3   5   0  213.68   26.00
   3   5   0  131.89   59.79
   3   5   0  266.07   28.90
  -4  -5   0  -15.20   45.00
   4   5   0   29.30   23.80
   4   5   0   22.70   19.70
  -5  -5   0  -43.10   66.09
   5   5   0  -43.30   36.10
   5   5   0  -20.50   27.20
   3  -6   0  359.86   93.19
   3  -6   0  465.55   41.10
   3  -6   0  392.26   46.70
   2  -6   0  120.39   27.10
   2  -6   0   88.49   23.40
   2  -6   0  127.99   46.70
   2  -6   0  125.79   25.10
   2  -6   0   69.59   39.10
   1  -6   0    5.50   18.70
   1  -6   0   26.80   18.70
   1  -6   0   38.90   24.10
   1  -6   0   36.20   35.50
   1  -6   0   19.50   20.30
   1  -6   0    8.70   18.00
  -1   6   0   31.70   37.80
   0  -6   0 1518.55   99.59
   0  -6   0 1394.76   96.69
   0  -6   0 1651.13  108.09
   0   6   0 1258.07  107.19
   0   6   0 1362.06   94.29
  -1  -6   0  231.78   35.40
  -1  -6   0  254.27   49.80
  -1  -6   0  261.57   40.00
  -1  -6   0  228.58   39.40
   1   6   0  243.38   31.00
   1   6   0  224.38   25.80
   1   6   0  198.08   43.60
  -2  -6   0    1.70   30.90
  -2  -6   0  -18.10   36.00
  -2  -6   0   67.39   29.70
   2   6   0   14.70   15.60
   2   6   0   75.89   50.39
   2   6   0   26.40   26.90
   2   6   0   43.60   25.50
  -3  -6   0   50.49   52.49
  -3  -6   0  121.89   32.90
   3   6   0   65.59   18.90
   3   6   0   49.70   32.10
   3   6   0   51.59   21.20
  -4  -6   0  -50.79   60.89
   4   6   0   26.40   25.70
   4   6   0  -46.40   36.70
   4   6   0   20.20   29.70
   2  -7   0 1025.90   81.89
   2  -7   0 1123.99   83.19
   2  -7   0  959.80   80.99
   1  -7   0  193.18   40.60
   1  -7   0  191.68   33.20
   1  -7   0  220.88   36.20
  -1   7   0  191.38   53.39
   0  -7   0  103.19   30.90
   0  -7   0   92.29   23.70
   0  -7   0  171.98   42.20
   0  -7   0   65.69   27.60
   0   7   0   30.30   43.20
  -1  -7   0  -28.20   47.00
  -1  -7   0   17.30   33.50
   1   7   0  -37.60   25.00
   1   7   0  -24.10   23.70
   1   7   0   48.60   40.20
   1   7   0    4.30   16.40
  -2  -7   0   77.59   89.99
   2   7   0    4.30   57.99
   2   7   0  102.99   35.80
   2   7   0  120.19   42.50
   2   7   0   82.39   25.00
  -3  -7   0   27.70   64.09
   3   7   0    0.70   38.40
   3   7   0   48.10   28.90
   1  -8   0  104.29   49.20
  -1   8   0  134.89   68.19
   0  -8   0   -1.30   25.00
   0  -8   0   17.00   51.49
   0   8   0   64.89   49.50
  -1  -8   0  129.99   60.09
   1   8   0   35.40   58.59
  -2  -8   0  -87.39   65.09
   2   8   0   33.40   53.49
   2   8   0   54.19   31.60
   2   8  -1  196.38   59.49
  -2  -8   1  143.19   66.79
   1   8  -1    0.70   55.69
  -1  -8   1  108.49   47.30
  -1  -8   1    6.30   64.09
   0   8  -1  505.95   87.39
   0  -8   1  595.64   75.49
   0  -8   1  558.14   88.49
  -1   8  -1  -48.70   60.59
   1  -8   1  104.79   34.50
   1  -8   1  -51.79   50.29
   3   7  -1  143.79   42.70
   3   7  -1   55.19   27.80
  -3  -7   1   33.20   57.09
   2   7  -1 1257.77   91.89
   2   7  -1 1222.68  107.29
  -2  -7   1 1430.36  111.99
  -2  -7   1 1524.45  125.79
   1   7  -1  392.76   38.70
   1   7  -1  475.65   64.69
   1   7  -1  400.36   37.50
   1   7  -1  284.27   47.60
  -1  -7   1  548.45   64.09
  -1  -7   1  471.55   71.79
   0   7  -1  -24.70   22.90
   0   7  -1   14.10   39.00
   0  -7   1   24.80   31.10
   0  -7   1  -38.50   26.30
   0  -7   1   -2.80   37.70
  -1   7  -1  231.78   51.99
   1  -7   1  191.88   34.00
   1  -7   1  229.58   35.50
   1  -7   1  217.18   37.50
   1  -7   1  246.08   44.90
   2  -7   1   53.99   26.90
   2  -7   1   20.70   32.90
   2  -7   1   55.29   28.80
   2  -7   1   60.69   28.60
   4   6  -1  809.52   72.39
   4   6  -1  832.12   71.19
   4   6  -1  931.11   89.19
  -4  -6   1 1220.08  113.49
   3   6  -1  258.57   51.99
   3   6  -1  246.58   36.30
  -3  -6   1  293.07   73.59
  -3  -6   1  330.27   63.49
  -3  -6   1  224.28   42.20
   2   6  -1   17.60   25.60
   2   6  -1  -14.90   46.00
   2   6  -1   -6.90   14.80
   2   6  -1  -18.20   27.80
  -2  -6   1  -21.00   41.40
  -2  -6   1    3.50   31.30
  -2  -6   1  -27.10   29.60
   1   6  -1  224.28   33.70
   1   6  -1  252.17   34.70
   1   6  -1  258.87   26.50
   1   6  -1  271.57   45.30
  -1  -6   1  394.06   43.00
  -1  -6   1  326.27   44.90
  -1  -6   1  255.07   35.30
  -1  -6   1  285.97   46.90
   0   6  -1  -19.20   31.40
   0   6  -1   25.20   17.10
   0  -6   1    9.40   21.10
   0  -6   1  -26.50   17.40
   0  -6   1   11.10   31.90
  -1   6  -1  212.38   44.10
   1  -6   1  226.08   28.20
   1  -6   1  219.88   31.50
   1  -6   1  207.68   27.40
   1  -6   1  140.19   31.20
   1  -6   1  257.37   50.59
  -2   6  -1  -19.30   58.09
   2  -6   1   52.79   19.90
   2  -6   1   19.00   19.30
   2  -6   1   84.69   27.90
   2  -6   1   25.70   55.59
   2  -6   1   46.80   24.30
   2  -6   1   37.40   25.30
   3  -6   1   78.89   22.60
   3  -6   1  107.69   28.00
   3  -6   1   31.20   20.60
   3  -6   1  144.09   40.40
   5   5  -1  296.67   49.20
   5   5  -1  383.96   63.39
  -5  -5   1  320.47   83.59
   4   5  -1   71.49   30.80
   4   5  -1   47.50   22.80
  -4  -5   1  179.88   58.59
   3   5  -1  -10.10   15.30
   3   5  -1    5.20   16.40
   3   5  -1   20.30   57.09
  -3  -5   1   26.30   18.30
  -3  -5   1    8.40   33.00
  -3  -5   1  -28.50   43.20
   2   5  -1   39.40   22.20
   2   5  -1   71.99   15.50
   2   5  -1   45.40   42.20
   2   5  -1   70.69   23.40
  -2  -5   1   87.99   28.70
  -2  -5   1   72.59   22.10
  -2  -5   1   67.29   35.40
  -2  -5   1   77.79   23.30
   1   5  -1   66.89   22.20
   1   5  -1  106.09   19.10
   1   5  -1   83.69   14.60
  -1  -5   1  109.39   19.50
  -1  -5   1   41.00   29.20
  -1  -5   1   54.89   22.00
  -1  -5   1   61.39   23.30
   0   5  -1  168.98   21.80
   0   5  -1  198.88   35.20
   0  -5   1  156.78   29.80
   0  -5   1  220.78   27.40
   0  -5   1  175.78   22.60
   0  -5   1  169.48   33.80
  -1   5  -1   28.80   25.50
   1  -5   1   57.59   15.00
   1  -5   1   55.19   26.10
   1  -5   1   43.80   15.50
   1  -5   1   54.19   23.90
   1  -5   1   44.30   29.60
   1  -5   1   73.59   23.40
   1  -5   1   77.49   14.00
  -2   5  -1    5.00   34.30
   2  -5   1  129.59   42.80
   2  -5   1   30.50   20.70
   2  -5   1   17.00   12.90
   2  -5   1   29.20   32.60
   2  -5   1    8.70   12.50
   2  -5   1   12.20   15.90
   2  -5   1   61.19   29.50
   2  -5   1   19.20   16.80
   3  -5   1   11.90   13.80
   3  -5   1   22.80   17.10
   3  -5   1   29.50   16.00
   3  -5   1    8.30   31.00
   3  -5   1    0.30   16.60
   3  -5   1   51.79   51.39
   4  -5   1  700.63   58.79
   4  -5   1  688.73   51.29
   4  -5   1  724.53   58.79
   4  -5   1  809.32   91.69
   5   4  -1  272.07   38.80
  -5  -4   1  237.58   67.99
   4   4  -1  282.27   42.00
  -4  -4   1  386.06   70.79
   3   4  -1   39.10   27.50
   3   4  -1  112.09   18.50
   3   4  -1  130.49   22.40
   3   4  -1   81.59   50.69
  -3  -4   1   56.39   29.00
  -3  -4   1   80.29   16.50
  -3  -4   1   87.29   37.80
  -3  -4   1   98.29   16.90
   2   4  -1   26.30   18.80
   2   4  -1  -50.89   31.70
   2   4  -1    4.70   10.10
   2   4  -1   11.20   14.20
  -2  -4   1    5.30   21.00
  -2  -4   1   21.10   13.20
  -2  -4   1   48.10   28.10
  -2  -4   1   33.20   14.40
   1   4  -1   28.60   14.20
   1   4  -1   14.80   12.60
   1   4  -1  -22.10   23.00
   1   4  -1   30.90    8.70
  -1  -4   1   25.30   15.20
  -1  -4   1   41.40   12.20
  -1  -4   1   38.10   20.40
  -1  -4   1   28.60   14.40
   0   4  -1   57.59   12.00
   0   4  -1   57.09   18.70
   0  -4   1   68.49   15.20
   0  -4   1   69.49   11.40
   0  -4   1   53.29   16.30
   0  -4   1   14.20   16.80
   0  -4   1   95.69   22.60
  -1   4  -1  557.44   52.69
   1  -4   1  607.54   43.30
   1  -4   1  476.45   42.90
   1  -4   1  637.64   52.89
   1  -4   1  625.64   40.20
   1  -4   1  619.44   48.60
   1  -4   1  640.74   42.30
   1  -4   1  565.84   46.90
   2  -4   1 3043.10  197.28
   2  -4   1 3211.28  204.18
   2  -4   1 2920.31  207.28
   2  -4   1 3089.49  198.58
   2  -4   1 3250.17  201.48
   3  -4   1  141.79   49.50
   3  -4   1  104.99   18.30
   3  -4   1   79.09   16.50
   3  -4   1   85.29   13.50
   3  -4   1  121.69   39.40
   3  -4   1  162.18   27.80
   4  -4   1  127.59   36.00
   4  -4   1   63.09   13.40
   4  -4   1   52.59   18.00
   4  -4   1  -13.60   54.19
   5  -4   1  288.77   60.19
   5  -4   1  205.38   37.70
   5   3  -1   11.60   19.90
  -5  -3   1  -10.70   49.80
   4   3  -1    3.60   13.00
  -4  -3   1   16.10   18.30
  -4  -3   1   41.40   35.50
  -4  -3   1   -5.60   13.30
   3   3  -1    7.50   19.80
   3   3  -1  -24.70   41.20
   3   3  -1   13.20    9.50
  -3  -3   1   -0.10   26.70
  -3  -3   1   -2.30   13.10
  -3  -3   1    3.00   10.40
  -3  -3   1   14.80   22.20
   2   3  -1    0.50    7.20
   2   3  -1   41.40   16.60
   2   3  -1    6.50    7.60
   2   3  -1    6.70   27.70
  -2  -3   1   11.00   20.00
  -2  -3   1   10.60    9.20
  -2  -3   1   19.00    8.30
  -2  -3   1   -9.20   17.60
   1   3  -1   91.09   16.30
   1   3  -1   74.39   10.10
   1   3  -1   71.49   10.80
   1   3  -1   82.39   21.80
  -1  -3   1   73.89   13.40
  -1  -3   1  109.89   18.50
  -1  -3   1   61.89   18.80
   0   3  -1 4308.57  252.57
   0   3  -1 3976.00  255.47
   0   3  -1 4165.68  254.27
   0   3  -1 3650.03  253.07
   0   3  -1 4145.39  257.57
   0  -3   1 4106.69  253.57
   0  -3   1 3666.93  256.57
   0  -3   1 4206.58  255.27
  -1   3  -1   -9.90   12.80
   1  -3   1   11.40    6.90
   1  -3   1    7.20   11.90
   1  -3   1   -8.70   16.10
   2  -3   1   86.39   12.70
   2  -3   1   77.19   12.20
   2  -3   1   43.10   23.60
   2  -3   1   63.19   17.50
   2  -3   1  121.09   22.50
  -3   3  -1  576.34   44.80
   3  -3   1  519.85   62.99
   3  -3   1  449.46   44.50
   3  -3   1  562.84   39.10
   3  -3   1  597.94   44.70
   3  -3   1  522.15   36.30
   3  -3   1  560.54   52.49
  -4   3  -1  172.28   33.70
   4  -3   1  114.59   18.50
   4  -3   1  181.98   41.30
   4  -3   1  164.88   28.60
   4  -3   1  150.78   20.60
  -5   3  -1  100.89   40.50
   5  -3   1  103.09   46.00
   5  -3   1   51.39   20.40
   5  -3   1   38.30   22.20
   5   2  -1   68.09   22.10
  -5  -2   1   49.00   50.79
  -5  -2   1    5.00   23.90
   4   2  -1   22.80   29.90
   4   2  -1   70.09   16.00
  -4  -2   1   70.59   16.40
  -4  -2   1   80.99   15.80
  -4  -2   1  114.09   35.10
   3   2  -1  328.47   58.69
   3   2  -1  352.36   28.40
   3   2  -1  309.67   39.30
  -3  -2   1  367.96   27.60
  -3  -2   1  319.67   28.40
  -3  -2   1  324.37   45.00
   2   2  -1   28.10   13.00
   2   2  -1   20.80    7.30
   2   2  -1   -0.70   24.30
   2   2  -1   23.90    7.10
  -2  -2   1   26.40    8.50
  -2  -2   1   22.70   13.70
  -2  -2   1   19.20    7.90
  -2  -2   1    5.40   16.50
   1   2  -1   12.40    4.80
   1   2  -1   -2.30   14.20
   1   2  -1    3.90    8.60
  -1  -2   1    5.70   12.50
  -1  -2   1   18.30    9.10
  -1  -2   1    7.20    5.80
  -1  -2   1   16.70    5.90
   0   2  -1   95.19    9.80
   0   2  -1   83.39   10.10
   0   2  -1   85.59    9.90
   0   2  -1   88.99   14.00
   0   2  -1   91.19    7.40
   0  -2   1   92.49   10.50
   0  -2   1   86.69   10.70
   0  -2   1   88.59    8.20
   0  -2   1   75.69   13.60
   0  -2   1  100.29   13.40
  -1   2  -1   68.19   14.70
  -1   2  -1   46.10   10.00
   1  -2   1   75.09   11.30
   1  -2   1   59.09   12.40
   1  -2   1   69.09    8.90
   1  -2   1   75.69   15.10
  -2   2  -1  271.57   23.30
   2  -2   1  246.88   27.40
   2  -2   1  266.07   23.40
   2  -2   1  245.38   19.40
   2  -2   1  287.77   31.20
  -3   2  -1   50.49   15.70
   3  -2   1   -8.10   21.20
   3  -2   1   26.50   11.30
   3  -2   1    5.90    7.30
   3  -2   1   48.80   26.10
   3  -2   1   14.90   18.10
  -4   2  -1  103.09   25.70
   4  -2   1   63.49   36.40
   4  -2   1  106.79   15.50
   4  -2   1  115.99   19.30
   4  -2   1    2.50   43.00
   4  -2   1   79.09   13.00
  -5   2  -1  159.38   38.30
   5  -2   1   79.59   17.30
   5  -2   1  100.79   41.40
   5  -2   1   52.29   65.29
   5  -2   1  104.49   21.60
  -5  -1   1  302.77   35.70
  -5  -1   1  220.48   48.10
  -5  -1   1  318.37   53.29
  -5  -1   1  286.87   36.70
   4   1  -1   57.19   14.90
   4   1  -1   29.20   48.90
   4   1  -1   64.99   27.30
  -4  -1   1   51.89   15.80
  -4  -1   1   16.90   27.90
  -4  -1   1   73.49   14.40
   3   1  -1  200.68   27.40
   3   1  -1  186.28   38.90
   3   1  -1  130.39   17.00
  -3  -1   1  123.99   17.10
  -3  -1   1  208.48   32.70
  -3  -1   1  150.08   16.50
   2   1  -1 3703.93  248.58
   2   1  -1 3928.11  241.88
  -2  -1   1 3639.44  247.48
  -2  -1   1 3921.91  241.78
  -2  -1   1 3737.23  245.18
  -2  -1   1 4012.60  241.38
   1   1  -1  921.21   58.89
   1   1  -1  866.11   64.89
   1   1  -1  971.30   61.89
  -1  -1   1  908.81   59.49
  -1  -1   1  944.71   59.69
   0   1  -1   -1.00    2.40
   0   1  -1    3.40    3.00
   0   1  -1    1.10    2.30
   0   1  -1   -1.30    1.40
   0   1  -1    3.20    3.20
   0   1  -1   -5.00    2.80
   0  -1   1   -1.10    1.80
   0  -1   1    1.30    2.50
   0  -1   1    0.30    3.30
   0  -1   1   -1.80    2.60
   0  -1   1    1.30    3.00
  -1   1  -1  117.89   11.70
  -1   1  -1  119.49   10.20
   1  -1   1  125.09   13.30
   1  -1   1  110.59   12.20
   1  -1   1  109.39    9.90
  -2   1  -1    1.70    9.00
  -2   1  -1   -3.90    3.30
   2  -1   1    4.90    8.00
   2  -1   1   -0.30    3.00
   2  -1   1   -0.10    3.50
   2  -1   1   27.00   11.00
   2  -1   1    2.50    5.70
  -3   1  -1   17.00    5.90
  -3   1  -1    9.70   15.00
   3  -1   1    2.00    8.20
   3  -1   1   13.50    6.10
   3  -1   1    2.10   18.20
   3  -1   1    9.20    6.10
  -4   1  -1   45.60   22.10
  -4   1  -1    7.00    9.10
   4  -1   1    9.70   11.00
   4  -1   1  -49.90   33.40
   4  -1   1    5.20    7.80
  -5   1  -1  671.03   48.50
  -5   1  -1  662.23   62.09
   5  -1   1  694.83   51.69
   5  -1   1  550.14   70.79
   5  -1   1  628.14   46.50
   5  -1   1  737.43  101.29
  -6   1  -1  726.13   85.89
   6  -1   1  926.31   95.69
   6  -1   1  795.52   68.49
   5   0  -1  109.39   22.80
  -5   0   1  103.09   34.10
  -5   0   1   71.39   21.10
  -5   0   1   58.49   36.50
  -5   0   1   76.19   22.50
   4   0  -1 1134.89  109.59
   4   0  -1 1251.07   82.49
   4   0  -1 1247.68   80.99
   4   0  -1 1227.98   93.79
  -4   0   1 1231.08   89.39
  -4   0   1 1220.88   80.99
  -4   0   1 1232.28   80.99
  -4   0   1 1129.49   86.69
   3   0  -1 2308.87  140.69
   3   0  -1 2263.37  147.19
   3   0  -1 2334.47  141.59
   3   0  -1 2097.29  153.78
  -3   0   1 2238.98  147.09
  -3   0   1 2027.30  142.29
  -3   0   1 2256.77  140.49
  -3   0   1 2052.89  143.49
   2   0  -1  130.09   19.00
   2   0  -1  117.79   11.50
   2   0  -1  117.39   11.40
   2   0  -1  168.28   26.80
  -2   0   1  125.69   20.90
  -2   0   1  127.29   11.80
  -2   0   1  111.59   11.50
   1   0  -1  151.38   14.70
   1   0  -1  148.49   11.40
   1   0  -1  185.78   20.10
   1   0  -1  155.88   11.40
  -1   0   1  115.69   14.10
  -1   0   1  150.68   17.40
  -1   0   1  142.49   11.40
  -1   0   1  159.48   11.50
   0   0  -1   20.80    2.50
   0   0  -1   20.80    2.90
   0   0  -1   16.30    2.80
   0   0  -1   21.50    2.50
   0   0   1   23.40    3.30
   0   0   1   21.50    4.20
   0   0   1   19.10    3.70
   0   0   1   16.20    2.60
   0   0   1   21.00    2.30
  -1   0  -1   40.70    7.00
  -1   0  -1   42.20    4.20
  -1   0  -1   44.10    3.80
  -1   0  -1   47.10    5.20
   1   0   1   44.30    6.10
   1   0   1   43.90    4.50
   1   0   1   50.69    8.50
  -2   0  -1  302.97   20.50
  -2   0  -1  315.47   22.70
  -2   0  -1  281.07   25.00
  -2   0  -1  297.97   19.80
   2   0   1  313.37   21.60
   2   0   1  297.37   19.90
   2   0   1  269.07   26.80
  -3   0  -1  115.29   19.70
  -3   0  -1  116.39   11.50
  -3   0  -1  132.69   10.90
  -3   0  -1  119.89   16.80
   3   0   1   89.39   11.10
   3   0   1   84.89   22.70
   3   0   1  118.69   13.30
  -4   0  -1 1738.63  105.29
  -4   0  -1 1729.73  108.09
  -4   0  -1 1627.44  114.19
  -4   0  -1 1720.43  104.99
   4   0   1 1718.73  107.89
   4   0   1 1396.16  114.69
   4   0   1 1366.46  120.89
  -5   0  -1   57.99   34.80
  -5   0  -1  -20.20   18.00
  -5   0  -1   11.80   13.20
  -5   0  -1   27.00   13.00
   5   0   1   25.70   17.10
   5   0   1   62.69   72.69
   5   0   1   35.60   58.89
   6   0   1  134.69   31.00
   6   0   1   59.69   52.59
   5  -1  -1  135.49   21.80
   5  -1  -1  132.59   26.00
  -5   1   1  126.69   27.10
  -5   1   1  157.88   37.70
   4  -1  -1    6.90   11.40
   4  -1  -1   41.60   31.40
   4  -1  -1   61.89   46.10
   4  -1  -1   18.90   12.40
   4  -1  -1   13.30   15.40
  -4   1   1   21.00   11.40
  -4   1   1    1.80   19.40
  -4   1   1   25.00   12.50
  -4   1   1   42.80   17.20
   3  -1  -1  317.17   45.80
   3  -1  -1  355.56   24.60
   3  -1  -1  302.77   24.60
   3  -1  -1  273.57   36.10
  -3   1   1  299.57   23.40
  -3   1   1  323.17   30.70
  -3   1   1  300.37   24.50
  -3   1   1  262.47   27.80
   2  -1  -1   29.40    6.80
   2  -1  -1   58.69   18.70
   2  -1  -1   44.80    7.90
   2  -1  -1   50.29   13.40
  -2   1   1   51.59    9.80
  -2   1   1   44.80   12.10
  -2   1   1   42.00    7.40
  -2   1   1   56.39    7.70
   1  -1  -1  115.29   10.30
   1  -1  -1  110.79   11.40
   1  -1  -1  108.39   12.20
   1  -1  -1  131.89   10.10
  -1   1   1  124.59   10.00
  -1   1   1  127.99   14.50
  -1   1   1  131.19   10.30
  -1   1   1  133.59    9.70
   0  -1  -1   36.60    6.80
   0  -1  -1   32.70    3.90
   0  -1  -1   24.60    5.10
   0  -1  -1   28.40    5.50
   0  -1  -1   34.90    7.30
   0   1   1   32.80    6.80
   0   1   1   34.70    5.50
   0   1   1   41.00    7.20
   0   1   1   33.80    4.10
   0   1   1   30.60    5.20
  -1  -1  -1   80.19    7.60
  -1  -1  -1   63.89   10.00
  -1  -1  -1   68.49   11.00
   1   1   1   80.19    9.00
   1   1   1   75.69    7.90
   1   1   1   88.69   11.90
  -2  -1  -1    3.20    3.20
  -2  -1  -1    1.40   11.10
  -2  -1  -1    7.30    5.30
   2   1   1   -1.10    3.80
   2   1   1  -10.70   12.40
   2   1   1   -7.90    8.10
  -3  -1  -1  211.88   17.20
  -3  -1  -1  243.48   27.10
   3   1   1  197.18   33.30
   3   1   1  212.08   27.50
   3   1   1  224.48   19.50
  -4  -1  -1  912.31   63.79
  -4  -1  -1  828.92   53.49
  -4  -1  -1  843.92   54.89
   4   1   1  838.42   56.79
   4   1   1  688.13   80.79
   4   1   1  616.64   67.59
   4   1   1  671.93   64.79
  -5  -1  -1  -43.00   16.70
  -5  -1  -1   23.60   32.40
  -5  -1  -1  -26.70   25.70
  -5  -1  -1  -21.40   13.10
   5   1   1    1.40   38.70
   5   1   1   14.60   17.40
  -6  -1  -1   12.50   55.99
  -6  -1  -1   61.09   37.20
   6   1   1    1.90   25.90
   6   1   1  102.69   50.39
   5  -2  -1  168.48   30.40
   5  -2  -1   76.19   21.50
  -5   2   1  154.48   30.20
  -5   2   1  117.29   35.30
   4  -2  -1   51.99   20.00
   4  -2  -1   48.70   14.40
   4  -2  -1    9.10   12.90
   4  -2  -1  -25.40   32.50
  -4   2   1   27.50   15.50
  -4   2   1   31.00   19.60
   3  -2  -1  595.54   43.50
   3  -2  -1  610.84   58.79
   3  -2  -1  592.14   52.49
   3  -2  -1  582.74   42.60
  -3   2   1  643.84   43.40
  -3   2   1  629.34   44.50
   2  -2  -1   39.50    8.10
   2  -2  -1   22.10   22.80
   2  -2  -1   37.80   12.90
   2  -2  -1   61.99   13.40
   2  -2  -1   43.60    8.10
  -2   2   1   38.50    8.30
   1  -2  -1  330.57   22.70
   1  -2  -1  323.77   24.50
   1  -2  -1  322.77   22.90
   1  -2  -1  345.27   23.70
   1  -2  -1  347.37   31.50
  -1   2   1  286.87   22.10
  -1   2   1  276.77   21.40
  -1   2   1  340.87   23.00
   0  -2  -1  101.49   15.00
   0  -2  -1   97.09   10.20
   0  -2  -1  105.89   12.50
   0  -2  -1  111.09   11.40
   0  -2  -1  113.39   12.60
   0   2   1   92.99   12.20
   0   2   1  107.09   10.50
   0   2   1  100.49    8.20
   0   2   1  102.49   15.00
  -1  -2  -1  163.68   20.00
  -1  -2  -1  142.89   14.30
  -1  -2  -1  147.49   14.10
   1   2   1  151.88   13.10
   1   2   1  166.78   14.00
   1   2   1  145.29   16.00
   1   2   1  166.58   15.40
   1   2   1  157.78   19.10
  -2  -2  -1 8862.71  522.95
  -2  -2  -1 8491.85  516.15
   2   2   1 8422.96  518.55
   2   2   1 7355.96  525.25
   2   2   1 8735.43  517.95
   2   2   1 7586.84  524.45
  -3  -2  -1  376.96   30.90
  -3  -2  -1  419.66   43.00
  -3  -2  -1  414.36   28.90
   3   2   1  409.26   31.20
   3   2   1  361.66   45.80
   3   2   1  365.86   39.40
   3   2   1  419.16   36.20
  -4  -2  -1   15.30   13.00
  -4  -2  -1   -1.10   26.60
  -4  -2  -1    5.10   10.30
   4   2   1  109.09   44.70
   4   2   1    2.70   11.70
   4   2   1   29.10   25.30
   4   2   1    9.20   21.10
  -5  -2  -1   36.20   18.70
  -5  -2  -1  -57.79   31.60
  -5  -2  -1  -15.60   15.90
   5   2   1   -0.60   30.90
   5   2   1   17.20   16.80
  -6  -2  -1   10.60   56.49
  -6  -2  -1   11.70   45.30
   6   2   1  -12.60   23.60
   6   2   1  -38.20   46.10
   5  -3  -1  127.99   26.60
   5  -3  -1   99.19   28.80
   4  -3  -1  240.78   24.90
   4  -3  -1  222.88   41.70
   4  -3  -1  175.88   26.30
   4  -3  -1  236.88   42.90
   4  -3  -1  133.79   29.80
  -4   3   1  215.88   30.00
   3  -3  -1    6.50   22.80
   3  -3  -1   61.59   21.00
   3  -3  -1   41.90   13.10
   3  -3  -1   39.80   11.30
   3  -3  -1   68.09   22.90
   3  -3  -1  -25.50   36.20
  -3   3   1   27.10   12.30
   2  -3  -1   74.59   13.00
   2  -3  -1   61.69   28.60
   2  -3  -1   35.60   18.30
   2  -3  -1   28.30   13.30
   2  -3  -1   36.50   15.10
   1  -3  -1  234.18   22.10
   1  -3  -1  259.87   21.50
   1  -3  -1  257.77   21.60
   1  -3  -1  248.28   33.70
   1  -3  -1  239.88   20.10
  -1   3   1  209.08   31.50
   0  -3  -1 6837.32  390.86
   0  -3  -1 6180.88  392.66
   0  -3  -1 5665.93  389.26
   0  -3  -1 6496.55  390.36
   0  -3  -1 6489.25  391.06
   0   3   1 6336.17  395.06
   0   3   1 6437.96  390.16
   0   3   1 5240.28  390.76
   0   3   1 6249.67  388.56
  -1  -3  -1 2984.50  190.98
  -1  -3  -1 3002.30  185.58
  -1  -3  -1 3104.39  187.28
  -1  -3  -1 3121.99  187.18
   1   3   1 2923.11  188.38
   1   3   1 3034.20  186.28
   1   3   1 2904.71  186.78
   1   3   1 2840.22  184.88
   1   3   1 2450.35  188.88
  -2  -3  -1   27.20   10.60
  -2  -3  -1   24.80   17.20
  -2  -3  -1   25.10   10.80
   2   3   1   18.40   14.00
   2   3   1   18.50    7.20
   2   3   1   32.90   21.00
   2   3   1   24.00   10.20
  -3  -3  -1   -2.60   25.30
  -3  -3  -1    7.70   12.40
   3   3   1    1.90   13.20
   3   3   1    8.60   10.30
   3   3   1   40.50   19.50
   3   3   1  -13.70   28.60
  -4  -3  -1   19.50   11.70
  -4  -3  -1   -7.50   33.10
  -4  -3  -1   17.30   18.70
   4   3   1   22.80   13.60
   4   3   1   57.99   22.50
  -5  -3  -1  105.39   21.20
  -5  -3  -1  132.39   44.80
   5   3   1   97.09   34.20
   5   3   1   58.09   19.30
  -6  -3  -1  244.68   60.79
   6   3   1  182.18   54.59
   6   3   1  116.39   29.60
   4  -4  -1   49.70   19.10
   4  -4  -1   44.00   21.50
   4  -4  -1   61.59   41.00
   4  -4  -1   59.39   47.10
   3  -4  -1   -6.30   26.10
   3  -4  -1   30.70   33.40
   3  -4  -1    5.60   14.80
   3  -4  -1   -7.00   12.70
   3  -4  -1  -23.30   21.10
   3  -4  -1  -28.90   23.20
   2  -4  -1 1085.29   67.79
   2  -4  -1  933.01   69.59
   2  -4  -1  987.20   73.79
   2  -4  -1  986.30   68.99
   2  -4  -1 1007.20   72.59
   1  -4  -1  219.98   26.40
   1  -4  -1  251.87   39.20
   1  -4  -1  228.78   24.40
   1  -4  -1  148.39   31.00
   1  -4  -1  266.87   24.20
   1  -4  -1  221.58   27.20
   1  -4  -1  199.18   22.00
  -1   4   1  218.18   38.00
   0  -4  -1  105.89   24.00
   0  -4  -1   60.59   12.70
   0  -4  -1  119.99   20.90
   0  -4  -1  109.19   16.00
   0  -4  -1   93.19   18.80
   0  -4  -1  105.59   18.90
   0  -4  -1   87.79   15.60
   0   4   1   95.19   22.30
   0   4   1   90.49   13.40
   0   4   1   83.59   16.40
   0   4   1   96.29   10.60
  -1  -4  -1  111.09   15.40
  -1  -4  -1  105.89   18.50
  -1  -4  -1   96.19   18.20
  -1  -4  -1  125.89   25.10
   1   4   1  108.39   14.60
   1   4   1  106.89   14.50
   1   4   1  124.39   22.90
   1   4   1  136.39   19.40
   1   4   1  118.49   26.30
  -2  -4  -1   -8.50   14.50
  -2  -4  -1    1.70   26.20
  -2  -4  -1    6.10   14.00
   2   4   1    6.40    9.60
   2   4   1    5.90   10.70
   2   4   1   24.60   26.20
   2   4   1   17.10   14.60
   2   4   1  -29.40   15.00
  -3  -4  -1  -12.90   31.80
  -3  -4  -1    7.40   13.40
  -3  -4  -1   -4.80   15.60
   3   4   1   23.00   37.40
   3   4   1    9.60   22.40
   3   4   1   46.30   14.30
   3   4   1   12.80   13.70
  -4  -4  -1   -0.50   42.10
  -4  -4  -1   20.00   15.60
   4   4   1   -7.30   16.70
   4   4   1   33.20   21.60
  -5  -4  -1   98.19   56.09
  -5  -4  -1  186.78   28.10
   5   4   1  140.39   30.90
   5   4   1  238.28   40.30
   4  -5  -1   11.50   22.20
   4  -5  -1   21.30   27.60
   3  -5  -1   16.50   19.80
   3  -5  -1    4.30   17.70
   3  -5  -1   72.99   48.30
   3  -5  -1  -14.10   27.40
   2  -5  -1   46.90   26.20
   2  -5  -1   52.69   21.80
   2  -5  -1   81.99   18.50
   2  -5  -1   66.89   17.80
   2  -5  -1   85.19   32.00
   1  -5  -1  599.24   46.60
   1  -5  -1  570.24   43.40
   1  -5  -1  579.04   48.30
   1  -5  -1  464.35   47.60
   1  -5  -1  553.44   43.60
   1  -5  -1  585.64   54.49
  -1   5   1  451.85   60.39
   0  -5  -1   52.99   13.60
   0  -5  -1   48.00   14.40
   0  -5  -1   47.20   22.00
   0  -5  -1   65.99   19.50
   0  -5  -1   56.49   15.90
   0  -5  -1   53.59   26.40
   0   5   1   80.59   12.50
   0   5   1   29.90   10.30
   0   5   1   43.40   24.60
   0   5   1   74.19   17.00
  -1  -5  -1  170.28   25.00
  -1  -5  -1  217.28   26.90
  -1  -5  -1  227.88   37.30
   1   5   1  202.28   34.20
   1   5   1  207.68   26.20
   1   5   1  198.48   22.60
   1   5   1  191.48   34.90
  -2  -5  -1   21.50   23.30
  -2  -5  -1   27.80   19.10
  -2  -5  -1   45.50   33.70
   2   5   1   34.40   13.30
   2   5   1   41.50   34.70
   2   5   1   60.09   20.80
   2   5   1   18.40   18.40
  -3  -5  -1  543.75   69.09
  -3  -5  -1  484.15   43.60
   3   5   1  458.15   40.20
   3   5   1  504.55   42.70
   3   5   1  521.65   49.90
   3   5   1  527.55   53.79
   3   5   1  459.35   77.79
  -4  -5  -1  119.19   54.29
  -4  -5  -1  161.48   23.00
   4   5   1  170.38   30.10
   4   5   1  175.98   31.10
  -5  -5  -1   51.59   61.49
   5   5   1   50.39   26.60
   5   5   1   56.19   36.20
   3  -6  -1  498.25   51.69
   3  -6  -1  438.26   45.10
   2  -6  -1   98.29   26.60
   2  -6  -1  150.48   30.40
   2  -6  -1   50.89   49.30
   2  -6  -1  116.79   33.20
   2  -6  -1  139.89   47.30
   1  -6  -1   47.30   20.90
   1  -6  -1   39.70   25.60
   1  -6  -1   98.39   36.00
   1  -6  -1   51.39   20.50
  -1   6   1   11.30   38.60
   0  -6  -1   12.20   29.00
   0  -6  -1  103.39   21.70
   0  -6  -1   43.60   17.10
   0   6   1   59.59   13.30
   0   6   1   52.99   34.10
  -1  -6  -1  309.97   49.30
  -1  -6  -1  274.97   36.10
  -1  -6  -1  314.47   44.10
   1   6   1  287.37   30.40
   1   6   1  247.88   48.60
   1   6   1  308.97   55.89
   1   6   1  257.37   29.20
  -2  -6  -1   41.10   32.70
  -2  -6  -1   50.99   41.90
   2   6   1   82.59   26.30
   2   6   1   57.09   17.70
   2   6   1  123.59   48.10
   2   6   1   80.49   29.80
  -3  -6  -1   78.99   34.40
  -3  -6  -1   98.79   87.49
   3   6   1  104.79   23.90
   3   6   1  120.79   57.89
   3   6   1   82.89   19.20
  -4  -6  -1  591.14   59.59
  -4  -6  -1  868.11   98.79
   4   6   1  743.53   60.99
   4   6   1  744.13   73.89
   4   6   1  706.23   62.99
   2  -7  -1    2.00   26.90
   2  -7  -1  -22.00   33.60
   1  -7  -1   29.20   23.90
   1  -7  -1    4.70   33.80
   1  -7  -1   58.89   30.00
  -1   7   1  -26.30   53.09
   0  -7  -1   43.90   23.80
   0  -7  -1   14.30   28.20
   0  -7  -1   -6.50   34.60
   0   7   1   71.69   43.10
  -1  -7  -1   45.30   43.30
   1   7   1   17.70   41.90
   1   7   1  -19.90   47.60
   1   7   1  -17.90   20.80
   1   7   1    8.50   17.90
  -2  -7  -1  205.08   85.09
   2   7   1  170.88   29.10
   2   7   1   73.79   33.80
   2   7   1  123.89   66.59
   2   7   1  128.99   43.40
  -3  -7  -1  -27.70   56.39
   3   7   1  110.79   43.90
   3   7   1  -27.60   39.70
  -4  -7  -1  122.49   75.99
   4   7   1   88.99   34.20
   4   7   1  237.68   52.69
   0  -8  -1   36.70   27.40
   0  -8  -1   -6.90   50.19
   0   8   1   12.10   59.09
  -1  -8  -1  -13.50   28.60
  -1  -8  -1   79.29   53.69
   1   8   1   84.69   52.09
  -2  -8  -1  335.97   67.69
   2   8   1  204.68   37.10
   2   8   1  143.59   60.59
   1   8  -2   20.40   58.99
  -1  -8   2    8.10   63.19
   0   8  -2   -2.60   49.90
   0  -8   2  -53.39   54.29
   0  -8   2   26.30   45.60
   3   7  -2  170.98   47.70
   3   7  -2   89.79   29.20
  -3  -7   2   20.70   56.29
  -3  -7   2  104.19   67.29
   2   7  -2  207.88   49.60
   2   7  -2  140.89   53.29
   2   7  -2  198.08   33.60
  -2  -7   2  216.38   65.19
  -2  -7   2  289.47   68.49
   1   7  -2   79.49   43.00
  -1  -7   2   61.49   38.20
  -1  -7   2  131.79   52.19
   0   7  -2  -33.40   39.50
   0   7  -2   22.20   29.10
   0  -7   2   28.10   30.70
   0  -7   2    7.80   28.60
   0  -7   2   10.20   43.60
  -1   7  -2  -24.70   45.80
   1  -7   2   16.10   38.20
   1  -7   2   72.29   31.60
   1  -7   2    8.00   25.70
  -2   7  -2  246.08   70.39
   2  -7   2  217.18   34.60
   2  -7   2  294.57   49.99
   2  -7   2  294.37   50.79
   4   6  -2  126.49   31.90
  -4  -6   2  141.99   70.39
   3   6  -2   32.80   24.10
   3   6  -2   19.00   34.00
  -3  -6   2  -34.90   52.09
  -3  -6   2   72.79   42.70
  -3  -6   2    6.10   33.30
   2   6  -2   14.10   15.90
  -2  -6   2   -4.80   34.00
  -2  -6   2  -22.60   42.10
  -2  -6   2  -14.70   29.00
   1   6  -2  114.49   27.00
   1   6  -2  109.99   18.60
   1   6  -2  155.18   35.50
   1   6  -2  162.98   27.10
  -1  -6   2   85.69   27.40
  -1  -6   2   79.49   40.30
  -1  -6   2  139.89   31.70
   0   6  -2  254.27   32.30
   0   6  -2  204.38   42.60
   0  -6   2  188.08   39.60
   0  -6   2  314.47   32.90
   0  -6   2  256.97   39.40
  -1   6  -2   24.40   34.00
   1  -6   2  -18.90   28.50
   1  -6   2   47.70   22.60
   1  -6   2   23.90   16.50
  -2   6  -2  173.58   95.99
   2  -6   2  131.29   26.10
   2  -6   2   81.69   28.90
   2  -6   2  143.09   22.10
   2  -6   2  197.28   31.60
   2  -6   2  117.29   26.00
   3  -6   2  -19.10   31.10
   3  -6   2   15.60   23.70
   3  -6   2   36.20   26.70
   4   5  -2  -11.50   18.00
   4   5  -2   37.90   30.50
  -4  -5   2   -8.40   54.59
   3   5  -2   15.50   19.10
   3   5  -2   27.80   17.80
  -3  -5   2   44.10   43.20
  -3  -5   2   47.90   34.40
   2   5  -2  110.29   26.10
   2   5  -2  124.59   22.90
   2   5  -2  119.29   21.10
   2   5  -2  155.68   29.60
  -2  -5   2  133.79   25.50
  -2  -5   2   93.99   22.40
  -2  -5   2  126.39   32.60
  -2  -5   2  106.49   38.40
   1   5  -2  247.68   30.90
   1   5  -2  242.58   21.30
   1   5  -2  230.18   33.60
   1   5  -2  203.88   26.90
  -1  -5   2  212.98   32.60
  -1  -5   2  258.47   36.90
  -1  -5   2  173.78   37.40
  -1  -5   2  217.68   28.70
   0   5  -2 1434.56  111.29
   0   5  -2 1594.64  104.59
   0  -5   2 1688.63  108.49
   0  -5   2 1538.65  108.09
   0  -5   2 1600.04  111.29
   0  -5   2 1575.54  103.79
  -1   5  -2 1234.68   96.39
   1  -5   2 1168.88   89.59
   1  -5   2 1349.96   94.19
   1  -5   2 1317.27   87.19
   1  -5   2 1300.37   83.69
   1  -5   2 1243.88   95.99
  -2   5  -2   27.30   37.30
   2  -5   2   10.30   35.80
   2  -5   2   33.40   16.90
   2  -5   2    2.50   17.70
   2  -5   2    6.80   27.80
   2  -5   2   15.40   15.90
   2  -5   2  -11.20   13.90
   3  -5   2    4.60   18.30
   3  -5   2   49.30   29.60
   3  -5   2   42.80   18.30
   3  -5   2   97.69   52.89
   4  -5   2    8.10   22.10
   4  -5   2   34.40   41.40
   4  -5   2   36.50   26.40
   5   4  -2   49.10   45.90
   5   4  -2  -14.30   21.90
  -5  -4   2  -25.50   60.39
   4   4  -2   49.20   18.90
  -4  -4   2  -33.90   50.79
   3   4  -2   49.20   52.29
   3   4  -2   14.50   12.20
   3   4  -2    8.30   14.40
  -3  -4   2   33.40   16.30
  -3  -4   2    9.00   37.40
  -3  -4   2   21.70   27.70
   2   4  -2 3179.48  203.88
   2   4  -2 3075.79  199.78
   2   4  -2 3137.09  199.48
   2   4  -2 3161.88  212.18
  -2  -4   2 2925.81  211.28
  -2  -4   2 3245.58  201.18
  -2  -4   2 3218.48  199.58
  -2  -4   2 2951.40  206.38
   1   4  -2 2474.05  154.98
   1   4  -2 2491.15  160.08
   1   4  -2 2449.95  158.18
   1   4  -2 2326.87  156.88
  -1  -4   2 2381.36  160.78
  -1  -4   2 2350.96  164.78
  -1  -4   2 2426.36  156.58
  -1  -4   2 2500.75  157.38
   0   4  -2   12.00   15.80
   0   4  -2   12.90    9.80
   0   4  -2   16.50   12.00
   0   4  -2    8.40    5.00
   0  -4   2    6.80   18.00
   0  -4   2    9.90   14.80
   0  -4   2   -7.80    9.70
   0  -4   2   23.30   13.50
  -1   4  -2   88.69   22.10
  -1   4  -2   96.69   17.50
   1  -4   2   78.49   19.00
   1  -4   2   90.19   17.20
   1  -4   2   72.39   11.40
   1  -4   2  103.69   22.90
   1  -4   2  101.79   24.50
   1  -4   2   60.79   13.10
   1  -4   2   87.79   15.70
  -2   4  -2   91.59   30.80
   2  -4   2  110.99   30.20
   2  -4   2   76.39   14.70
   2  -4   2   81.39   21.00
   2  -4   2   69.59   21.10
   2  -4   2   33.90   28.70
   2  -4   2   77.69   15.10
   3  -4   2  343.97   30.60
   3  -4   2  398.06   44.60
   3  -4   2  339.57   39.60
   3  -4   2  298.17   55.29
   3  -4   2  380.66   34.50
   3  -4   2  293.97   64.19
   4  -4   2   42.40   35.00
   4  -4   2   41.30   56.59
   4  -4   2   55.59   17.90
   4  -4   2   75.69   35.10
   4  -4   2   59.99   36.90
   5  -4   2  288.97   61.29
   5  -4   2  216.38   34.20
   5   3  -2   83.09   24.60
  -5  -3   2  -35.20   55.69
   4   3  -2  302.67   31.20
  -4  -3   2  346.37   60.89
  -4  -3   2  217.58   33.20
   3   3  -2 1833.62  116.09
   3   3  -2 1862.51  113.79
   3   3  -2 1654.43  139.59
  -3  -3   2 1679.13  123.99
  -3  -3   2 1811.92  116.79
  -3  -3   2 1669.33  114.79
  -3  -3   2 1667.13  130.29
   2   3  -2   42.80   11.10
   2   3  -2   79.49   13.00
   2   3  -2   50.69   17.40
   2   3  -2   87.89   31.10
  -2  -3   2   28.20   17.60
  -2  -3   2   67.69   27.30
  -2  -3   2   27.90   10.90
  -2  -3   2   43.30   11.50
   1   3  -2   -3.10    8.10
   1   3  -2    2.90    5.10
   1   3  -2   -8.70    9.50
   1   3  -2    3.50   10.50
  -1  -3   2  -11.60   11.50
  -1  -3   2    9.20   18.20
  -1  -3   2   18.60    9.40
  -1  -3   2   -6.70    7.50
   0   3  -2  127.49   15.00
   0   3  -2  132.99   14.00
   0   3  -2  123.29   10.60
   0   3  -2  108.39   17.60
   0   3  -2  133.69   15.20
   0  -3   2  119.79   23.20
   0  -3   2  131.49   16.70
   0  -3   2  136.79   12.90
   0  -3   2  133.29   16.50
  -1   3  -2  215.08   25.70
  -1   3  -2  196.98   18.70
   1  -3   2  209.28   21.20
   1  -3   2  199.08   16.30
   1  -3   2  220.28   28.00
   1  -3   2  217.18   25.20
   1  -3   2  178.48   14.70
   1  -3   2  232.78   19.60
   1  -3   2  227.88   18.90
   2  -3   2  126.89   15.10
   2  -3   2  133.19   20.80
   2  -3   2  140.69   24.10
   2  -3   2  177.68   33.00
   2  -3   2  164.98   17.90
   2  -3   2  124.29   27.30
  -3   3  -2   11.50   18.20
   3  -3   2    6.00    8.90
   3  -3   2  -21.20   21.60
   3  -3   2  -14.30   29.60
   3  -3   2   -9.50   17.30
   3  -3   2    9.30   31.30
  -4   3  -2   30.70   25.30
   4  -3   2   -0.60   23.70
   4  -3   2  -37.70   50.49
   4  -3   2    2.30   11.70
   4  -3   2   -4.50   11.20
   4  -3   2  -17.80   29.90
   4  -3   2  -15.60   46.80
  -5   3  -2   30.50   37.50
   5  -3   2    7.40   18.70
   5  -3   2   26.00   44.80
   5  -3   2    7.00   16.10
   5   2  -2  116.89   25.40
  -5  -2   2  165.28   87.39
   4   2  -2  313.27   32.80
  -4  -2   2  336.47   52.79
  -4  -2   2  391.56   37.10
  -4  -2   2  291.57   33.10
   3   2  -2  347.37   56.19
   3   2  -2  306.87   23.90
   3   2  -2  290.87   26.80
   3   2  -2  284.17   39.10
  -3  -2   2  260.47   38.00
  -3  -2   2  319.37   27.50
  -3  -2   2  281.37   45.40
  -3  -2   2  296.77   26.50
   2   2  -2  149.88   22.60
   2   2  -2  139.79   14.00
   2   2  -2  140.29   15.10
   2   2  -2  154.58   31.90
  -2  -2   2  186.28   31.00
  -2  -2   2  136.09   14.90
  -2  -2   2  139.69   16.20
  -2  -2   2  136.49   24.40
   1   2  -2  524.35   35.60
   1   2  -2  549.74   39.20
   1   2  -2  524.85   35.80
  -1  -2   2  521.35   35.60
  -1  -2   2  516.45   35.90
  -1  -2   2  501.75   39.50
  -1  -2   2  533.25   36.20
  -1  -2   2  480.65   43.70
   0   2  -2   19.90    7.30
   0   2  -2   21.30    6.70
   0   2  -2   20.20    3.90
   0   2  -2   32.10    8.60
   0   2  -2   21.80    6.80
   0   2  -2   28.50    5.80
   0  -2   2   20.60    7.70
   0  -2   2   17.70    6.60
   0  -2   2   21.00    4.80
   0  -2   2   19.90    7.70
  -1   2  -2   -3.10    9.90
  -1   2  -2   -3.60    7.30
  -1   2  -2    7.50    6.30
   1  -2   2   -2.60    5.80
   1  -2   2    3.40    7.20
   1  -2   2    0.50    7.00
   1  -2   2    0.00    9.70
   1  -2   2   -6.20   10.20
  -2   2  -2  542.35   38.60
  -2   2  -2  557.14   41.30
   2  -2   2  564.34   44.40
   2  -2   2  553.04   38.90
   2  -2   2  522.25   45.20
   2  -2   2  516.55   42.40
  -3   2  -2  199.48   26.10
   3  -2   2  161.68   32.10
   3  -2   2  187.38   24.30
   3  -2   2  119.09   22.60
   3  -2   2  169.28   30.60
   3  -2   2  188.28   37.00
   3  -2   2  157.48   14.60
   3  -2   2  190.98   15.40
  -4   2  -2 1505.85   99.39
   4  -2   2 1423.56   91.79
   4  -2   2 1292.07   89.09
   4  -2   2 1440.56   90.79
   4  -2   2 1356.36  110.39
   4  -2   2 1388.96  103.59
   4  -2   2 1269.47  100.29
  -5   2  -2  231.58   47.50
   5  -2   2  159.08   46.50
   5  -2   2   64.79   59.09
   5  -2   2  188.88   27.20
   5  -2   2  154.38   20.40
   5   1  -2 1199.98   87.79
  -5  -1   2 1315.17  107.69
  -5  -1   2 1237.48   89.09
  -5  -1   2 1135.19   95.59
   4   1  -2   93.99   35.40
   4   1  -2   13.10   76.59
   4   1  -2  117.19   21.20
  -4  -1   2   72.19   18.10
  -4  -1   2  114.69   20.60
  -4  -1   2  152.88   37.90
   3   1  -2  514.85   38.00
   3   1  -2  522.55   37.30
   3   1  -2  518.45   35.20
   3   1  -2  522.75   65.09
   3   1  -2  508.25   48.00
  -3  -1   2  469.35   46.20
  -3  -1   2  501.35   37.50
  -3  -1   2  512.85   38.50
  -3  -1   2  477.45   52.59
   2   1  -2    8.60   12.70
   2   1  -2    3.70   20.90
   2   1  -2   -0.60    5.60
   2   1  -2   -2.20    5.30
  -2  -1   2   -4.10   16.60
  -2  -1   2    2.00   12.10
  -2  -1   2    1.80    6.00
  -2  -1   2   -2.40    7.30
   1   1  -2    4.20    3.50
   1   1  -2    4.00    4.20
   1   1  -2   12.80    8.00
   1   1  -2    6.40    4.30
  -1  -1   2    9.10   13.30
  -1  -1   2   15.80    8.60
  -1  -1   2   10.30    4.70
  -1  -1   2    6.40    4.80
   0   1  -2  236.58   17.10
   0   1  -2  255.17   19.30
   0   1  -2  257.27   18.80
   0   1  -2  244.88   17.80
   0   1  -2  239.18   18.70
   0  -1   2  257.37   19.50
   0  -1   2  240.08   19.80
   0  -1   2  257.07   17.40
   0  -1   2  248.08   19.90
   0  -1   2  232.68   19.00
   0  -1   2  247.58   17.40
  -1   1  -2   26.40    5.40
  -1   1  -2   16.10    7.60
  -1   1  -2   28.30    7.90
  -1   1  -2   24.50    7.40
   1  -1   2   21.00    3.70
   1  -1   2   25.20    9.40
   1  -1   2   29.30    8.00
   1  -1   2   22.60    4.20
   1  -1   2   22.10    5.30
   1  -1   2   18.70    7.50
  -2   1  -2 6003.40  368.56
   2  -1   2 5716.23  368.16
   2  -1   2 6066.39  364.76
   2  -1   2 6109.39  364.96
   2  -1   2 5458.95  368.86
   2  -1   2 5713.53  364.06
   2  -1   2 5665.23  368.46
  -3   1  -2  630.14   49.00
   3  -1   2  638.14   41.80
   3  -1   2  597.14   51.19
   3  -1   2  549.95   48.80
   3  -1   2  647.74   42.10
  -4   1  -2   95.49   26.10
   4  -1   2   92.29   14.60
   4  -1   2   76.89   27.90
   4  -1   2   49.50   30.00
  -5   1  -2  142.79   37.10
   5  -1   2  188.18   59.29
   5  -1   2  128.69   40.40
   5  -1   2  117.19   21.30
  -6   1  -2  203.68   58.29
   6  -1   2  108.09   57.19
   6  -1   2  145.39   42.80
   5   0  -2   17.60   17.10
   5   0  -2    9.30   22.00
  -5   0   2   -5.00   35.10
  -5   0   2  -14.00   23.20
  -5   0   2   14.20   42.50
   4   0  -2   13.10   11.90
   4   0  -2   17.40   32.00
   4   0  -2    2.30   11.60
   4   0  -2   32.50   54.99
  -4   0   2  -37.70   29.00
  -4   0   2   -0.50   14.00
  -4   0   2   41.00   15.40
  -4   0   2  -15.90   20.00
   3   0  -2   59.79   12.10
   3   0  -2   24.40   20.30
   3   0  -2   26.20    9.90
   3   0  -2   46.80   32.10
  -3   0   2   38.50   10.80
  -3   0   2   35.40   11.20
  -3   0   2   28.20   20.90
   2   0  -2  287.17   21.20
   2   0  -2  284.07   38.10
   2   0  -2  275.67   21.00
   2   0  -2  265.57   27.50
  -2   0   2  238.98   31.50
  -2   0   2  240.78   25.60
  -2   0   2  269.07   21.60
  -2   0   2  273.37   21.60
   1   0  -2   98.69    9.80
   1   0  -2   88.59   16.90
   1   0  -2   94.89   12.30
   1   0  -2   97.59    9.50
  -1   0   2  131.99   19.80
  -1   0   2   86.89    9.70
  -1   0   2   83.99   12.40
  -1   0   2   92.09    9.40
   0   0  -2  458.75   31.90
   0   0  -2  498.15   33.90
   0   0  -2  520.65   34.40
   0   0  -2  499.55   32.40
   0   0  -2  512.85   32.60
   0   0  -2  484.15   32.20
   0   0   2  474.95   34.50
   0   0   2  487.35   31.90
   0   0   2  494.45   32.60
   0   0   2  467.65   32.50
   0   0   2  485.95   32.30
   0   0   2  486.05   34.10
  -1   0  -2  900.61   53.09
  -1   0  -2  745.53   55.09
  -1   0  -2  849.32   54.79
  -1   0  -2  819.92   52.89
   1   0   2  803.72   53.29
   1   0   2  932.91   53.79
   1   0   2  690.63   54.99
   1   0   2  840.32   54.89
  -2   0  -2  251.87   17.60
  -2   0  -2  246.88   22.80
  -2   0  -2  266.87   17.90
  -2   0  -2  267.27   18.80
   2   0   2  215.68   21.60
   2   0   2  257.37   23.80
   2   0   2  258.17   22.70
  -3   0  -2   44.70   15.70
  -3   0  -2   65.09   12.00
  -3   0  -2   61.49    8.50
   3   0   2   61.99   10.80
   3   0   2   67.39   19.70
  -4   0  -2  536.95   52.69
  -4   0  -2  598.94   40.10
  -4   0  -2  609.84   42.40
   4   0   2  652.83   44.10
   4   0   2  549.85   54.29
   4   0   2  480.15   58.79
  -5   0  -2    5.20   14.50
  -5   0  -2   45.80   34.90
   5   0   2   52.39   62.69
   5   0   2   60.89   64.59
   5   0   2    9.20   17.00
  -6   0  -2   83.19   56.49
   6   0   2    5.50   49.20
   6   0   2   93.49   28.20
   5  -1  -2  250.77   35.40
  -5   1   2  274.57   40.00
  -5   1   2  307.37   42.40
   4  -1  -2   57.39   34.80
   4  -1  -2   90.19   18.10
   4  -1  -2   72.29   15.70
  -4   1   2   99.29   21.10
  -4   1   2   37.50   24.60
  -4   1   2   89.39   17.90
   3  -1  -2  332.17   39.80
   3  -1  -2  361.46   28.10
   3  -1  -2  353.56   28.60
  -3   1   2  324.87   28.20
  -3   1   2  325.47   32.70
  -3   1   2  378.96   38.20
  -3   1   2  344.47   27.80
   2  -1  -2  225.68   23.70
   2  -1  -2  222.98   18.20
   2  -1  -2  203.88   17.70
  -2   1   2  210.38   18.00
  -2   1   2  210.88   18.00
  -2   1   2  192.78   26.20
   1  -1  -2  153.78   13.20
   1  -1  -2  139.29   12.30
   1  -1  -2  136.19   12.70
   1  -1  -2  133.39   17.20
  -1   1   2  126.49   12.40
  -1   1   2  111.59   21.40
  -1   1   2  149.59   13.70
  -1   1   2  144.39   12.20
   0  -1  -2  713.13   47.10
   0  -1  -2  727.33   49.10
   0  -1  -2  753.92   49.90
   0  -1  -2  753.12   49.10
   0  -1  -2  737.63   47.90
   0   1   2  696.33   47.10
   0   1   2  768.42   46.80
   0   1   2  715.23   50.09
   0   1   2  677.03   47.80
   0   1   2  751.42   49.40
  -1  -1  -2  335.17   24.30
  -1  -1  -2  307.67   24.90
  -1  -1  -2  331.97   23.20
  -1  -1  -2  306.47   21.10
   1   1   2  332.77   24.10
   1   1   2  279.47   23.80
   1   1   2  324.17   21.90
  -2  -1  -2  266.37   22.60
  -2  -1  -2  276.27   26.00
  -2  -1  -2  276.67   20.10
   2   1   2  239.88   22.70
   2   1   2  269.47   20.70
   2   1   2  242.88   26.50
  -3  -1  -2    5.00    8.40
  -3  -1  -2    9.00    4.60
  -3  -1  -2    2.20   12.00
   3   1   2    7.70    6.60
   3   1   2   36.40   22.00
   3   1   2   -9.00   12.10
  -4  -1  -2   36.00   23.50
  -4  -1  -2   -3.20    7.70
  -4  -1  -2   16.40   16.70
  -4  -1  -2   -7.70    9.70
   4   1   2  -54.09   30.60
   4   1   2  -13.60   24.00
   4   1   2  -27.50   21.40
   4   1   2   -6.40    9.70
  -5  -1  -2   31.00   15.90
  -5  -1  -2   -9.20   34.50
  -5  -1  -2    2.90   22.60
   5   1   2   32.50   32.10
   5   1   2   16.10   16.70
  -6  -1  -2  114.99   35.30
  -6  -1  -2   95.99   56.49
   6   1   2  152.18   52.89
   6   1   2   68.69   26.20
   5  -2  -2   89.19   41.50
   5  -2  -2   89.89   25.30
   4  -2  -2  399.06   52.79
   4  -2  -2  263.97   30.00
   4  -2  -2  290.67   51.19
   4  -2  -2  310.77   31.90
  -4   2   2  319.07   33.30
   3  -2  -2   64.59   13.30
   3  -2  -2   75.79   27.50
   3  -2  -2   48.80   22.30
   3  -2  -2   78.89   14.20
  -3   2   2   80.49   14.40
  -3   2   2   74.89   11.70
   2  -2  -2  922.71   58.59
   2  -2  -2  854.61   60.09
   2  -2  -2  864.81   58.79
   2  -2  -2  793.02   68.49
  -2   2   2  894.91   57.59
  -2   2   2  876.71   58.59
   1  -2  -2 4945.51  311.97
   1  -2  -2 4951.30  310.07
   1  -2  -2 5238.58  310.17
  -1   2   2 4671.03  313.77
  -1   2   2 4822.72  309.67
   0  -2  -2  135.69   16.40
   0  -2  -2  145.39   14.40
   0  -2  -2  137.99   12.10
   0  -2  -2  130.99   18.80
   0  -2  -2  155.78   15.40
   0   2   2  126.59   14.40
   0   2   2  135.09   17.90
   0   2   2  128.39   12.00
  -1  -2  -2  228.28   19.40
  -1  -2  -2  245.68   19.20
  -1  -2  -2  211.28   16.80
  -1  -2  -2  209.28   21.00
   1   2   2  224.18   22.00
   1   2   2  230.68   18.60
   1   2   2  173.98   22.70
  -2  -2  -2   41.90   13.70
  -2  -2  -2   62.19   15.90
  -2  -2  -2   37.00    9.90
   2   2   2   27.40   10.00
   2   2   2   16.50   14.30
   2   2   2   38.50    9.00
  -3  -2  -2   23.60   10.70
  -3  -2  -2    9.00   16.40
   3   2   2   14.60    9.70
   3   2   2   28.20   13.60
   3   2   2    9.30   16.00
   3   2   2   20.50   24.80
  -4  -2  -2   27.50    9.60
  -4  -2  -2   15.20   22.10
  -4  -2  -2   26.30   14.10
   4   2   2   24.20   34.60
   4   2   2   23.40   11.10
   4   2   2   15.80   24.60
   4   2   2   17.60   21.10
  -5  -2  -2  220.58   26.60
  -5  -2  -2  250.17   39.60
  -5  -2  -2  279.87   56.69
  -5  -2  -2  246.38   33.30
   5   2   2  300.77   32.70
   5   2   2  268.97   50.19
  -6  -2  -2 1014.60   88.69
  -6  -2  -2 1011.90  103.99
   6   2   2  929.51   92.19
   6   2   2  874.01   75.49
   5  -3  -2   67.59   28.00
   5  -3  -2   37.10   36.60
   4  -3  -2  232.28   33.40
   4  -3  -2  251.67   40.50
   4  -3  -2  347.67   44.60
   4  -3  -2  371.96   70.49
   4  -3  -2  306.07   31.60
   3  -3  -2 1137.59   89.19
   3  -3  -2 1176.78   82.29
   3  -3  -2 1294.97   81.79
   3  -3  -2 1238.38   85.09
  -3   3   2 1191.08   82.19
   2  -3  -2    1.90   29.10
   2  -3  -2   18.00   17.00
   2  -3  -2   -8.80   15.20
   2  -3  -2    4.80    8.90
   2  -3  -2    6.30    9.40
  -2   3   2  -17.10    9.00
   1  -3  -2    9.90   12.10
   1  -3  -2   16.60    7.30
   1  -3  -2   24.50   20.60
   1  -3  -2   29.20   31.70
   1  -3  -2   12.60    8.90
  -1   3   2    9.60    9.10
  -1   3   2   17.60   11.00
  -1   3   2   17.70    7.40
   0  -3  -2   13.20   17.30
   0  -3  -2   11.90    7.00
   0  -3  -2   12.10   12.60
   0  -3  -2    0.70   10.00
   0  -3  -2    2.40    9.30
   0   3   2   -1.70    8.20
   0   3   2  -23.80   12.80
   0   3   2  -13.30   10.40
  -1  -3  -2  105.19   15.30
  -1  -3  -2  146.59   20.30
  -1  -3  -2  107.89   15.70
   1   3   2  123.29   19.20
   1   3   2  119.89   15.20
   1   3   2   95.39   15.60
   1   3   2  112.69   18.10
   1   3   2  103.29   15.20
  -2  -3  -2   55.19   16.70
  -2  -3  -2   63.29   18.30
  -2  -3  -2   38.30   10.70
   2   3   2   63.29   13.40
   2   3   2   45.80   14.80
   2   3   2   42.10   11.80
   2   3   2   52.99   11.30
   2   3   2   51.49   21.00
  -3  -3  -2  152.88   21.60
  -3  -3  -2  202.18   32.10
   3   3   2  161.28   20.40
   3   3   2  141.59   21.90
   3   3   2  158.48   35.40
   3   3   2  159.28   26.80
  -4  -3  -2  184.58   37.10
  -4  -3  -2  156.78   19.40
  -4  -3  -2  130.59   23.10
   4   3   2  101.59   32.80
   4   3   2   66.69   62.19
   4   3   2  176.78   30.30
   4   3   2  125.29   25.10
  -5  -3  -2  483.75   62.79
  -5  -3  -2  436.86   36.90
   5   3   2  332.77   42.90
   5   3   2  414.06   51.69
  -6  -3  -2  177.48   55.99
  -6  -3  -2   70.29   70.99
   6   3   2   89.59   35.10
   6   3   2    2.50   43.30
   4  -4  -2   43.00   22.20
   4  -4  -2  122.49   55.79
   3  -4  -2    4.40   15.30
   3  -4  -2   44.80   17.20
   3  -4  -2  -10.90   28.70
   2  -4  -2   15.70   14.10
   2  -4  -2   41.10   14.30
   2  -4  -2   26.90   21.10
   2  -4  -2   22.40   19.30
   1  -4  -2  664.03   48.10
   1  -4  -2  672.53   49.80
   1  -4  -2  650.13   61.49
   1  -4  -2  654.73   48.70
   1  -4  -2  636.14   56.89
   0  -4  -2   10.50   14.50
   0  -4  -2    3.90   15.30
   0  -4  -2   15.60   20.00
   0  -4  -2   -3.20    9.20
   0  -4  -2   18.20   12.70
   0   4   2   19.50   14.80
   0   4   2    1.10    9.60
   0   4   2  -11.30   19.30
  -1  -4  -2   87.79   16.90
  -1  -4  -2   53.49   19.00
  -1  -4  -2   53.49   13.90
   1   4   2   54.19   12.70
   1   4   2   39.00   14.20
   1   4   2   69.79   20.30
   1   4   2   77.09   14.30
   1   4   2    6.80   21.00
  -2  -4  -2  198.98   32.40
  -2  -4  -2  146.89   22.40
  -2  -4  -2  148.39   21.80
   2   4   2  119.99   26.20
   2   4   2  161.28   18.50
   2   4   2  166.18   24.10
   2   4   2  141.39   19.80
   2   4   2  136.19   25.20
  -3  -4  -2   34.00   29.70
  -3  -4  -2    9.60   27.60
  -3  -4  -2   20.90   17.50
   3   4   2   22.90   13.80
   3   4   2   27.60   15.30
   3   4   2   14.80   34.30
   3   4   2   21.70   23.30
  -4  -4  -2 1336.37  104.59
   4   4   2 1270.07   89.39
   4   4   2 1219.98   90.19
  -5  -4  -2   62.29   47.60
  -5  -4  -2   88.99   20.50
   5   4   2   57.39   24.20
   5   4   2  138.39   35.10
   4  -5  -2  213.68   38.50
   4  -5  -2  116.49   31.70
   3  -5  -2  252.27   60.89
   3  -5  -2  268.47   44.30
   3  -5  -2  310.57   36.50
   2  -5  -2  196.48   42.20
   2  -5  -2  229.68   31.70
   2  -5  -2  211.28   45.80
   2  -5  -2  209.58   29.00
   2  -5  -2  203.58   29.40
   1  -5  -2   55.89   28.60
   1  -5  -2   38.10   20.70
   1  -5  -2   86.89   18.00
   1  -5  -2   97.19   21.60
   1  -5  -2  -14.70   35.80
  -1   5   2   41.60   35.20
   0  -5  -2  341.97   32.50
   0  -5  -2  304.07   31.70
   0  -5  -2  298.27   29.70
   0  -5  -2  329.27   45.60
   0  -5  -2  324.87   37.40
   0   5   2  300.37   27.90
   0   5   2  270.47   43.70
   0   5   2  247.78   33.90
  -1  -5  -2   80.49   26.00
  -1  -5  -2   99.79   19.90
  -1  -5  -2   86.59   17.50
  -1  -5  -2   48.10   23.20
  -1  -5  -2   92.49   19.30
   1   5   2   68.59   26.60
   1   5   2  103.29   27.20
   1   5   2   78.69   16.10
   1   5   2  130.79   20.90
  -2  -5  -2 1938.01  125.39
  -2  -5  -2 1854.21  125.69
  -2  -5  -2 2110.39  136.49
   2   5   2 1774.22  123.89
   2   5   2 1907.31  129.09
   2   5   2 1878.01  122.09
   2   5   2 1917.51  125.99
   2   5   2 1631.64  131.89
  -3  -5  -2 1592.64  105.29
  -3  -5  -2 1761.52  120.79
   3   5   2 1509.55  108.59
   3   5   2 1518.85  104.59
   3   5   2 1513.95  102.19
   3   5   2 1481.05  109.89
   3   5   2 1318.87  119.99
  -4  -5  -2   46.50   44.00
  -4  -5  -2   85.29   23.90
   4   5   2  100.39   34.90
   4   5   2   58.19   22.90
   4   5   2   27.70   25.30
  -5  -5  -2  -37.00   53.59
   5   5   2   13.80   35.20
   5   5   2   71.99   30.10
   3  -6  -2   83.49   31.80
   3  -6  -2   78.29   32.30
   2  -6  -2  154.08   48.30
   2  -6  -2  111.39   28.40
   2  -6  -2  212.58   39.10
   2  -6  -2  280.87   57.49
   2  -6  -2  109.09   30.00
   1  -6  -2   80.99   21.20
   1  -6  -2   25.70   28.20
   1  -6  -2   13.40   24.20
   1  -6  -2   47.00   33.00
   1  -6  -2   36.90   35.50
  -1   6   2   14.90   44.80
   0  -6  -2  944.21   79.39
   0  -6  -2 1000.50   70.89
   0  -6  -2 1014.80   74.09
   0  -6  -2 1072.19   73.59
   0   6   2  912.11   86.79
  -1  -6  -2  947.91   74.79
  -1  -6  -2  940.81   74.39
  -1  -6  -2  975.00   67.89
  -1  -6  -2 1100.19   71.99
  -1  -6  -2 1074.89   83.19
   1   6   2  990.90   69.69
   1   6   2  800.22   83.29
   1   6   2  940.01   82.59
  -2  -6  -2  119.99   37.80
  -2  -6  -2   90.89   35.00
   2   6   2   36.20   19.30
   2   6   2   47.00   25.80
   2   6   2   55.19   31.90
   2   6   2  -10.30   43.60
   2   6   2   91.89   23.00
  -3  -6  -2   42.80   35.10
   3   6   2   15.30   19.80
   3   6   2   86.99   30.30
   3   6   2   16.90   36.00
   3   6   2    9.40   19.70
  -4  -6  -2  105.79   54.29
  -4  -6  -2   53.09   35.70
   4   6   2   24.80   33.90
   4   6   2   46.20   29.20
   4   6   2   26.00   25.20
   2  -7  -2   28.60   30.80
   2  -7  -2   49.50   36.70
   1  -7  -2   17.60   28.50
   1  -7  -2   71.89   55.69
   1  -7  -2  131.29   35.60
   1  -7  -2   37.90   38.00
  -1   7   2  -55.99   54.29
   0  -7  -2   -4.10   34.50
   0  -7  -2    2.60   21.20
   0   7   2    0.50   44.10
  -1  -7  -2  310.87   58.59
  -1  -7  -2  208.18   33.20
   1   7   2  130.29   45.70
   1   7   2  180.78   54.79
   1   7   2  103.49   24.10
   1   7   2  179.28   29.30
  -2  -7  -2  158.98   54.39
   2   7   2  136.79   30.40
   2   7   2   58.59   64.89
   2   7   2  111.99   46.80
   2   7   2  138.79   33.10
  -3  -7  -2  238.58   60.39
   3   7   2   84.69   32.10
   3   7   2   85.49   44.20
  -4  -7  -2  113.29   64.39
   4   7   2  -37.40   30.90
   4   7   2   59.59   44.80
   0  -8  -2   -4.80   29.40
   0   8   2  -48.10   57.09
  -1  -8  -2   72.69   31.90
  -1  -8  -2   91.39   52.29
   1   8   2  110.39   53.69
  -2  -8  -2  -13.20   30.90
  -2  -8  -2  -48.30   55.29
   2   8   2  -60.09   55.89
   2   8   2  -26.80   31.10
   2   7  -3  166.88   27.30
   2   7  -3  113.49   44.80
  -2  -7   3  180.88   57.89
  -2  -7   3  123.89   64.69
   1   7  -3  201.68   51.29
  -1  -7   3  184.58   60.59
  -1  -7   3  204.58   44.90
   0   7  -3   35.20   49.50
   0  -7   3   45.80   49.40
   0  -7   3   34.30   35.80
   0  -7   3   38.80   30.40
  -1   7  -3   67.09   52.59
   1  -7   3    6.30   33.10
   1  -7   3   11.90   43.90
  -2   7  -3  348.57   76.39
   2  -7   3  324.87   43.00
   2  -7   3  337.57   51.89
   3   6  -3  270.17   39.00
   3   6  -3  252.77   31.70
   3   6  -3  241.28   49.50
  -3  -6   3  280.97   66.09
  -3  -6   3  215.28   52.49
   2   6  -3   17.90   17.20
   2   6  -3   49.80   30.40
   2   6  -3   98.39   46.00
   2   6  -3  -17.80   23.00
  -2  -6   3   17.80   39.70
  -2  -6   3   -5.70   43.40
   1   6  -3  250.17   24.70
   1   6  -3  219.98   45.70
   1   6  -3  257.97   34.80
  -1  -6   3  205.88   47.60
  -1  -6   3  269.97   39.80
  -1  -6   3  197.88   40.40
   0   6  -3   70.79   24.20
   0   6  -3   91.99   36.70
   0  -6   3   29.70   34.40
   0  -6   3   92.39   29.10
   0  -6   3   39.40   23.60
  -1   6  -3  -51.59   34.70
   1  -6   3    8.80   21.90
   1  -6   3   -8.40   29.10
   1  -6   3    4.70   18.20
  -2   6  -3   57.99   57.89
   2  -6   3  -15.70   18.30
   2  -6   3    4.90   26.90
   2  -6   3  -20.90   15.30
   2  -6   3  -27.20   23.40
   2  -6   3   18.70   23.10
   3  -6   3  -19.00   33.60
   3  -6   3  -18.20   28.40
   3  -6   3   -2.90   23.10
   4   5  -3  148.99   27.50
  -4  -5   3  204.08   68.59
  -4  -5   3  165.58   52.69
   3   5  -3  971.70   81.79
   3   5  -3  920.41   66.99
   3   5  -3  884.61   67.59
  -3  -5   3  897.41  100.19
  -3  -5   3  859.41   89.19
   2   5  -3  -56.19   55.49
   2   5  -3   24.60   24.80
   2   5  -3   -0.90   19.50
   2   5  -3   36.80   14.70
   2   5  -3  -30.70   35.90
   2   5  -3    2.90   17.40
  -2  -5   3   10.30   29.40
  -2  -5   3    5.80   37.30
  -2  -5   3   -7.30   20.90
   1   5  -3   13.80   15.40
   1   5  -3    6.50   10.30
   1   5  -3   38.90   22.00
   1   5  -3  -36.60   20.80
   1   5  -3   24.60   20.60
  -1  -5   3   -3.00   18.00
  -1  -5   3   -8.20   30.40
  -1  -5   3  -14.30   22.00
  -1  -5   3    2.70   21.60
   0   5  -3  252.67   27.80
   0   5  -3  266.07   38.70
   0   5  -3  212.58   29.80
   0  -5   3  256.47   34.20
   0  -5   3  298.87   43.40
   0  -5   3  182.38   34.00
   0  -5   3  243.48   26.10
  -1   5  -3  116.19   23.40
  -1   5  -3  106.19   32.00
   1  -5   3   25.10   26.50
   1  -5   3  145.59   26.70
   1  -5   3   86.59   30.90
   1  -5   3  157.08   26.40
   1  -5   3  122.29   36.80
  -2   5  -3  104.19   40.70
   2  -5   3   74.09   21.90
   2  -5   3  115.49   23.40
   2  -5   3   86.99   20.70
   2  -5   3  156.18   43.90
   2  -5   3   88.49   12.90
   2  -5   3  167.68   55.89
   2  -5   3   95.69   39.00
   3  -5   3  255.77   42.20
   3  -5   3  222.28   28.70
   4  -5   3  569.94   53.19
   4  -5   3  449.56   65.49
   4  -5   3  502.95   46.80
   4   4  -3   22.40   18.70
   4   4  -3   38.60   21.00
  -4  -4   3  -11.60   41.00
  -4  -4   3 -115.89   51.19
   3   4  -3   45.20   18.40
   3   4  -3   33.20   15.80
  -3  -4   3   59.19   34.80
  -3  -4   3  -51.69   35.70
   2   4  -3  379.66   57.09
   2   4  -3  522.85   40.80
   2   4  -3  534.35   48.50
   2   4  -3  520.35   39.00
   2   4  -3  493.85   46.80
  -2  -4   3  470.55   50.19
  -2  -4   3  453.75   61.49
  -2  -4   3  506.15   42.30
   1   4  -3   23.00    7.80
   1   4  -3   25.60   16.50
   1   4  -3   21.20   14.90
   1   4  -3   -4.20   20.50
   1   4  -3   28.70    9.80
   1   4  -3   37.20   17.20
  -1  -4   3   44.90   14.70
  -1  -4   3    7.60   17.10
  -1  -4   3   43.50   28.30
  -1  -4   3   44.30   13.40
   0   4  -3   20.40   12.60
   0   4  -3    8.00    5.50
   0   4  -3   16.00   13.30
   0   4  -3   22.50   16.70
   0   4  -3   19.00    8.50
   0  -4   3   21.30   10.60
   0  -4   3    1.40   14.00
   0  -4   3    2.60   21.10
   0  -4   3   14.00   15.00
  -1   4  -3   17.60   11.10
  -1   4  -3   28.20   19.20
   1  -4   3    5.30   20.20
   1  -4   3   30.70   17.50
   1  -4   3   41.00   22.10
   1  -4   3   20.00    8.90
   1  -4   3    3.90   12.10
  -2   4  -3  572.74   45.40
  -2   4  -3  609.04   57.79
   2  -4   3  557.04   56.49
   2  -4   3  584.54   44.00
   2  -4   3  520.05   46.00
   2  -4   3  641.44   48.50
   2  -4   3  493.65   56.59
   3  -4   3  131.39   28.40
   3  -4   3   63.99   26.40
   3  -4   3   55.69   41.90
   3  -4   3  110.49   19.60
   3  -4   3   72.49   45.50
   3  -4   3  104.89   22.00
   4  -4   3    9.30   33.20
   4  -4   3   35.60   36.10
   4  -4   3   -6.50   11.60
   4  -4   3   -3.50   22.50
   4  -4   3   10.00   15.70
   5  -4   3   -9.40   44.30
   5   3  -3   83.49   27.20
  -5  -3   3   60.89   68.29
   4   3  -3   85.09   21.10
   4   3  -3  141.99   22.10
  -4  -3   3  136.19   63.09
  -4  -3   3  122.19   40.40
   3   3  -3  154.98   21.70
   3   3  -3  133.39   19.70
  -3  -3   3  149.09   23.80
  -3  -3   3  173.68   34.70
  -3  -3   3  131.19   25.60
  -3  -3   3  147.19   41.50
   2   3  -3   15.00   10.90
   2   3  -3   16.60    9.50
   2   3  -3   10.50   17.20
  -2  -3   3   44.70   11.70
  -2  -3   3  -16.80   26.40
  -2  -3   3   25.00   20.40
  -2  -3   3   17.50   11.30
   1   3  -3    9.40    6.50
   1   3  -3   21.70   13.00
   1   3  -3   18.60   18.10
   1   3  -3   19.90   12.60
   1   3  -3   24.70    9.80
  -1  -3   3   19.20    9.30
  -1  -3   3    5.40    8.40
  -1  -3   3    8.00   22.40
  -1  -3   3   23.70   14.50
  -1  -3   3    4.30    8.90
   0   3  -3  262.37   20.00
   0   3  -3  263.07   23.90
   0   3  -3  253.57   24.20
   0   3  -3  253.27   21.80
   0   3  -3  230.78   21.70
   0  -3   3  271.77   20.80
   0  -3   3  300.17   23.50
   0  -3   3  262.97   25.00
   0  -3   3  244.88   27.90
   0  -3   3  230.48   27.70
   0  -3   3  203.98   22.90
  -1   3  -3  170.28   18.20
  -1   3  -3  141.29   24.60
   1  -3   3  127.49   18.50
   1  -3   3  145.19   27.60
   1  -3   3  147.99   18.50
   1  -3   3  146.09   16.90
   1  -3   3  204.98   25.60
   1  -3   3  139.09   12.80
   1  -3   3  150.88   17.50
  -2   3  -3  378.46   33.60
  -2   3  -3  319.97   28.00
  -2   3  -3  318.97   36.50
   2  -3   3  326.27   37.00
   2  -3   3  326.37   31.50
   2  -3   3  385.06   39.20
   2  -3   3  317.57   29.10
   2  -3   3  305.77   29.70
  -3   3  -3 1047.90   69.29
   3  -3   3  891.11   59.39
   3  -3   3  889.01   76.79
   3  -3   3  827.82   58.09
   3  -3   3  913.81   64.79
   3  -3   3  952.40   77.39
   3  -3   3  928.81   70.19
   3  -3   3  872.01   60.39
  -4   3  -3  140.59   32.20
   4  -3   3  175.28   50.99
   4  -3   3  117.59   16.60
   4  -3   3  122.79   36.00
   4  -3   3   52.29   50.39
   4  -3   3   99.29   16.90
   4  -3   3  154.78   27.20
   4  -3   3  122.79   32.90
   5  -3   3  -51.99   39.50
   5  -3   3    6.90   18.60
   5   2  -3  430.16   46.30
  -5  -2   3  488.95   79.89
   4   2  -3   42.60   20.80
   4   2  -3   38.80   13.80
  -4  -2   3   56.99   44.00
   3   2  -3    3.80   12.20
   3   2  -3    7.00   23.40
   3   2  -3   -8.30   10.40
  -3  -2   3  -12.20   22.70
  -3  -2   3  -21.10   28.20
  -3  -2   3  -14.90   12.10
  -3  -2   3   18.70   15.20
   2   2  -3  236.18   27.80
   2   2  -3  182.68   18.30
   2   2  -3  157.68   16.40
  -2  -2   3  200.38   37.20
  -2  -2   3  175.58   19.60
  -2  -2   3  147.29   27.40
  -2  -2   3  154.48   17.70
   1   2  -3   29.70   17.30
   1   2  -3    2.40   10.50
   1   2  -3   22.80    7.50
   1   2  -3    5.70   13.60
   1   2  -3   10.40    6.50
  -1  -2   3   13.80    7.10
  -1  -2   3   27.20   12.80
  -1  -2   3   12.40    7.50
  -1  -2   3    8.70   17.70
   0   2  -3 4345.57  270.87
   0   2  -3 4193.08  268.77
   0   2  -3 4313.47  270.17
   0   2  -3 4426.66  269.77
   0   2  -3 4503.15  273.47
   0   2  -3 4510.55  270.97
   0  -2   3 3813.72  271.77
   0  -2   3 4155.88  271.37
   0  -2   3 4191.38  270.97
   0  -2   3 4204.48  269.27
   0  -2   3 4317.27  272.17
   0  -2   3 4401.46  272.57
  -1   2  -3 5666.23  340.07
  -1   2  -3 5328.27  339.47
  -1   2  -3 5035.30  337.37
  -1   2  -3 5201.18  337.47
   1  -2   3 5579.74  337.07
   1  -2   3 5467.95  338.27
   1  -2   3 5438.16  338.17
   1  -2   3 5313.97  340.97
   1  -2   3 4990.60  335.57
   1  -2   3 5608.24  338.67
  -2   2  -3   55.59   15.50
  -2   2  -3   41.70   11.40
   2  -2   3   30.50   19.00
   2  -2   3   32.20    5.90
   2  -2   3   43.80    6.80
   2  -2   3   25.60   16.80
   2  -2   3   33.10   10.90
   2  -2   3   45.50   14.60
  -3   2  -3   31.60   11.40
  -3   2  -3   26.60   17.90
   3  -2   3   31.40    7.80
   3  -2   3   33.20    7.00
   3  -2   3   26.50   25.50
   3  -2   3   28.10   12.80
   3  -2   3   29.40   19.00
   3  -2   3   24.70   26.80
   3  -2   3   40.20   12.90
  -4   2  -3   20.40   23.90
   4  -2   3  109.39   37.50
   4  -2   3   26.20   11.80
   4  -2   3   13.90   15.20
   4  -2   3   55.49   32.50
   4  -2   3   15.20   28.70
  -5   2  -3  241.18   48.30
   5  -2   3  210.58   29.50
   5  -2   3  175.78   55.99
   5  -2   3  144.29   47.20
   5   1  -3   33.50   22.50
  -5  -1   3   38.00   39.00
  -5  -1   3   77.39   56.49
   4   1  -3  112.09   16.30
   4   1  -3   99.29   21.90
  -4  -1   3  114.79   23.40
  -4  -1   3  114.69   42.10
  -4  -1   3  116.09   22.90
   3   1  -3   17.80    9.50
   3   1  -3   14.00   23.80
   3   1  -3   21.50   11.70
  -3  -1   3   16.50   12.60
  -3  -1   3   18.00   21.60
  -3  -1   3   36.60   13.80
  -3  -1   3  -11.10   29.70
   2   1  -3 1165.08   76.99
   2   1  -3 1252.67   81.59
   2   1  -3 1179.98   76.69
   2   1  -3 1053.49   85.89
  -2  -1   3 1157.98   81.69
  -2  -1   3 1207.58   77.49
  -2  -1   3 1124.39   76.69
  -2  -1   3 1117.79   88.09
   1   1  -3 7723.23  487.95
   1   1  -3 7864.81  484.45
   1   1  -3 8151.98  486.55
   1   1  -3 6800.32  493.05
   1   1  -3 7854.11  484.25
  -1  -1   3 7839.92  486.65
  -1  -1   3 7795.82  490.85
   0   1  -3    0.00    7.60
   0   1  -3   12.10    8.20
   0   1  -3   10.10    4.20
   0   1  -3    9.80    7.10
   0   1  -3   12.70    5.10
   0  -1   3   -6.10    7.70
   0  -1   3    5.10    6.90
   0  -1   3   12.90    4.90
   0  -1   3   14.20    8.50
   0  -1   3   17.70    5.50
  -1   1  -3   76.79    7.40
  -1   1  -3   57.99    5.90
  -1   1  -3   66.89    8.70
  -1   1  -3   55.89   10.00
  -1   1  -3   59.49   11.80
  -1   1  -3   70.89   12.40
   1  -1   3   68.39    7.30
   1  -1   3   76.09   12.60
   1  -1   3   57.89   10.70
   1  -1   3   78.29   10.60
   1  -1   3   88.89    9.30
   1  -1   3   65.39   13.70
   1  -1   3   71.29    8.00
  -2   1  -3  317.17   27.70
  -2   1  -3  305.27   23.10
   2  -1   3  300.27   29.80
   2  -1   3  329.27   27.70
   2  -1   3  327.47   23.20
   2  -1   3  314.27   23.30
   2  -1   3  289.37   27.60
  -3   1  -3  177.08   17.40
  -3   1  -3  215.88   27.50
   3  -1   3  202.38   27.70
   3  -1   3  211.98   25.10
   3  -1   3  207.58   17.90
  -4   1  -3  133.19   29.10
   4  -1   3  151.88   34.10
   4  -1   3   96.49   17.40
   4  -1   3  157.38   36.50
  -5   1  -3   58.09   33.30
   5  -1   3   29.50   17.20
   5  -1   3  100.89   50.59
   5  -1   3    4.00   38.30
  -6   1  -3   47.20   54.39
   6  -1   3   68.69   48.00
   6  -1   3   62.99   27.60
   5   0  -3  101.99   24.80
   5   0  -3   57.59   26.80
  -5   0   3   61.09   37.70
  -5   0   3   54.59   47.60
   4   0  -3   33.50   38.00
   4   0  -3   53.29   17.90
   4   0  -3   55.29   16.60
  -4   0   3   58.09   35.90
  -4   0   3   65.89   19.10
  -4   0   3   63.09   23.90
  -4   0   3   40.90   20.50
   3   0  -3  786.62   54.99
   3   0  -3  785.12   64.99
   3   0  -3  797.72   55.59
  -3   0   3  797.72   55.59
  -3   0   3  656.23   67.39
  -3   0   3  816.52   55.09
   2   0  -3   44.20    8.80
   2   0  -3   34.20    8.50
   2   0  -3   59.99   20.70
   2   0  -3   52.19   14.80
  -2   0   3   51.59   21.40
  -2   0   3   30.90    9.50
  -2   0   3   31.00   14.10
  -2   0   3   46.30   10.30
   1   0  -3   66.49   18.10
   1   0  -3   57.19   10.60
   1   0  -3   41.50    8.50
   1   0  -3   48.70    8.40
   1   0  -3   62.69   15.00
  -1   0   3   55.99   11.20
  -1   0   3   51.79    8.30
  -1   0   3   44.10    8.40
  -1   0   3   58.79   16.10
  -1   0   3   53.29    9.10
   0   0  -3   61.69   10.80
   0   0  -3   40.10    8.30
   0   0  -3   41.30    7.70
   0   0  -3   55.99    7.30
   0   0  -3   77.79   13.50
   0   0  -3   50.79    8.60
   0   0   3   65.69   12.70
   0   0   3   60.19    7.30
   0   0   3   42.00    9.20
   0   0   3   59.09   11.90
   0   0   3   55.29    8.10
  -1   0  -3  331.27   24.50
  -1   0  -3  329.97   27.20
  -1   0  -3  372.16   27.00
  -1   0  -3  399.06   25.10
  -1   0  -3  312.87   22.70
   1   0   3  373.06   27.50
   1   0   3  367.46   24.80
   1   0   3  331.87   22.70
   1   0   3  294.07   27.20
  -2   0  -3   29.60    5.50
  -2   0  -3   10.40   24.60
  -2   0  -3    5.40   11.90
  -2   0  -3   13.90    6.20
   2   0   3   12.30    8.50
   2   0   3   28.50   11.00
   2   0   3   28.30    7.80
  -3   0  -3  -12.00   16.10
  -3   0  -3   -7.50    7.00
  -3   0  -3   -1.80    5.60
  -3   0  -3   -1.20    6.50
   3   0   3   16.40   18.80
   3   0   3   -5.20   13.70
   3   0   3    2.70    7.80
  -4   0  -3  597.34   38.90
  -4   0  -3  585.84   40.40
  -4   0  -3  556.74   54.29
   4   0   3  563.14   53.59
   4   0   3  516.35   62.99
   4   0   3  583.04   43.30
  -5   0  -3   16.60   34.30
   5   0   3   23.50   50.09
   5   0   3   10.50   15.40
   6   0   3   72.99   29.60
   6   0   3   96.39   47.90
   5  -1  -3   55.59   24.30
   5  -1  -3   17.00   24.50
  -5   1   3   11.40   43.00
   4  -1  -3   -3.60   15.50
   4  -1  -3    3.70   14.80
   4  -1  -3   38.10   36.30
  -4   1   3   29.90   19.90
  -4   1   3   -1.70   19.80
  -4   1   3  -50.09   31.90
   3  -1  -3 1640.94  102.89
   3  -1  -3 1495.35  102.19
   3  -1  -3 1463.35  114.69
   3  -1  -3 1551.84  108.39
  -3   1   3 1535.25  101.99
  -3   1   3 1583.64  101.89
  -3   1   3 1532.75  110.69
   2  -1  -3   21.00    8.30
   2  -1  -3   18.90   12.70
   2  -1  -3   22.60   21.20
   2  -1  -3    8.50    8.40
  -2   1   3   11.30   12.10
  -2   1   3   11.40    8.60
  -2   1   3    4.80   19.80
  -2   1   3   -2.10   11.20
   1  -1  -3 1179.18   75.19
   1  -1  -3 1150.98   82.59
   1  -1  -3 1157.98   74.89
   1  -1  -3 1050.19   82.99
   1  -1  -3 1203.78   74.79
  -1   1   3 1138.79   75.09
  -1   1   3 1121.79   75.49
  -1   1   3 1155.58   74.99
   0  -1  -3   18.40    6.70
   0  -1  -3   13.20    6.10
   0  -1  -3   25.80    8.70
   0  -1  -3   15.70    4.90
   0  -1  -3    6.40    9.00
   0  -1  -3   29.70   12.70
   0   1   3   34.70    7.50
   0   1   3   16.30    4.60
   0   1   3   -7.80    9.70
   0   1   3   14.80    8.90
   0   1   3   19.90    5.40
  -1  -1  -3   34.30    9.40
  -1  -1  -3   20.90    4.30
  -1  -1  -3   25.40    9.50
  -1  -1  -3   20.50    6.60
  -1  -1  -3   32.60    7.70
   1   1   3   20.00    6.10
   1   1   3   24.30    4.70
   1   1   3   16.00    8.90
   1   1   3   19.60    8.00
   1   1   3   23.20    8.80
  -2  -1  -3  926.51   58.59
  -2  -1  -3  892.51   59.39
  -2  -1  -3  780.42   62.49
  -2  -1  -3  883.61   55.99
   2   1   3  930.91   61.49
   2   1   3  769.82   61.19
   2   1   3  977.90   59.99
  -3  -1  -3   21.60   17.80
  -3  -1  -3   13.60   11.60
   3   1   3    1.40    8.90
   3   1   3   16.80   13.90
   3   1   3   41.00   20.10
  -4  -1  -3 1978.80  144.89
  -4  -1  -3 2229.18  135.39
  -4  -1  -3 2326.27  138.49
   4   1   3 2027.80  142.99
   4   1   3 1717.93  148.29
   4   1   3 2231.38  138.49
  -5  -1  -3  562.64   64.69
  -5  -1  -3  624.24   51.29
  -5  -1  -3  611.24   44.50
   5   1   3  585.24   50.69
   5   1   3  592.94   61.39
  -6  -1  -3   73.19   29.20
  -6  -1  -3   60.89   57.79
   6   1   3   36.60   31.00
   6   1   3   87.99   44.20
   5  -2  -3  713.93   63.19
   5  -2  -3  751.22   64.69
   4  -2  -3  341.77   35.70
   4  -2  -3  299.37   58.29
   4  -2  -3  362.56   36.60
  -4   2   3  396.26   33.00
  -4   2   3  242.18   39.00
   3  -2  -3  114.79   19.60
   3  -2  -3  114.39   32.10
   3  -2  -3  138.09   26.50
   3  -2  -3  121.79   19.70
  -3   2   3  157.28   20.80
  -3   2   3   98.69   18.70
  -3   2   3   88.19   23.70
   2  -2  -3  113.79   15.90
   2  -2  -3  111.19   18.60
   2  -2  -3  137.39   25.90
   2  -2  -3  127.99   16.40
  -2   2   3  122.49   24.10
  -2   2   3   92.19   16.50
  -2   2   3  107.19   16.40
   1  -2  -3    6.50    7.70
   1  -2  -3  -11.80   19.40
   1  -2  -3   -3.90    5.00
   1  -2  -3   19.40   17.50
   1  -2  -3    1.40   12.30
   1  -2  -3    9.40    6.50
  -1   2   3   -4.30    6.80
  -1   2   3   -2.30    6.90
  -1   2   3    0.40    9.10
   0  -2  -3  540.45   37.20
   0  -2  -3  521.35   35.70
   0  -2  -3  550.64   39.30
   0  -2  -3  550.54   40.70
   0  -2  -3  519.45   41.10
   0   2   3  492.85   37.50
   0   2   3  468.05   39.80
   0   2   3  523.05   35.70
   0   2   3  525.55   38.80
   0   2   3  511.65   34.10
  -1  -2  -3   -2.20    9.70
  -1  -2  -3   10.90    7.90
  -1  -2  -3    2.60    7.90
  -1  -2  -3   -2.20    4.90
  -1  -2  -3   -6.90    8.00
   1   2   3    0.60    9.70
   1   2   3    8.40   12.00
   1   2   3   11.30    8.60
   1   2   3    9.80    8.60
  -2  -2  -3 1087.59   71.39
  -2  -2  -3 1160.08   73.89
  -2  -2  -3 1146.69   75.89
   2   2   3  978.50   77.19
   2   2   3 1057.69   74.39
   2   2   3 1180.28   74.49
  -3  -2  -3 2185.18  137.09
  -3  -2  -3 2258.17  140.99
   3   2   3 2160.38  138.39
   3   2   3 2096.09  140.09
   3   2   3 1873.41  143.49
  -4  -2  -3  146.39   15.10
  -4  -2  -3  152.18   21.70
  -4  -2  -3  158.38   30.60
   4   2   3  179.38   30.50
   4   2   3  156.68   24.20
   4   2   3  132.39   43.30
  -5  -2  -3   46.10   39.50
  -5  -2  -3   12.40   29.60
  -5  -2  -3  -34.60   19.00
   5   2   3   10.30   29.90
   5   2   3   -3.10   20.80
  -6  -2  -3  390.26   59.79
  -6  -2  -3  269.37   69.99
   6   2   3  286.17   51.69
   6   2   3  357.96   64.59
   4  -3  -3    6.90   19.40
   3  -3  -3  160.78   27.90
   3  -3  -3  128.39   23.80
   3  -3  -3  163.28   24.20
   3  -3  -3  217.98   38.40
  -3   3   3  116.29   22.00
   2  -3  -3  224.08   23.20
   2  -3  -3  161.78   32.40
   2  -3  -3  195.98   38.90
   2  -3  -3  206.38   22.40
  -2   3   3  157.08   29.20
  -2   3   3  193.68   21.20
  -2   3   3  220.28   22.70
   1  -3  -3  137.89   18.50
   1  -3  -3  191.08   32.50
   1  -3  -3  192.18   36.00
   1  -3  -3  136.19   17.40
   1  -3  -3  179.38   25.50
  -1   3   3  172.78   19.70
  -1   3   3  159.18   17.30
   0  -3  -3   22.10    7.80
   0  -3  -3   10.50   18.40
   0  -3  -3   24.50   13.20
   0  -3  -3   45.90   17.70
   0  -3  -3   14.00   10.00
   0   3   3   29.80   12.70
   0   3   3    6.20   15.90
   0   3   3   14.00   10.80
  -1  -3  -3   31.60   14.30
  -1  -3  -3   60.59   13.80
  -1  -3  -3   49.10   14.60
  -1  -3  -3   40.00   14.40
  -1  -3  -3   40.10    8.40
   1   3   3   40.80   16.90
   1   3   3   64.49   13.30
   1   3   3   55.49   13.10
   1   3   3   39.60   16.40
  -2  -3  -3   14.80   15.80
  -2  -3  -3   29.20   15.80
  -2  -3  -3  -13.40   10.50
  -2  -3  -3    6.00    7.70
   2   3   3   12.80    9.90
   2   3   3    8.40   10.70
   2   3   3   12.90   11.20
   2   3   3   25.90   20.40
  -3  -3  -3   10.80   13.30
  -3  -3  -3   36.00   21.00
   3   3   3    3.70   14.50
   3   3   3   29.90   30.10
   3   3   3    5.80   11.40
   3   3   3   18.10   19.30
  -4  -3  -3  368.56   46.80
  -4  -3  -3  481.95   37.80
   4   3   3  323.07   40.30
   4   3   3  391.16   36.70
   4   3   3  301.37   47.60
  -5  -3  -3   -6.00   15.20
  -5  -3  -3  -11.40   33.60
   5   3   3   54.69   22.00
   5   3   3   37.50   28.80
  -6  -3  -3   26.60   52.19
  -6  -3  -3   92.79   65.49
   6   3   3   53.19   45.00
   6   3   3   29.10   31.20
   4  -4  -3    3.80   24.30
   4  -4  -3   47.90   26.00
   3  -4  -3  160.48   41.10
   3  -4  -3  190.08   30.80
   3  -4  -3  184.68   29.20
   2  -4  -3  505.25   46.70
   2  -4  -3  394.66   35.90
   2  -4  -3  390.06   62.69
   2  -4  -3  339.57   67.09
   2  -4  -3  410.06   36.60
  -2   4   3  406.16   36.60
   1  -4  -3  215.18   45.20
   1  -4  -3  265.17   39.80
   1  -4  -3  126.39   20.40
   1  -4  -3  152.98   24.30
   1  -4  -3  154.78   23.90
  -1   4   3  118.89   23.70
   0  -4  -3   54.49   15.90
   0  -4  -3   42.30   13.10
   0  -4  -3   72.29   18.00
   0  -4  -3   33.60   20.50
   0  -4  -3   62.39   24.30
   0   4   3   41.80   18.40
   0   4   3   34.60   21.90
   0   4   3   37.50   13.80
  -1  -4  -3 2105.99  128.99
  -1  -4  -3 2107.79  132.99
  -1  -4  -3 1909.11  129.79
  -1  -4  -3 2132.69  133.59
  -1  -4  -3 2022.60  129.59
   1   4   3 1969.20  134.39
   1   4   3 1972.20  129.79
   1   4   3 1821.22  132.49
   1   4   3 1804.62  127.09
   1   4   3 1886.61  129.69
  -2  -4  -3  224.88   28.70
  -2  -4  -3  220.28   35.70
  -2  -4  -3  311.27   33.00
   2   4   3  272.47   26.00
   2   4   3  254.67   30.40
   2   4   3  262.77   31.30
   2   4   3  243.38   26.10
   2   4   3  246.08   40.90
  -3  -4  -3  250.17   42.10
  -3  -4  -3  231.98   30.40
  -3  -4  -3  187.18   26.20
   3   4   3  211.38   27.00
   3   4   3  188.08   29.70
   3   4   3  205.28   42.10
   3   4   3  151.58   31.00
   3   4   3  223.38   28.10
  -4  -4  -3   20.60   31.60
   4   4   3   10.80   22.70
   4   4   3  -25.30   17.10
  -5  -4  -3   64.19   43.40
  -5  -4  -3  -28.00   17.80
   5   4   3   -5.40   24.40
   5   4   3   19.80   31.80
   3  -5  -3   62.19   25.70
   3  -5  -3   72.99   47.40
   3  -5  -3   41.80   24.70
   2  -5  -3  127.99   41.60
   2  -5  -3  191.48   35.70
   2  -5  -3  259.47   32.90
   2  -5  -3  169.88   30.80
   2  -5  -3  186.18   56.29
   1  -5  -3 1912.51  118.19
   1  -5  -3 1809.12  123.39
   1  -5  -3 1655.83  115.99
   1  -5  -3 1774.42  118.69
   1  -5  -3 1441.86  130.59
   0  -5  -3  176.58   23.10
   0  -5  -3  122.29   34.20
   0  -5  -3   60.79   22.20
   0  -5  -3  157.78   31.70
   0  -5  -3  195.38   33.80
   0   5   3  114.29   32.80
   0   5   3   97.19   25.30
  -1  -5  -3   31.00   19.20
  -1  -5  -3   13.50   29.90
  -1  -5  -3   45.10   14.40
  -1  -5  -3   34.30   23.60
   1   5   3   77.59   15.20
   1   5   3   43.50   17.10
   1   5   3   38.20   29.50
   1   5   3   60.09   23.80
   1   5   3   33.60   20.00
  -2  -5  -3   31.70   28.00
  -2  -5  -3   56.69   24.30
  -2  -5  -3   25.50   19.80
  -2  -5  -3  113.59   20.10
   2   5   3   52.19   19.30
   2   5   3   71.09   19.70
   2   5   3   16.80   34.50
   2   5   3   74.09   24.80
   2   5   3   80.79   22.70
  -3  -5  -3    1.10   31.40
  -3  -5  -3    5.80   20.70
   3   5   3   22.60   18.40
   3   5   3   11.10   22.10
   3   5   3   13.20   17.10
   3   5   3  -21.40   25.80
   3   5   3   35.70   39.70
  -4  -5  -3   -1.80   25.40
  -4  -5  -3   25.30   41.00
   4   5   3   18.70   22.30
   4   5   3   50.09   26.70
   4   5   3   58.19   28.80
  -5  -5  -3  192.68   58.89
  -5  -5  -3  144.09   33.40
   5   5   3  124.39   31.50
   5   5   3  139.59   45.70
   3  -6  -3  377.56   54.39
   3  -6  -3  470.85   55.79
   2  -6  -3   67.79   30.30
   2  -6  -3   44.30   63.69
   2  -6  -3   -0.70   42.80
   2  -6  -3  -23.60   24.70
   1  -6  -3   59.99   30.80
   1  -6  -3  101.29   31.40
   1  -6  -3   36.90   20.90
   1  -6  -3  108.99   34.90
   1  -6  -3  -27.90   41.10
   0  -6  -3   54.39   32.20
   0  -6  -3  -28.90   26.30
   0  -6  -3   19.30   19.30
   0  -6  -3  -23.10   25.00
   0   6   3    9.00   15.90
   0   6   3    8.30   27.00
   0   6   3  -25.60   36.40
  -1  -6  -3  256.97   32.20
  -1  -6  -3  313.27   47.10
  -1  -6  -3  251.87   40.10
   1   6   3  240.38   25.70
   1   6   3  216.68   31.90
   1   6   3  193.48   39.30
   1   6   3  285.17   50.09
  -2  -6  -3   -1.50   17.10
  -2  -6  -3  -11.00   29.40
  -2  -6  -3  -26.90   32.80
  -2  -6  -3   10.10   27.70
   2   6   3  -55.49   32.40
   2   6   3   22.80   25.90
   2   6   3  -19.00   21.60
   2   6   3   18.60   42.00
   2   6   3   64.19   24.40
  -3  -6  -3   42.40   41.40
  -3  -6  -3   50.59   37.30
   3   6   3    8.80   24.90
   3   6   3   12.20   19.90
   3   6   3    5.00   32.70
   3   6   3   75.29   35.80
  -4  -6  -3   32.50   38.90
  -4  -6  -3  108.49   52.09
   4   6   3    2.00   26.80
   4   6   3  -13.20   35.90
   4   6   3    2.00   28.90
   1  -7  -3  122.49   30.10
   1  -7  -3  201.68   44.10
   0  -7  -3  117.09   28.20
   0  -7  -3  199.38   44.40
   0   7   3   87.49   53.69
  -1  -7  -3   19.20   38.50
  -1  -7  -3   19.60   21.10
   1   7   3   80.19   43.50
   1   7   3   44.30   24.30
   1   7   3   26.60   51.59
  -2  -7  -3  261.37   52.89
  -2  -7  -3  246.88   39.20
   2   7   3  279.77   54.79
   2   7   3  174.58   67.59
   2   7   3  207.98   35.60
   2   7   3  239.48   36.10
  -3  -7  -3   42.60   26.20
  -3  -7  -3   73.79   53.59
   3   7   3  -61.09   43.10
   3   7   3   -6.20   33.30
   3   7   3   20.50   31.40
  -4  -7  -3  385.56   75.19
   4   7   3  218.08   58.29
   0  -8  -3  276.67   50.49
   0   8   3  176.78   74.49
  -1  -8  -3  -19.80   31.00
  -1  -8  -3   -1.30   49.90
   1   8   3  -33.50   55.99
  -2  -8  -3  544.95   83.49
  -2  -8  -3  300.47   52.19
   2   8   3  378.26   56.49
   2   8   3  408.46   80.69
   2   7  -4   51.19   45.50
   2   7  -4   14.80   24.50
  -2  -7   4  103.19   69.69
  -2  -7   4   39.90   51.29
   1   7  -4  115.29   49.60
  -1  -7   4   60.69   66.79
  -1  -7   4   12.20   43.00
   0   7  -4   45.10   51.59
   0  -7   4  -14.10   50.29
   0  -7   4   65.69   58.29
  -1   7  -4   62.09   51.99
   1  -7   4   46.80   40.70
   1  -7   4   15.40   47.40
  -2   7  -4   54.39   66.09
   2  -7   4   13.00   25.20
   2  -7   4   27.40   38.40
   3   6  -4  231.68   40.80
   3   6  -4  216.48   47.90
   3   6  -4  263.77   44.20
  -3  -6   4  282.77   61.59
  -3  -6   4   69.29   69.79
   2   6  -4  -48.60   31.70
   2   6  -4   46.50   20.10
   2   6  -4   38.70   47.60
   2   6  -4   -1.40   25.70
  -2  -6   4  -11.30   41.00
  -2  -6   4  -25.80   50.09
   1   6  -4   41.50   24.80
   1   6  -4   50.89   15.20
   1   6  -4   62.39   41.30
  -1  -6   4   69.89   35.40
  -1  -6   4   80.29   46.90
   0   6  -4   43.70   36.00
   0  -6   4   50.69   31.40
   0  -6   4   94.49   41.40
   0  -6   4   74.29   24.70
  -1   6  -4   95.19   42.60
  -1   6  -4   71.39   29.20
   1  -6   4   31.10   20.20
   1  -6   4   96.79   37.90
   1  -6   4   18.80   27.50
  -2   6  -4  569.44   83.49
   2  -6   4  457.05   45.60
   2  -6   4  498.25   46.60
   2  -6   4  400.66   55.29
   2  -6   4  465.25   49.99
   3  -6   4  792.92   65.79
   3  -6   4  833.52   72.49
   3  -6   4  880.21   76.19
   4   5  -4    9.80   24.30
   4   5  -4  -22.90   31.70
  -4  -5   4   91.59   73.49
  -4  -5   4   81.39   56.19
   3   5  -4  -43.10   43.60
   3   5  -4  -25.00   20.90
   3   5  -4    9.40   18.20
  -3  -5   4   19.80   48.00
  -3  -5   4   61.49   46.20
   2   5  -4   67.89   39.30
   2   5  -4   49.50   31.90
   2   5  -4    6.40   13.50
   2   5  -4    5.00   19.60
   2   5  -4   -4.30   23.30
  -2  -5   4  -35.60   29.70
  -2  -5   4    2.10   42.50
   1   5  -4   97.69   28.20
   1   5  -4   74.79   28.40
   1   5  -4  100.39   19.10
   1   5  -4  104.89   23.30
   1   5  -4   95.19   28.30
  -1  -5   4  102.79   26.40
  -1  -5   4   99.09   22.50
  -1  -5   4   99.99   38.60
  -1  -5   4  121.09   29.50
   0   5  -4  795.72   63.59
   0   5  -4  676.83   54.09
   0   5  -4  732.93   57.29
   0  -5   4  695.53   53.49
   0  -5   4  668.63   58.69
   0  -5   4  682.53   70.69
   0  -5   4  732.83   60.79
  -1   5  -4 1084.89   80.69
  -1   5  -4 1155.68   88.99
   1  -5   4 1127.69   76.39
   1  -5   4 1084.49   86.09
   1  -5   4 1209.28   82.39
  -2   5  -4   23.20   37.20
  -2   5  -4   37.60   22.50
   2  -5   4   39.80   39.30
   2  -5   4   12.30   11.50
   2  -5   4    8.20   20.10
   2  -5   4   10.90   20.50
   3  -5   4   94.39   33.50
   3  -5   4   55.69   24.60
   3  -5   4   57.69   19.90
   4  -5   4  296.57   36.90
   4  -5   4  238.18   45.90
   4  -5   4  401.86   62.29
   4   4  -4  -30.00   25.50
   4   4  -4    4.70   20.40
  -4  -4   4  -13.60   43.80
  -4  -4   4  -93.49   59.19
   3   4  -4  150.98   25.30
   3   4  -4   78.79   19.90
   3   4  -4  181.88   51.29
  -3  -4   4  100.39   57.19
  -3  -4   4  138.79   50.19
   2   4  -4   22.70   16.40
   2   4  -4   25.30   12.00
   2   4  -4   30.20   29.00
   2   4  -4   35.50   36.70
  -2  -4   4   26.70   26.90
  -2  -4   4    6.80   35.10
  -2  -4   4   -7.70   13.90
   1   4  -4  863.01   60.19
   1   4  -4  760.62   51.69
   1   4  -4  726.43   61.59
   1   4  -4  755.52   54.29
   1   4  -4  701.63   58.29
   1   4  -4  711.23   52.39
  -1  -4   4  669.63   69.69
  -1  -4   4  703.83   54.39
  -1  -4   4  724.73   61.59
  -1  -4   4  776.52   54.89
  -1  -4   4  720.73   54.49
   0   4  -4  142.39   22.30
   0   4  -4  105.79   23.20
   0   4  -4  137.19   20.90
   0   4  -4  110.69   12.80
   0   4  -4  118.49   17.40
   0   4  -4  112.99   15.80
   0  -4   4   91.59   21.70
   0  -4   4  103.49   16.40
   0  -4   4  139.49   32.00
   0  -4   4  103.79   31.10
   0  -4   4  133.09   23.30
  -1   4  -4   25.70   14.00
  -1   4  -4   -9.10   22.70
   1  -4   4   11.10   17.20
   1  -4   4   23.90   19.10
   1  -4   4    7.10   13.90
   1  -4   4   46.70   27.70
  -2   4  -4  419.86   50.19
  -2   4  -4  388.36   35.00
   2  -4   4  401.46   36.30
   2  -4   4  434.76   50.59
   2  -4   4  477.95   40.80
   2  -4   4  384.36   28.70
   2  -4   4  408.36   47.50
   2  -4   4  465.45   39.10
   2  -4   4  326.47   32.90
  -3   4  -4   -8.00   19.20
   3  -4   4   20.40   27.30
   3  -4   4  -19.70   25.40
   3  -4   4    6.30   18.10
   3  -4   4    6.20   13.60
   3  -4   4   31.50   38.10
   4  -4   4    6.80   14.70
   4  -4   4  -28.10   59.29
   4  -4   4   15.80   24.90
   4  -4   4    7.60   34.50
   4  -4   4   33.70   15.00
   5  -4   4   19.60   35.00
   5  -4   4  -25.70   49.00
   4   3  -4   94.39   22.80
   4   3  -4   84.69   23.60
  -4  -3   4   38.60   40.20
  -4  -3   4   81.19   53.89
   3   3  -4   26.70   14.70
   3   3  -4   20.00   15.30
   3   3  -4   93.89   40.60
  -3  -3   4   18.50   39.10
  -3  -3   4   55.99   33.40
   2   3  -4  214.08   35.80
   2   3  -4  176.88   21.90
   2   3  -4  146.19   37.00
   2   3  -4  205.98   21.40
  -2  -3   4  144.69   38.30
  -2  -3   4  242.28   35.80
   1   3  -4  671.63   60.49
   1   3  -4  804.92   58.29
   1   3  -4  750.62   53.69
   1   3  -4  762.02   52.59
   1   3  -4  820.22   56.89
  -1  -3   4  790.92   68.89
  -1  -3   4  738.13   53.69
  -1  -3   4  799.92   54.09
  -1  -3   4  746.73   60.29
   0   3  -4   21.70    6.20
   0   3  -4   19.30   10.00
   0   3  -4   12.20   11.60
   0   3  -4   24.40   11.70
   0   3  -4   36.80   13.10
   0   3  -4    6.50   11.00
   0  -3   4    5.70    8.70
   0  -3   4   27.10   14.60
   0  -3   4   15.80    9.10
   0  -3   4   40.90   18.70
   0  -3   4   -4.70   11.00
   0  -3   4   11.80   16.70
  -1   3  -4   11.80   13.10
  -1   3  -4  -17.80   15.70
  -1   3  -4   10.50   10.70
   1  -3   4    5.80   11.50
   1  -3   4    5.90   12.90
   1  -3   4    6.10   10.60
   1  -3   4   15.40    7.90
   1  -3   4    1.00   16.80
   1  -3   4    3.70   12.60
  -2   3  -4   41.80   15.30
  -2   3  -4   53.09   21.60
  -2   3  -4   30.90   18.90
   2  -3   4   30.50   26.70
   2  -3   4   39.70   21.40
   2  -3   4   42.20   15.30
   2  -3   4   41.00   13.50
   2  -3   4   33.40   10.60
   2  -3   4   36.50   17.50
  -3   3  -4   34.50   20.60
  -3   3  -4   46.10   15.40
   3  -3   4  -15.70   37.00
   3  -3   4   53.79   23.40
   3  -3   4   32.20   17.70
   3  -3   4   15.50   11.70
   3  -3   4    2.30   29.20
   3  -3   4   14.80   16.40
   3  -3   4   12.70   10.10
   3  -3   4   27.90    9.80
  -4   3  -4  227.48   40.60
   4  -3   4  148.99   22.50
   4  -3   4  230.88   51.29
   4  -3   4  100.09   34.60
   4  -3   4  119.29   27.60
   4  -3   4  151.58   36.70
  -5   3  -4   97.79   42.60
   5  -3   4   25.50   24.20
   5  -3   4   79.09   44.70
   5   2  -4   65.89   27.60
  -5  -2   4  -33.30   70.89
   4   2  -4   24.10   18.50
   4   2  -4   20.40   18.80
  -4  -2   4   67.99   38.50
  -4  -2   4  100.69   55.09
   3   2  -4 2356.16  154.58
   3   2  -4 2282.77  146.19
   3   2  -4 2231.98  143.59
  -3  -2   4 2289.87  147.39
  -3  -2   4 2174.48  154.78
  -3  -2   4 2110.39  162.38
  -3  -2   4 2107.89  145.59
   2   2  -4   73.49   13.20
   2   2  -4   60.29   12.00
   2   2  -4   77.19   31.30
   2   2  -4   57.19   25.90
   2   2  -4   63.69   20.10
  -2  -2   4   58.19   32.90
  -2  -2   4   40.20   14.70
  -2  -2   4   13.10   19.30
  -2  -2   4   83.89   14.60
   1   2  -4   27.00    8.80
   1   2  -4   24.10    7.50
   1   2  -4   12.00   17.40
   1   2  -4   43.30   15.80
  -1  -2   4   28.70   24.40
  -1  -2   4   22.70   10.10
  -1  -2   4   19.30    8.50
  -1  -2   4   41.40   15.80
   0   2  -4  206.18   19.60
   0   2  -4  170.58   16.30
   0   2  -4  184.78   20.80
   0   2  -4  163.78   14.10
   0   2  -4  145.19   19.40
   0  -2   4  153.88   16.10
   0  -2   4  151.78   22.00
   0  -2   4  176.18   16.40
   0  -2   4  163.58   19.90
   0  -2   4  157.48   23.10
   0  -2   4  197.68   23.30
  -1   2  -4    6.90   10.90
  -1   2  -4   -1.20    7.40
  -1   2  -4   14.80   12.10
  -1   2  -4    9.20   10.40
  -1   2  -4   13.10    4.60
  -1   2  -4    4.10    3.40
   1  -2   4   -9.00   16.70
   1  -2   4   -1.60    6.00
   1  -2   4   13.90    6.50
   1  -2   4   23.60   12.40
   1  -2   4   15.40    7.50
   1  -2   4   23.50   11.00
  -2   2  -4    9.20    9.30
  -2   2  -4    4.60   15.90
  -2   2  -4   17.40   15.40
   2  -2   4    4.50   14.10
   2  -2   4   -1.60   20.30
   2  -2   4    2.20   10.50
   2  -2   4   -1.20    6.90
   2  -2   4   10.80   10.10
   2  -2   4   -4.70    9.70
   2  -2   4   15.00   15.20
  -3   2  -4   19.30   19.40
  -3   2  -4  -10.80   11.70
   3  -2   4   -2.20   30.90
   3  -2   4   -6.60   10.10
   3  -2   4   16.00   23.20
   3  -2   4    7.40   19.90
   3  -2   4   12.10   13.00
   3  -2   4  -17.30   12.90
  -4   2  -4 1241.88   85.89
   4  -2   4 1056.39   86.19
   4  -2   4  961.20   82.89
   4  -2   4 1021.60   89.39
   4  -2   4 1166.48   74.79
  -5   2  -4  314.77   80.29
   5  -2   4  458.15   90.89
   5  -2   4  456.65   43.50
   5  -2   4  440.96   83.49
   5  -2   4  386.26   62.09
   5   1  -4  442.86   49.99
  -5  -1   4  433.76   79.19
   4   1  -4  161.88   28.40
   4   1  -4  254.17   25.70
  -4  -1   4  184.18   50.09
   3   1  -4  185.38   23.50
   3   1  -4  238.28   36.60
   3   1  -4  202.98   22.00
  -3  -1   4  174.58   33.90
  -3  -1   4  167.08   26.00
  -3  -1   4  159.68   41.10
  -3  -1   4  147.39   26.00
   2   1  -4  106.79   15.50
   2   1  -4  115.39   29.40
   2   1  -4  122.79   20.90
   2   1  -4  111.69   15.20
   2   1  -4  108.79   27.60
  -2  -1   4  116.99   31.90
  -2  -1   4   95.39   18.00
  -2  -1   4   87.69   20.80
  -2  -1   4   86.79   16.40
   1   1  -4   -1.60   14.90
   1   1  -4    3.20   18.50
   1   1  -4   15.10   11.40
   1   1  -4   -7.30    5.60
   1   1  -4    1.50    5.80
  -1  -1   4   14.50   11.80
  -1  -1   4   -8.00   17.50
  -1  -1   4    1.40    6.70
  -1  -1   4   -5.70   10.20
  -1  -1   4    6.20    8.10
   0   1  -4  -10.40    9.10
   0   1  -4   25.90   11.10
   0   1  -4    6.30    4.60
   0   1  -4    2.50    4.50
   0   1  -4   11.10   10.80
   0  -1   4    9.80    5.80
   0  -1   4   10.80   12.60
   0  -1   4   -0.30    8.20
   0  -1   4    8.30    9.80
   0  -1   4   -0.60   10.80
  -1   1  -4    7.20    6.30
  -1   1  -4    6.60   10.40
  -1   1  -4    4.10    4.50
  -1   1  -4    3.50    9.50
  -1   1  -4    9.50    5.90
  -1   1  -4    8.90    7.60
   1  -1   4   10.00    7.10
   1  -1   4    1.60    4.90
   1  -1   4    6.20    6.70
   1  -1   4    3.30    9.10
   1  -1   4    4.80   10.10
  -2   1  -4  -13.80   11.60
  -2   1  -4   -6.00    6.80
  -2   1  -4   26.30   14.10
  -2   1  -4    0.90    2.80
  -2   1  -4   -1.40    3.10
   2  -1   4    5.60   11.80
   2  -1   4   -7.20    8.30
   2  -1   4    4.40    3.90
   2  -1   4    9.00   10.50
   2  -1   4    0.30   14.60
   2  -1   4   -8.20    7.80
  -3   1  -4  344.37   35.00
  -3   1  -4  353.06   26.10
   3  -1   4  259.37   41.90
   3  -1   4  351.96   36.30
   3  -1   4  290.07   37.70
   3  -1   4  311.97   34.40
   3  -1   4  342.17   27.50
  -4   1  -4  -13.90   22.80
  -4   1  -4   27.70   13.80
   4  -1   4   19.00   14.10
   4  -1   4    3.20   33.40
   4  -1   4    8.20   24.90
   4  -1   4    7.90   30.70
  -5   1  -4  158.38   40.20
   5  -1   4  117.19   58.59
   5  -1   4  119.99   39.60
   5  -1   4  235.68   33.00
   5  -1   4  234.18   58.59
  -6   1  -4  187.68   58.79
   6  -1   4  181.98   38.60
   6  -1   4  156.38   57.09
   5   0  -4   60.69   27.20
   5   0  -4   20.00   25.00
  -5   0   4  120.59   62.59
   4   0  -4   39.20   18.00
  -4   0   4   58.89   40.70
  -4   0   4   73.49   26.00
   3   0  -4  349.47   45.40
   3   0  -4  358.56   31.60
   3   0  -4  374.06   31.70
   3   0  -4  355.46   63.39
  -3   0   4  312.97   54.69
  -3   0   4  336.87   34.50
  -3   0   4  325.97   42.00
  -3   0   4  352.36   33.00
   2   0  -4   80.19   14.10
   2   0  -4  106.59   21.20
   2   0  -4   87.49   27.90
   2   0  -4   47.30   26.60
   2   0  -4   63.49   11.90
  -2   0   4   88.09   20.00
  -2   0   4   83.19   15.30
  -2   0   4   63.09   28.70
  -2   0   4   95.09   17.60
   1   0  -4   51.49    9.30
   1   0  -4   44.40   14.20
   1   0  -4   48.50   21.60
   1   0  -4   33.20    8.90
   1   0  -4   64.79   17.30
  -1   0   4   47.50   10.50
  -1   0   4   35.90   12.50
  -1   0   4   55.09   10.80
  -1   0   4   35.70    8.80
   0   0  -4  283.27   21.30
   0   0  -4  272.77   27.70
   0   0  -4  289.57   24.70
   0   0  -4  262.07   20.70
   0   0  -4  280.37   23.00
   0   0  -4  277.87   26.20
   0   0   4  288.37   27.20
   0   0   4  292.57   22.70
   0   0   4  254.27   23.40
   0   0   4  294.57   28.30
   0   0   4  274.97   21.10
  -1   0  -4  117.29   15.60
  -1   0  -4  128.39   12.20
  -1   0  -4  147.39   17.60
  -1   0  -4  109.69   14.20
   1   0   4  120.39   10.60
   1   0   4  131.39   14.40
   1   0   4  107.29   15.50
   1   0   4  131.69   13.90
   1   0   4   88.99   18.20
   1   0   4  127.09   18.00
  -2   0  -4 1631.44  104.19
  -2   0  -4 1593.84   99.69
  -2   0  -4 1609.04   99.79
  -2   0  -4 1470.75  104.69
  -2   0  -4 1418.16   99.69
   2   0   4 1614.44  103.99
   2   0   4 1553.44  101.79
   2   0   4 1552.94   98.99
   2   0   4 1550.04  101.89
  -3   0  -4 2083.69  142.89
  -3   0  -4 2174.78  134.79
  -3   0  -4 2148.29  134.79
  -3   0  -4 2050.19  134.19
   3   0   4 2178.98  142.09
   3   0   4 2199.18  137.49
   3   0   4 1981.70  139.29
  -4   0  -4   -2.30    7.10
  -4   0  -4    3.80   24.20
  -4   0  -4    7.30    9.40
   4   0   4   48.60   31.80
   4   0   4    3.00   13.60
   4   0   4   -9.00   20.90
  -5   0  -4  -15.10   35.30
   5   0   4   -5.50   35.00
   5   0   4    8.90   20.00
   5   0   4 -115.49   57.19
  -6   0  -4  -12.60   53.59
   6   0   4  -26.50   39.90
   6   0   4  -15.10   44.20
   4  -1  -4  343.87   40.00
   4  -1  -4  488.75   64.09
   4  -1  -4  393.66   43.00
  -4   1   4  399.16   43.20
  -4   1   4  377.46   63.79
   3  -1  -4   -9.80   12.10
   3  -1  -4   -2.80   12.20
   3  -1  -4   28.30   23.70
   3  -1  -4  -28.60   32.50
  -3   1   4    9.20   30.50
  -3   1   4  -11.40   16.40
  -3   1   4  -23.40   15.10
   2  -1  -4  180.88   31.60
   2  -1  -4  172.28   23.30
   2  -1  -4  142.59   17.40
   2  -1  -4  108.69   17.30
   2  -1  -4  151.58   36.60
  -2   1   4  108.59   19.60
  -2   1   4  131.29   32.20
  -2   1   4  121.19   17.50
  -2   1   4  141.19   23.30
   1  -1  -4   79.09   18.20
   1  -1  -4   86.19   13.50
   1  -1  -4   72.19   13.00
   1  -1  -4   79.09   24.60
   1  -1  -4   88.59   11.80
  -1   1   4   68.19   12.40
  -1   1   4   72.69   18.20
  -1   1   4   86.39   13.50
  -1   1   4   96.49   15.20
   0  -1  -4 1652.13  110.59
   0  -1  -4 1674.33  112.79
   0  -1  -4 1706.83  111.19
   0  -1  -4 1828.72  115.69
   0  -1  -4 1779.52  114.39
   0  -1  -4 1750.72  110.49
   0   1   4 1774.82  110.89
   0   1   4 1769.72  111.69
   0   1   4 1689.33  113.09
   0   1   4 1683.33  114.69
   0   1   4 1665.13  115.59
  -1  -1  -4 9999.00  585.44
  -1  -1  -4 9707.33  581.64
  -1  -1  -4 9706.93  583.74
  -1  -1  -4 8083.89  584.84
  -1  -1  -4 9089.89  582.04
   1   1   4 9342.57  585.64
   1   1   4 9500.05  585.84
   1   1   4 9049.39  581.94
  -2  -1  -4  122.39   19.20
  -2  -1  -4  119.09   10.10
  -2  -1  -4  119.79   20.70
  -2  -1  -4  126.99   14.70
   2   1   4  119.09   19.10
   2   1   4   98.19   16.20
   2   1   4  127.89   18.30
   2   1   4  126.09   11.70
  -3  -1  -4  172.08   32.50
  -3  -1  -4  168.28   19.80
  -3  -1  -4  160.68   28.60
  -3  -1  -4  169.18   18.20
   3   1   4  200.98   22.10
   3   1   4  178.38   26.10
   3   1   4  200.78   29.00
  -4  -1  -4   35.80   15.30
  -4  -1  -4   24.30   27.20
  -4  -1  -4   25.40   11.20
   4   1   4   23.50   21.60
   4   1   4   20.60   15.10
   4   1   4   41.50   35.20
  -5  -1  -4   49.10   19.30
  -5  -1  -4  -10.90   36.90
  -5  -1  -4   49.50   15.50
   5   1   4   23.10   20.00
  -6  -1  -4   57.89   26.30
  -6  -1  -4   58.99   59.49
   6   1   4   54.29   45.60
   6   1   4   71.59   31.70
   4  -2  -4   97.59   40.80
   4  -2  -4   44.50   28.20
   4  -2  -4   10.10   21.70
  -4   2   4   92.49   28.00
  -4   2   4   47.30   39.00
   3  -2  -4   83.29   19.40
   3  -2  -4  108.89   24.60
   3  -2  -4  182.28   40.90
   3  -2  -4   85.29   18.50
  -3   2   4   84.89   30.60
  -3   2   4   84.09   20.60
  -3   2   4   84.69   20.00
   2  -2  -4  363.06   31.20
   2  -2  -4  315.47   44.80
   2  -2  -4  387.56   31.80
   2  -2  -4  349.27   55.89
   2  -2  -4  392.96   32.20
  -2   2   4  374.76   30.60
  -2   2   4  376.46   32.70
  -2   2   4  335.27   46.50
   1  -2  -4 2784.32  164.58
   1  -2  -4 2701.13  174.88
   1  -2  -4 2578.34  170.78
   1  -2  -4 2617.94  166.48
   1  -2  -4 2775.02  167.18
   1  -2  -4 2609.54  173.28
  -1   2   4 2242.48  169.28
  -1   2   4 2622.64  167.18
  -1   2   4 2572.04  166.08
  -1   2   4 2477.95  165.28
   0  -2  -4  339.37   27.20
   0  -2  -4  370.16   34.70
   0  -2  -4  330.77   32.50
   0  -2  -4  344.47   31.40
   0  -2  -4  340.47   25.10
   0   2   4  320.27   28.70
   0   2   4  304.77   30.00
   0   2   4  325.77   25.10
   0   2   4  275.07   31.90
   0   2   4  355.76   24.20
  -1  -2  -4   -2.80    9.00
  -1  -2  -4    6.50    8.50
  -1  -2  -4    0.30    5.20
  -1  -2  -4   -2.60   10.30
  -1  -2  -4   23.80   13.70
   1   2   4    8.10   12.80
   1   2   4   12.40   11.50
   1   2   4   -1.00    6.00
   1   2   4    6.30   10.40
  -2  -2  -4   10.40   11.60
  -2  -2  -4    3.40   14.20
  -2  -2  -4   24.60   10.00
  -2  -2  -4   20.20    6.00
   2   2   4   22.40   12.50
   2   2   4   25.20   11.80
   2   2   4   30.00   15.30
  -3  -2  -4   43.10   13.00
  -3  -2  -4    7.70   15.30
  -3  -2  -4   49.50   24.70
   3   2   4   20.00   25.20
   3   2   4    2.20   12.70
   3   2   4   20.70   15.10
  -4  -2  -4   87.39   18.20
  -4  -2  -4  173.18   29.90
  -4  -2  -4  148.89   38.70
   4   2   4  145.49   40.80
   4   2   4   99.29   27.40
   4   2   4   71.59   20.50
  -5  -2  -4   27.20   20.90
  -5  -2  -4   16.10   27.20
   5   2   4  -15.30   21.10
  -6  -2  -4  116.29   56.39
  -6  -2  -4   94.89   37.50
   6   2   4   93.39   32.40
   6   2   4   -0.80   42.30
   4  -3  -4   25.60   26.00
   3  -3  -4   92.29   21.20
   3  -3  -4  104.09   23.00
   3  -3  -4  152.68   23.60
   3  -3  -4   88.39   41.70
  -3   3   4  106.19   26.20
  -3   3   4  111.29   21.60
   2  -3  -4   44.70   24.80
   2  -3  -4    0.60   13.30
   2  -3  -4   11.60   38.20
   2  -3  -4  -22.20   13.20
   2  -3  -4   11.10   42.50
  -2   3   4    7.00   25.60
  -2   3   4   40.00   24.10
  -2   3   4    9.70   13.60
   1  -3  -4  383.86   45.90
   1  -3  -4  340.07   29.80
   1  -3  -4  323.87   44.70
   1  -3  -4  327.07   27.30
   1  -3  -4  332.57   36.50
  -1   3   4  294.97   29.80
  -1   3   4  288.47   26.90
  -1   3   4  275.27   31.70
   0  -3  -4   36.90   16.10
   0  -3  -4   49.30   14.70
   0  -3  -4   26.60   21.30
   0  -3  -4   33.80   22.00
   0  -3  -4   46.80   10.40
   0   3   4   38.90   14.30
   0   3   4   56.29   15.60
   0   3   4   34.80   10.00
  -1  -3  -4  291.37   29.20
  -1  -3  -4  278.17   27.90
  -1  -3  -4  278.47   22.00
  -1  -3  -4  276.07   29.40
  -1  -3  -4  271.17   27.50
   1   3   4  227.48   27.90
   1   3   4  251.47   30.00
   1   3   4  208.58   29.40
   1   3   4  282.37   27.70
  -2  -3  -4   65.79   15.40
  -2  -3  -4   63.79   11.00
  -2  -3  -4   66.19   19.60
  -2  -3  -4   75.89   19.30
   2   3   4   64.59   17.20
   2   3   4   84.29   18.20
   2   3   4   61.69   16.00
   2   3   4   91.99   25.00
  -3  -3  -4   77.99   16.10
  -3  -3  -4   40.20   27.10
  -3  -3  -4   62.69   22.20
  -3  -3  -4   90.89   14.20
   3   3   4    2.80   29.00
   3   3   4  104.59   21.80
   3   3   4   60.59   16.00
   3   3   4  105.19   20.40
  -4  -3  -4  559.44   41.40
  -4  -3  -4  580.84   57.49
  -4  -3  -4  587.04   48.30
   4   3   4  592.94   48.90
   4   3   4  561.74   52.29
  -5  -3  -4  107.89   38.00
   5   3   4   78.79   26.20
  -6  -3  -4  352.76   57.19
  -6  -3  -4  449.16   83.29
   6   3   4  258.67   55.39
   6   3   4  316.17   55.09
   3  -4  -4  537.15   46.30
   3  -4  -4  402.86   44.70
   2  -4  -4  604.14   45.30
   2  -4  -4  528.75   56.59
   2  -4  -4  561.94   78.99
  -2   4   4  464.55   43.40
  -2   4   4  418.46   47.70
   1  -4  -4  100.69   20.70
   1  -4  -4  116.09   26.60
   1  -4  -4  152.78   41.00
   1  -4  -4  118.79   36.70
   1  -4  -4   79.49   16.80
  -1   4   4  138.79   29.70
   0  -4  -4  447.96   45.90
   0  -4  -4  453.35   36.00
   0  -4  -4  454.95   50.19
   0  -4  -4  486.25   40.80
   0  -4  -4  519.55   43.20
   0   4   4  440.46   51.49
   0   4   4  343.27   42.50
   0   4   4  435.16   40.30
  -1  -4  -4  110.79   24.90
  -1  -4  -4  136.39   17.70
  -1  -4  -4   88.89   22.50
  -1  -4  -4   85.79   18.90
  -1  -4  -4  109.89   23.70
   1   4   4   71.29   21.80
   1   4   4   77.39   26.20
   1   4   4   85.49   26.40
   1   4   4  125.99   21.00
   1   4   4   83.39   16.10
  -2  -4  -4  443.26   42.00
  -2  -4  -4  516.35   37.00
  -2  -4  -4  530.85   47.90
  -2  -4  -4  512.65   44.10
   2   4   4  458.85   40.90
   2   4   4  499.05   45.10
   2   4   4  337.77   50.29
   2   4   4  475.65   41.50
   2   4   4  362.26   39.30
  -3  -4  -4   72.69   15.30
  -3  -4  -4   77.59   20.90
  -3  -4  -4   54.19   25.00
  -3  -4  -4   83.79   32.00
   3   4   4   93.89   22.70
   3   4   4   65.69   40.60
   3   4   4   45.40   19.00
   3   4   4   57.39   21.40
   3   4   4   95.19   24.70
  -4  -4  -4  592.64   60.29
   4   4   4  481.25   50.49
   4   4   4  499.35   48.50
   4   4   4  536.55   50.09
  -5  -4  -4  871.51   65.89
  -5  -4  -4 1087.19   91.19
   5   4   4  926.31   76.99
   5   4   4  939.91  107.99
   3  -5  -4   16.50   28.00
   3  -5  -4   17.60   29.60
   2  -5  -4   15.90   37.90
   2  -5  -4   66.99   24.20
   2  -5  -4   37.20   22.60
   1  -5  -4   68.49   20.70
   1  -5  -4   88.99   37.60
   1  -5  -4   -1.30   29.30
   1  -5  -4   29.80   22.40
  -1   5   4   37.90   22.70
  -1   5   4    7.70   23.70
   0  -5  -4  154.48   30.20
   0  -5  -4  174.48   25.30
   0  -5  -4  212.38   40.80
   0  -5  -4  170.78   33.50
   0  -5  -4  198.68   39.60
   0   5   4  169.98   29.60
   0   5   4  136.69   32.70
   0   5   4  168.98   41.60
  -1  -5  -4    9.40   24.70
  -1  -5  -4   -2.30   29.00
  -1  -5  -4   42.80   16.10
  -1  -5  -4   83.39   28.00
  -1  -5  -4   24.40   22.30
   1   5   4   41.30   18.00
   1   5   4    7.50   30.80
   1   5   4   42.50   22.10
   1   5   4   38.80   14.40
   1   5   4   32.10   29.60
  -2  -5  -4  134.59   26.20
  -2  -5  -4  170.38   30.00
  -2  -5  -4  100.19   31.40
  -2  -5  -4  171.98   24.90
   2   5   4  124.19   38.20
   2   5   4  121.99   25.40
   2   5   4  169.18   30.30
   2   5   4  154.78   34.20
   2   5   4  152.78   27.50
  -3  -5  -4  407.86   53.89
  -3  -5  -4  416.86   36.00
  -3  -5  -4  319.77   53.59
   3   5   4  245.18   48.40
   3   5   4  337.47   38.20
   3   5   4  393.46   39.70
   3   5   4  307.07   45.80
  -4  -5  -4   61.99   40.80
  -4  -5  -4   52.89   20.60
  -4  -5  -4  -11.80   23.30
   4   5   4   77.99   29.30
   4   5   4   35.60   23.70
   4   5   4   41.50   30.60
  -5  -5  -4  -27.00   48.90
   5   5   4   23.90   39.90
   5   5   4  -14.00   28.90
   5   5   4   15.70   39.70
   2  -6  -4  -10.90   27.50
   2  -6  -4   84.69   34.00
   1  -6  -4  175.58   54.99
   1  -6  -4  228.88   43.30
   1  -6  -4  206.48   36.60
   1  -6  -4  221.08   47.60
   0  -6  -4   56.89   34.10
   0  -6  -4   25.30   31.30
   0  -6  -4   78.89   34.30
   0   6   4    5.00   46.20
   0   6   4   33.20   21.00
   0   6   4   -8.10   43.20
  -1  -6  -4   45.00   35.30
  -1  -6  -4   65.79   30.10
  -1  -6  -4   45.60   20.00
   1   6   4  -31.70   34.00
   1   6   4   19.30   22.40
   1   6   4   -6.10   34.30
  -2  -6  -4   45.60   32.70
  -2  -6  -4   12.40   21.70
  -2  -6  -4   47.60   33.60
   2   6   4   52.39   29.60
   2   6   4   21.50   39.30
   2   6   4  100.99   43.50
   2   6   4   43.80   24.80
   2   6   4   20.80   23.70
  -3  -6  -4  290.37   36.60
  -3  -6  -4  138.39   38.90
  -3  -6  -4  243.48   50.19
   3   6   4  224.38   42.10
   3   6   4  220.58   45.30
   3   6   4  200.88   42.40
  -4  -6  -4   93.99   50.79
  -4  -6  -4  111.29   30.20
  -4  -6  -4  144.19   48.00
   4   6   4  122.79   35.30
   4   6   4  146.39   34.00
   4   6   4  170.18   44.10
   1  -7  -4  131.19   34.80
   0  -7  -4   22.90   57.19
   0  -7  -4  -12.10   22.60
   0   7   4  -98.99   56.79
  -1  -7  -4  764.62   78.79
  -1  -7  -4  582.14   55.19
   1   7   4  590.24   85.09
   1   7   4  514.65   89.69
   1   7   4  473.15   56.29
  -2  -7  -4   52.69   26.90
  -2  -7  -4  119.79   51.39
   2   7   4   49.80   34.10
   2   7   4   97.09   45.40
   2   7   4  -23.40   27.80
   2   7   4   47.20   77.79
  -3  -7  -4    2.00   27.70
  -3  -7  -4   13.50   47.90
   3   7   4  -39.30   34.20
   3   7   4   50.69   53.39
   3   7   4 -147.89   72.09
   3   7   4   21.70   40.40
   1   7  -5   12.90   31.90
   1   7  -5   91.49   51.49
  -1  -7   5   65.09   65.19
  -1  -7   5  -94.19   46.30
   0   7  -5    3.20   54.49
   0   7  -5   59.39   33.80
   0  -7   5   55.09   63.29
   0  -7   5   98.99   44.90
  -1   7  -5  460.15   83.89
   1  -7   5  481.55   67.49
   1  -7   5  257.57   66.19
   2   6  -5  254.97   37.20
   2   6  -5  222.38   40.10
   2   6  -5  157.98   63.09
   2   6  -5  197.38   46.80
  -2  -6   5  278.87   52.49
  -2  -6   5  177.28   63.89
   1   6  -5 1162.08   96.49
   1   6  -5 1162.98   77.79
   1   6  -5 1129.49   86.09
   1   6  -5 1095.49   84.09
  -1  -6   5 1113.19   97.49
  -1  -6   5 1109.29  110.19
   0   6  -5  398.66   43.90
   0   6  -5  348.77   62.69
   0  -6   5  366.16   72.69
   0  -6   5  387.86   64.29
   0  -6   5  472.75   53.39
  -1   6  -5  -17.20   22.80
  -1   6  -5   -7.60   39.10
   1  -6   5  -14.80   24.30
   1  -6   5  -86.79   43.40
   1  -6   5  -71.79   27.90
  -2   6  -5   85.39   61.19
  -2   6  -5   14.40   29.20
   2  -6   5   33.10   32.80
   2  -6   5  147.19   42.50
   2  -6   5   32.10   28.90
   3  -6   5   86.39   42.20
   3  -6   5  114.39   38.80
   3  -6   5   85.59   27.00
   3   5  -5  936.21   71.09
   3   5  -5  892.61   73.19
  -3  -5   5  950.50  109.99
  -3  -5   5  921.41   98.09
   2   5  -5  211.68   33.20
   2   5  -5  128.59   26.50
   2   5  -5  214.78   33.80
   2   5  -5  155.08   51.69
  -2  -5   5  126.99   40.70
  -2  -5   5  227.98   59.49
   1   5  -5   58.99   30.30
   1   5  -5   14.10   26.10
   1   5  -5   33.20   23.50
   1   5  -5    6.70   11.00
  -1  -5   5  -64.09   27.10
  -1  -5   5   19.40   43.10
   0   5  -5   58.59   23.00
   0   5  -5   82.59   30.40
   0  -5   5   38.80   38.90
   0  -5   5  118.49   29.10
   0  -5   5   45.40   18.20
  -1   5  -5  -38.00   21.10
  -1   5  -5  -20.80   32.20
   1  -5   5   29.50   23.40
   1  -5   5  -27.60   15.50
   1  -5   5   21.50   35.00
   1  -5   5    8.80   21.30
  -2   5  -5  165.78   41.00
  -2   5  -5   88.59   24.70
   2  -5   5  187.78   35.40
   2  -5   5  135.19   22.60
   2  -5   5  114.69   27.80
  -3   5  -5   -9.40   26.40
   3  -5   5   25.80   34.20
   3  -5   5    4.60   18.40
   3  -5   5  -10.80   25.70
   3  -5   5   30.60   29.10
   4  -5   5   46.60   33.70
   4  -5   5  101.89   49.30
   4  -5   5  187.48   31.30
   4   4  -5  264.77   48.40
   4   4  -5  293.47   42.40
  -4  -4   5  317.67   75.09
  -4  -4   5  293.97   62.49
   3   4  -5    2.10   22.10
   3   4  -5  -20.80   57.69
   3   4  -5   -3.50   19.00
  -3  -4   5  -17.50   49.99
  -3  -4   5   -5.90   38.40
   2   4  -5   76.49   21.20
   2   4  -5  -18.10   41.70
   2   4  -5   57.29   33.20
   2   4  -5   93.09   18.00
  -2  -4   5   64.19   31.00
  -2  -4   5  100.59   49.99
   1   4  -5  102.89   26.50
   1   4  -5   61.69   18.10
   1   4  -5   46.60   13.00
   1   4  -5   72.39   29.40
   1   4  -5   79.89   27.90
   1   4  -5   55.99   26.30
  -1  -4   5   54.89   17.90
  -1  -4   5   12.00   24.10
  -1  -4   5   24.20   17.80
  -1  -4   5  111.19   35.00
  -1  -4   5   93.89   37.20
   0   4  -5  185.68   25.20
   0   4  -5  204.48   18.30
   0   4  -5  275.07   32.80
   0   4  -5  197.68   26.20
   0   4  -5  184.88   31.30
   0   4  -5  192.68   25.80
   0  -4   5  243.68   42.70
   0  -4   5  223.58   25.50
   0  -4   5  233.18   43.00
   0  -4   5  202.98   26.50
   0  -4   5  278.17   33.60
  -1   4  -5  -29.40   15.30
  -1   4  -5   19.80   24.00
  -1   4  -5    3.30   24.00
   1  -4   5    4.50   19.00
   1  -4   5   17.80   16.70
   1  -4   5   26.80   12.90
   1  -4   5    5.20   17.70
   1  -4   5   14.50   20.40
  -2   4  -5  102.99   32.10
  -2   4  -5   96.69   21.40
   2  -4   5   65.19   26.90
   2  -4   5   61.09   18.40
   2  -4   5  117.49   26.30
   2  -4   5    5.20   44.90
   2  -4   5   80.39   21.90
  -3   4  -5   54.09   19.70
   3  -4   5   13.10   38.80
   3  -4   5    2.30   15.30
   3  -4   5   16.60   17.60
   3  -4   5   25.80   13.50
   3  -4   5    7.10   21.40
   3  -4   5    2.20   30.70
   4  -4   5  175.48   48.10
   4  -4   5  145.09   23.30
   4  -4   5  155.48   60.19
   4  -4   5  213.78   39.70
   4  -4   5  155.78   30.30
   4   3  -5  205.08   37.90
   4   3  -5  271.17   36.20
  -4  -3   5  152.08   68.89
  -4  -3   5  262.07   53.39
   3   3  -5  245.58   39.30
   3   3  -5  346.27   34.00
   3   3  -5  469.55   71.49
  -3  -3   5  208.28   74.09
  -3  -3   5  457.05   74.09
   2   3  -5  274.87   27.20
   2   3  -5  233.48   48.70
   2   3  -5  287.87   28.60
   2   3  -5  273.57   46.30
  -2  -3   5  225.48   49.10
  -2  -3   5  215.08   42.20
   1   3  -5   -8.90    9.30
   1   3  -5   46.20   22.10
   1   3  -5   25.70   23.60
   1   3  -5  -13.30   16.70
   1   3  -5   -3.70   12.80
  -1  -3   5  -10.80   23.40
  -1  -3   5    2.70   10.40
  -1  -3   5   15.20   30.50
  -1  -3   5   32.20   21.50
  -1  -3   5   -2.40   13.50
   0   3  -5    4.10   14.20
   0   3  -5  -15.60   13.50
   0   3  -5    7.80    7.30
   0   3  -5   -8.70   10.60
   0   3  -5   18.40   16.90
   0  -3   5    7.60   21.20
   0  -3   5   14.40   15.80
   0  -3   5   -8.70   10.10
   0  -3   5    3.90   11.70
   0  -3   5   22.90   18.50
  -1   3  -5  320.07   31.30
  -1   3  -5  365.26   35.00
  -1   3  -5  377.36   29.90
   1  -3   5  333.17   41.30
   1  -3   5  367.06   35.40
   1  -3   5  290.27   33.20
   1  -3   5  365.06   33.20
   1  -3   5  339.77   28.70
   1  -3   5  327.47   27.90
  -2   3  -5 1371.16   88.99
  -2   3  -5 1320.17   92.79
  -2   3  -5 1401.96   94.09
  -2   3  -5 1318.47   90.99
   2  -3   5 1275.27   89.09
   2  -3   5 1228.18   87.79
   2  -3   5 1279.17   89.79
   2  -3   5 1340.87   91.99
   2  -3   5 1304.77   91.79
   2  -3   5 1237.18   85.29
  -3   3  -5 1694.53  116.09
  -3   3  -5 1688.03  110.39
   3  -3   5 1515.65  123.29
   3  -3   5 1546.15  106.49
   3  -3   5 1652.33  107.69
   3  -3   5 1752.62  112.29
   3  -3   5 1610.44  110.39
   3  -3   5 1560.04  115.19
   3  -3   5 1682.93  115.99
  -4   3  -5   95.79   25.60
  -4   3  -5   30.20   37.70
   4  -3   5   58.79   28.50
   4  -3   5   18.70   34.50
   4  -3   5   54.29   45.60
   4  -3   5   88.99   26.90
   4  -3   5   66.69   18.50
  -5   3  -5   12.90   42.20
   5  -3   5   52.99   47.20
   5  -3   5   76.09   26.20
   4   2  -5  195.98   30.40
   4   2  -5  185.88   33.70
  -4  -2   5  104.59   44.60
  -4  -2   5   42.80   58.39
   3   2  -5  123.99   50.99
  -3  -2   5    3.90   30.40
  -3  -2   5   74.99   44.90
   2   2  -5   46.00   32.60
   2   2  -5    5.50   12.50
   2   2  -5   38.30   29.80
   2   2  -5  -31.20   21.20
   2   2  -5    1.60   10.80
  -2  -2   5   19.50   23.40
  -2  -2   5   15.60   16.60
  -2  -2   5   -6.20   35.70
  -2  -2   5    4.70   16.60
   1   2  -5  375.46   30.00
   1   2  -5  381.86   29.30
   1   2  -5  353.86   39.30
   1   2  -5  393.16   35.60
   1   2  -5  366.46   43.00
  -1  -2   5  328.17   30.00
  -1  -2   5  397.86   37.90
  -1  -2   5  366.86   31.60
  -1  -2   5  331.57   36.90
  -1  -2   5  375.86   45.40
   0   2  -5  140.09   17.20
   0   2  -5  164.98   24.20
   0   2  -5  129.19   21.50
   0   2  -5  149.29   14.80
   0   2  -5  151.18   22.90
   0  -2   5  110.29   16.70
   0  -2   5  164.68   27.30
   0  -2   5  126.49   23.30
   0  -2   5  169.08   18.30
   0  -2   5  181.08   23.00
   0  -2   5  136.29   25.70
  -1   2  -5 2097.29  132.09
  -1   2  -5 2066.59  130.89
  -1   2  -5 1868.31  127.69
  -1   2  -5 2273.07  134.89
  -1   2  -5 2144.99  131.49
  -1   2  -5 1961.50  128.69
   1  -2   5 1979.70  135.49
   1  -2   5 1902.91  132.29
   1  -2   5 2069.19  133.79
   1  -2   5 2076.69  129.79
   1  -2   5 1923.31  128.99
   1  -2   5 1867.01  132.89
  -2   2  -5   -1.40   11.00
  -2   2  -5   13.50   15.70
  -2   2  -5   -0.20   17.40
   2  -2   5  -31.10   24.20
   2  -2   5   -7.60    7.10
   2  -2   5   12.30   16.70
   2  -2   5   -5.30   11.40
   2  -2   5   -1.40   12.00
   2  -2   5   35.30   14.70
  -3   2  -5   34.40   15.00
  -3   2  -5   28.40   21.90
   3  -2   5   61.19   24.90
   3  -2   5   30.20   13.00
   3  -2   5   66.79   37.10
   3  -2   5   20.60   24.50
   3  -2   5   40.30   17.40
  -4   2  -5  293.87   45.20
  -4   2  -5  234.28   28.50
   4  -2   5  272.47   43.70
   4  -2   5  271.87   51.79
   4  -2   5  328.97   31.10
   4  -2   5  268.07   46.20
  -5   2  -5  129.49   42.40
   5  -2   5   71.19   25.60
   5  -2   5    9.10   58.49
   5  -2   5   81.59   42.50
   5  -2   5   -5.90   58.09
   4   1  -5   57.69   20.90
   4   1  -5   30.00   20.50
  -4  -1   5   89.99   56.09
   3   1  -5  307.87   28.80
   3   1  -5  318.97   49.30
   3   1  -5  211.28   29.30
  -3  -1   5  232.88   53.69
  -3  -1   5  292.67   47.80
   2   1  -5   48.10   13.60
   2   1  -5  -26.50   28.30
   2   1  -5   19.00   21.20
   2   1  -5   31.30   12.40
   2   1  -5   -6.20   34.80
  -2  -1   5   78.19   19.70
  -2  -1   5   46.20   21.60
  -2  -1   5   52.89   33.30
  -2  -1   5   59.39   16.80
  -2  -1   5   22.80   13.90
   1   1  -5   32.60    9.70
   1   1  -5   34.90   15.30
   1   1  -5   44.70   23.60
   1   1  -5  -24.50   19.20
   1   1  -5   10.60    8.30
  -1  -1   5   29.10   15.00
  -1  -1   5   15.40   15.80
  -1  -1   5   26.30   11.80
  -1  -1   5   43.80   11.30
   0   1  -5   81.69   17.80
   0   1  -5   47.00    9.20
   0   1  -5   74.49   17.80
   0   1  -5   34.60    7.70
   0   1  -5   41.40   13.70
   0  -1   5   45.80   15.80
   0  -1   5   59.39   19.70
   0  -1   5   39.50    9.80
   0  -1   5   50.09   18.10
   0  -1   5   48.70   12.90
   0  -1   5   36.10   10.70
  -1   1  -5   -4.20    7.50
  -1   1  -5   12.70   14.80
  -1   1  -5   -4.90   11.40
  -1   1  -5    7.40    7.10
  -1   1  -5   -0.20    5.70
  -1   1  -5   -0.30    9.70
   1  -1   5   12.90   11.90
   1  -1   5   -3.40   16.80
   1  -1   5   -0.50    8.50
   1  -1   5   12.80   13.70
   1  -1   5    3.20    6.10
   1  -1   5   -7.90    8.30
  -2   1  -5   20.10    6.30
  -2   1  -5   29.80   17.00
  -2   1  -5   11.30   15.90
  -2   1  -5   14.70    9.80
   2  -1   5   39.20   16.60
   2  -1   5   28.50   11.70
   2  -1   5    5.50    5.60
   2  -1   5   13.80   11.20
   2  -1   5    1.10   20.50
   2  -1   5   12.90   13.30
  -3   1  -5  151.48   18.30
  -3   1  -5  176.38   29.90
  -3   1  -5  187.68   34.60
   3  -1   5  146.59   23.00
   3  -1   5  201.98   28.10
   3  -1   5  107.79   35.10
   3  -1   5  195.18   30.70
   3  -1   5  170.48   22.50
  -4   1  -5   25.80   16.40
  -4   1  -5   17.50   27.80
   4  -1   5   76.19   29.70
   4  -1   5    8.10   27.60
   4  -1   5   39.20   31.00
   4  -1   5    8.90   16.50
  -5   1  -5   40.30   40.50
   5  -1   5 -117.69   55.99
   5  -1   5  -11.60   22.70
   5  -1   5   32.80   36.60
   5  -1   5  -27.00   46.10
  -6   1  -5   80.69   56.89
   6  -1   5   73.19   52.29
   6  -1   5   95.39   37.80
   4   0  -5   72.79   24.70
   4   0  -5   52.29   21.30
  -4   0   5  112.09   52.19
   3   0  -5  257.27   28.20
   3   0  -5  211.78   27.90
   3   0  -5  350.86   44.70
  -3   0   5  193.08   49.30
  -3   0   5  222.88   38.60
  -3   0   5  232.48   34.90
   2   0  -5   19.90   29.30
   2   0  -5    4.60   18.10
   2   0  -5   -6.90   39.30
   2   0  -5    9.70    9.50
   2   0  -5    7.30   10.20
  -2   0   5    7.20   16.80
  -2   0   5   -7.10   13.70
  -2   0   5    0.60   31.00
  -2   0   5   -1.80   11.40
   1   0  -5 1927.11  122.39
   1   0  -5 1844.32  121.19
   1   0  -5 2046.60  130.09
   1   0  -5 1919.31  121.09
   1   0  -5 1713.43  127.09
  -1   0   5 1841.22  123.19
  -1   0   5 1802.72  121.39
  -1   0   5 1799.02  119.99
  -1   0   5 1886.61  120.69
   0   0  -5  222.28   18.50
   0   0  -5  212.38   22.20
   0   0  -5  224.08   19.30
   0   0  -5  220.08   28.40
   0   0  -5  195.18   26.50
   0   0  -5  230.38   21.50
   0   0   5  227.48   21.60
   0   0   5  199.38   27.50
   0   0   5  205.68   19.60
   0   0   5  234.18   29.60
   0   0   5  230.78   21.80
   0   0   5  224.98   23.40
  -1   0  -5   10.20    6.90
  -1   0  -5   14.50   12.40
  -1   0  -5   11.50    5.20
  -1   0  -5   16.70   13.30
  -1   0  -5   16.70   13.20
   1   0   5    3.00   18.70
   1   0   5   10.70    8.70
   1   0   5   13.60   12.00
   1   0   5   10.40    6.00
   1   0   5  -10.60    9.60
   1   0   5   31.60   14.90
  -2   0  -5   63.09   11.10
  -2   0  -5   38.80    7.00
  -2   0  -5   57.79   18.30
  -2   0  -5   35.00   17.30
  -2   0  -5   37.50    8.90
   2   0   5   49.30   14.50
   2   0   5   42.50    6.30
   2   0   5   64.09   18.00
   2   0   5   43.50   12.80
   2   0   5   60.49   23.10
  -3   0  -5   19.50    8.40
  -3   0  -5   16.80   21.30
  -3   0  -5   28.20    8.40
  -3   0  -5   45.40   24.10
  -3   0  -5   23.60    9.30
   3   0   5   53.09   14.50
   3   0   5   31.10   14.30
   3   0   5   29.70   19.30
   3   0   5   24.90   17.70
  -4   0  -5   28.40   12.60
  -4   0  -5   17.30    9.40
  -4   0  -5    8.20    9.00
  -4   0  -5   22.20   29.80
   4   0   5   36.40   17.70
   4   0   5    4.90   32.30
   4   0   5   30.10   24.20
  -5   0  -5    5.80   54.29
   5   0   5   37.30   23.90
   5   0   5    5.20   61.69
   5   0   5   -3.80   33.10
  -6   0  -5  837.32   91.59
   6   0   5  825.92   87.79
   6   0   5  644.94   71.49
   4  -1  -5   71.49   57.49
   4  -1  -5  -18.30   21.70
   4  -1  -5    3.70   23.00
  -4   1   5    2.40   33.90
  -4   1   5   51.29   46.50
   3  -1  -5  918.51   67.49
   3  -1  -5  764.92   59.39
   3  -1  -5  792.82   59.49
  -3   1   5  796.62   62.59
  -3   1   5  692.63   78.89
   2  -1  -5  773.62   80.29
   2  -1  -5 1011.40   69.09
   2  -1  -5 1126.69   71.29
   2  -1  -5 1045.90   68.99
  -2   1   5 1013.10   69.79
  -2   1   5  966.90   68.19
  -2   1   5  985.70   71.89
  -2   1   5  863.51   83.29
   1  -1  -5  115.09   24.40
   1  -1  -5  130.79   16.70
   1  -1  -5  178.88   33.70
   1  -1  -5  115.59   17.00
  -1   1   5   99.99   23.30
  -1   1   5  126.79   20.70
  -1   1   5  140.39   16.90
  -1   1   5  103.09   19.70
   0  -1  -5  152.28   25.80
   0  -1  -5  123.59   16.10
   0  -1  -5  128.29   13.60
   0  -1  -5  130.59   23.60
   0   1   5  138.59   26.10
   0   1   5  139.09   24.60
   0   1   5  113.69   14.20
   0   1   5  121.09   15.70
   0   1   5  129.99   17.90
  -1  -1  -5   90.09   18.70
  -1  -1  -5   63.19   10.60
  -1  -1  -5   61.19    9.90
  -1  -1  -5   67.79   16.20
  -1  -1  -5   68.19   16.40
  -1  -1  -5   62.69   12.20
   1   1   5   60.69   13.10
   1   1   5   54.99    9.60
   1   1   5   64.99   18.20
   1   1   5   74.69   15.70
   1   1   5   48.90   13.30
  -2  -1  -5   45.50   11.10
  -2  -1  -5   38.10   16.80
  -2  -1  -5   53.09   12.40
  -2  -1  -5   -7.70   16.00
  -2  -1  -5   35.80    7.60
   2   1   5   58.39   16.70
   2   1   5   36.90   16.20
   2   1   5   38.70    7.10
   2   1   5   47.70   15.70
  -3  -1  -5   10.70   11.10
  -3  -1  -5    4.90   21.70
  -3  -1  -5   20.90    9.90
   3   1   5  -13.30   19.70
   3   1   5   24.90   14.50
   3   1   5   19.40   17.10
  -4  -1  -5  331.77   47.60
  -4  -1  -5  312.97   27.00
  -4  -1  -5  393.86   30.90
  -4  -1  -5  381.16   32.10
   4   1   5  357.66   43.50
   4   1   5  357.76   37.30
   4   1   5  376.96   57.69
  -5  -1  -5  630.14   45.80
  -5  -1  -5  654.23   48.20
  -5  -1  -5  651.83   77.49
   5   1   5  563.74   64.79
   5   1   5  489.15   54.29
  -6  -1  -5   39.30   60.69
   6   1   5   99.99   48.70
   6   1   5   31.60   35.00
   4  -2  -5   56.19   25.30
   4  -2  -5    2.50   21.60
  -4   2   5   72.29   48.40
   3  -2  -5   40.50   26.40
   3  -2  -5   68.79   21.50
   3  -2  -5   39.50   18.40
  -3   2   5   87.69   39.20
  -3   2   5   95.69   25.40
   2  -2  -5   19.40   13.10
   2  -2  -5   57.39   43.90
   2  -2  -5   31.20   14.80
   2  -2  -5  -10.80   27.00
  -2   2   5   22.40   18.10
  -2   2   5   27.30   32.10
  -2   2   5    5.70   14.10
  -2   2   5   19.50   16.70
   1  -2  -5   45.00   13.10
   1  -2  -5   28.70   21.90
   1  -2  -5   61.19   12.30
   1  -2  -5   46.30   12.40
   1  -2  -5   38.70   28.90
   1  -2  -5  139.89   34.80
  -1   2   5   49.50   20.10
  -1   2   5   33.20   11.30
  -1   2   5   31.30   15.00
  -1   2   5   48.40   13.30
   0  -2  -5  139.59   24.40
   0  -2  -5  120.39   15.60
   0  -2  -5  147.29   24.50
   0  -2  -5   97.09   18.30
   0  -2  -5  145.39   28.50
   0  -2  -5  112.29   17.50
   0   2   5  156.18   25.40
   0   2   5  133.89   21.70
   0   2   5   93.19   23.00
   0   2   5  152.68   15.80
   0   2   5  150.78   16.10
  -1  -2  -5   74.39   16.20
  -1  -2  -5   71.89   10.90
  -1  -2  -5  140.59   25.20
  -1  -2  -5   71.09   14.20
  -1  -2  -5   66.79   17.00
  -1  -2  -5   43.70   15.60
   1   2   5   72.39   12.30
   1   2   5   51.79   16.40
   1   2   5   68.09   12.10
   1   2   5   67.19   19.20
   1   2   5   89.69   17.90
  -2  -2  -5   23.30   18.30
  -2  -2  -5   -5.70   18.20
  -2  -2  -5    6.40   12.70
  -2  -2  -5   18.90   12.90
  -2  -2  -5   11.90    6.20
   2   2   5    5.60   14.60
   2   2   5  -18.30   16.10
   2   2   5    1.60   14.60
   2   2   5   21.40   12.70
  -3  -2  -5   29.00   23.00
  -3  -2  -5   34.50   27.30
  -3  -2  -5   46.70   13.90
  -3  -2  -5   44.30   16.60
  -3  -2  -5   38.00    8.00
   3   2   5   59.09   14.00
   3   2   5   54.29   19.60
   3   2   5   55.09   18.60
   3   2   5   55.29   25.40
  -4  -2  -5  359.86   51.29
  -4  -2  -5  465.25   41.50
  -4  -2  -5  428.36   37.30
   4   2   5  377.16   41.50
   4   2   5  460.75   46.10
  -5  -2  -5  278.67   40.80
  -5  -2  -5  253.27   56.39
   5   2   5  280.07   54.19
   5   2   5  190.38   43.20
  -6  -2  -5   28.60   35.00
  -6  -2  -5  -51.69   62.79
   6   2   5   30.80   43.70
   6   2   5   -4.70   33.40
   4  -3  -5  139.79   33.80
   4  -3  -5   70.39   28.10
   3  -3  -5   20.40   22.50
   3  -3  -5   60.59   21.40
  -3   3   5   -9.20   28.30
  -3   3   5   -8.90   35.60
   2  -3  -5  727.33   55.49
   2  -3  -5  640.64   84.79
   2  -3  -5  778.02   56.69
   2  -3  -5  740.43   72.49
  -2   3   5  776.92   58.79
  -2   3   5  689.33   69.69
   1  -3  -5  -25.20   32.80
   1  -3  -5   22.00   14.50
   1  -3  -5   48.80   24.90
   1  -3  -5   25.60   11.60
   1  -3  -5   -7.40   34.20
  -1   3   5    1.40   12.10
  -1   3   5   46.30   20.70
  -1   3   5   16.90   20.40
   0  -3  -5  113.39   21.70
   0  -3  -5  107.09   16.30
   0  -3  -5  105.99   29.00
   0  -3  -5  135.99   28.40
   0  -3  -5  132.69   24.80
   0   3   5   99.09   20.00
   0   3   5   89.49   12.60
   0   3   5  104.29   17.40
   0   3   5   91.49   22.90
  -1  -3  -5  387.76   34.30
  -1  -3  -5  376.66   29.40
  -1  -3  -5  390.06   36.80
  -1  -3  -5  418.36   39.40
  -1  -3  -5  305.07   45.80
   1   3   5  344.37   38.00
   1   3   5  393.06   37.10
   1   3   5  365.36   39.40
   1   3   5  340.17   37.00
  -2  -3  -5  585.84   47.10
  -2  -3  -5  537.55   46.40
  -2  -3  -5  584.64   49.99
  -2  -3  -5  589.54   39.80
   2   3   5  559.54   47.00
   2   3   5  486.25   50.99
   2   3   5  568.84   47.90
   2   3   5  534.45   46.90
  -3  -3  -5 2864.81  187.68
  -3  -3  -5 2570.54  181.18
  -3  -3  -5 3027.60  177.78
  -3  -3  -5 3094.99  185.18
   3   3   5 2425.76  182.58
   3   3   5 2836.72  181.08
   3   3   5 2718.23  183.28
  -4  -3  -5  112.29   29.90
  -4  -3  -5   36.20   22.60
  -4  -3  -5   85.39   13.50
   4   3   5  108.29   24.70
   4   3   5   86.39   27.30
   4   3   5   96.19   23.20
  -5  -3  -5    8.10   32.40
  -5  -3  -5   56.29   47.30
   5   3   5   38.30   27.30
   5   3   5   45.60   37.40
  -6  -3  -5    0.30   67.49
   3  -4  -5  112.49   29.00
   2  -4  -5   61.89   22.80
   2  -4  -5   53.09   26.10
  -2   4   5   13.80   33.00
  -2   4   5   42.50   33.10
   1  -4  -5  115.39   20.80
   1  -4  -5  296.07   62.59
   1  -4  -5  159.08   33.60
   1  -4  -5  220.18   28.50
   1  -4  -5  163.28   43.50
  -1   4   5  150.38   28.90
   0  -4  -5  583.24   43.10
   0  -4  -5  525.55   57.69
   0  -4  -5  650.63   52.99
   0  -4  -5  510.05   55.69
   0  -4  -5  490.25   46.00
   0   4   5  472.95   48.70
   0   4   5  555.24   49.80
  -1  -4  -5 2332.67  162.68
  -1  -4  -5 2514.25  164.08
  -1  -4  -5 2749.62  164.58
  -1  -4  -5 2660.53  159.98
  -1  -4  -5 2516.35  163.98
   1   4   5 2225.98  164.48
   1   4   5 2473.35  165.08
   1   4   5 2355.56  163.48
   1   4   5 2309.17  166.58
  -2  -4  -5  989.60   64.39
  -2  -4  -5  969.10   72.69
  -2  -4  -5  979.00   72.39
   2   4   5  916.31   69.79
   2   4   5  849.72   69.19
   2   4   5  839.52   72.09
   2   4   5  839.02   77.79
  -3  -4  -5   -7.00   18.00
  -3  -4  -5    4.00   12.70
  -3  -4  -5    5.30   26.30
  -3  -4  -5    6.20   33.00
   3   4   5    6.60   20.30
   3   4   5   37.60   19.90
   3   4   5   94.79   40.40
   3   4   5    2.10   23.00
  -4  -4  -5  125.39   36.20
  -4  -4  -5   61.29   16.60
   4   4   5   69.29   27.50
   4   4   5   28.30   25.00
  -5  -4  -5   21.80   18.70
  -5  -4  -5   48.10   43.90
   5   4   5   39.00   33.70
   5   4   5   36.00   28.20
   5   4   5   72.69   37.60
   2  -5  -5  102.09   31.20
   2  -5  -5   76.49   26.60
   1  -5  -5  350.86   42.80
   1  -5  -5  351.06   41.80
   1  -5  -5  403.46   71.89
  -1   5   5  308.87   48.40
   0  -5  -5   98.89   27.50
   0  -5  -5  119.29   32.60
   0  -5  -5  179.78   37.70
   0  -5  -5   82.49   20.20
   0  -5  -5  147.79   43.60
   0   5   5   90.19   34.00
   0   5   5   71.69   25.10
  -1  -5  -5   16.70   32.30
  -1  -5  -5  -11.20   32.30
  -1  -5  -5   23.30   15.80
  -1  -5  -5   -3.70   24.50
  -1  -5  -5   17.90   29.70
   1   5   5   16.60   33.80
   1   5   5   11.70   32.20
   1   5   5   -9.00   19.40
   1   5   5    7.50   14.80
   1   5   5   20.40   26.80
  -2  -5  -5   44.10   28.40
  -2  -5  -5  -25.30   28.90
  -2  -5  -5   24.10   16.70
   2   5   5   37.70   23.30
   2   5   5   40.00   40.50
   2   5   5   -1.80   25.10
   2   5   5  -13.70   23.70
   2   5   5   20.90   30.70
  -3  -5  -5  -57.09   40.50
  -3  -5  -5   18.30   18.20
  -3  -5  -5   31.10   34.80
   3   5   5   14.60   33.40
   3   5   5   11.60   31.20
   3   5   5  -14.50   24.90
   3   5   5   29.10   24.50
  -4  -5  -5   98.99   23.90
  -4  -5  -5   78.49   42.20
   4   5   5  126.89   36.00
   4   5   5   68.09   31.50
  -5  -5  -5  108.69   56.69
  -5  -5  -5   57.69   27.30
   5   5   5    5.00   40.70
   5   5   5  -45.00   46.60
   5   5   5  -46.80   29.60
   2  -6  -5   -4.70   34.50
   2  -6  -5  -31.90   29.50
   1  -6  -5   50.19   36.50
   1  -6  -5   34.40   27.50
  -1   6   5    4.70   43.70
   0  -6  -5   83.59   25.10
   0  -6  -5   45.70   44.10
   0  -6  -5  130.69   36.40
   0   6   5   62.69   42.80
   0   6   5  101.69   28.50
  -1  -6  -5   -6.60   32.30
  -1  -6  -5  -29.10   31.50
  -1  -6  -5   -1.40   38.60
   1   6   5  -30.00   45.60
   1   6   5    1.60   24.50
   1   6   5  -46.90   41.20
  -2  -6  -5  420.76   57.39
  -2  -6  -5  506.75   64.99
  -2  -6  -5  497.35   44.60
   2   6   5  457.35   48.80
   2   6   5  409.56   55.49
   2   6   5  336.37   47.70
   2   6   5  285.47   64.89
  -3  -6  -5  208.38   53.69
  -3  -6  -5  161.38   29.50
  -3  -6  -5  203.88   51.69
   3   6   5  194.48   49.30
   3   6   5  150.68   36.00
   3   6   5   84.99   35.50
   3   6   5   60.39   40.80
  -4  -6  -5  374.36   45.60
  -4  -6  -5  306.27   62.09
   4   6   5  240.48   46.00
   4   6   5  211.98   42.50
   0  -7  -5  159.88   36.80
   0  -7  -5  203.28   49.50
  -1  -7  -5  -22.20   42.70
   1   7   5  -50.59   57.99
   1   7   5   53.69   35.50
  -2  -7  -5  239.08   43.50
  -2  -7  -5  113.79   50.09
   2   7   5  219.38   59.29
   2   7   5  150.38   56.99
  -3  -7  -5   99.29   33.10
  -3  -7  -5  107.39   58.39
   3   7   5  113.99   48.20
   3   7   5  115.69   59.09
   3   7   5   44.40   39.30
   2   6  -6   38.00   44.70
   2   6  -6   -3.80   27.80
  -2  -6   6   23.10   70.19
  -2  -6   6   50.59   55.09
   1   6  -6  106.19   22.10
   1   6  -6  115.79   45.80
   1   6  -6   94.39   37.40
  -1  -6   6   15.40   62.49
  -1  -6   6  102.89   44.50
   0   6  -6   72.99   68.49
   0   6  -6   86.49   27.40
   0  -6   6   30.70   39.40
   0  -6   6   25.80   55.89
  -1   6  -6  148.79   35.50
  -1   6  -6  258.87   54.19
   1  -6   6   84.99   57.69
   1  -6   6  158.68   39.60
   1  -6   6  215.58   35.90
  -2   6  -6  147.69   33.30
  -2   6  -6  257.87   99.09
   2  -6   6  161.58   41.80
   2  -6   6  124.39   56.49
   2  -6   6  119.09   36.50
   3   5  -6  120.89   40.40
  -3  -5   6  115.29   74.89
  -3  -5   6   94.29   58.69
   2   5  -6    6.90   48.20
   2   5  -6   70.29   30.80
   2   5  -6   48.30   21.00
  -2  -5   6  -35.40   59.09
  -2  -5   6   98.29   44.70
   1   5  -6  106.49   31.40
   1   5  -6  139.59   37.70
   1   5  -6  118.29   36.00
   1   5  -6  111.79   22.20
   1   5  -6  144.49   37.20
  -1  -5   6  119.69   39.30
  -1  -5   6   22.20   53.89
   0   5  -6   28.00   16.80
   0   5  -6   37.60   23.70
   0   5  -6   -4.50   31.20
   0   5  -6   35.10   11.40
   0   5  -6   -5.00   25.00
   0  -5   6   63.79   32.50
   0  -5   6   20.40   26.70
   0  -5   6   64.79   47.70
  -1   5  -6   66.09   29.60
  -1   5  -6   61.59   37.40
   1  -5   6    9.60   29.20
   1  -5   6   40.60   37.90
   1  -5   6   -6.30   21.70
   1  -5   6   23.20   24.80
  -2   5  -6    5.30   18.10
  -2   5  -6   81.99   41.90
   2  -5   6  -21.10   20.90
   2  -5   6   56.99   28.40
   2  -5   6  -22.30   33.50
  -3   5  -6  139.59   33.70
   3  -5   6  131.89   43.10
   3  -5   6   81.19   30.70
   3  -5   6  122.89   32.70
   4  -5   6  -20.00   35.30
   3   4  -6   63.09   23.80
   3   4  -6   11.90   29.10
  -3  -4   6  -15.30   43.40
  -3  -4   6   37.90   62.59
   2   4  -6  -84.79   41.40
   2   4  -6   15.90   17.00
   2   4  -6  -17.50   20.70
  -2  -4   6  -21.00   33.80
  -2  -4   6   29.80   51.09
   1   4  -6  261.47   38.70
   1   4  -6  267.97   27.70
   1   4  -6  297.67   50.39
   1   4  -6  348.17   33.50
  -1  -4   6  251.87   41.80
  -1  -4   6  263.37   52.19
  -1  -4   6  360.26   67.29
   0   4  -6  308.87   33.00
   0   4  -6  294.07   25.50
   0   4  -6  378.16   40.10
   0   4  -6  323.97   36.60
   0  -4   6  372.16   55.19
   0  -4   6  247.28   34.60
   0  -4   6  347.07   35.70
   0  -4   6  277.27   41.00
   0  -4   6  315.67   51.79
  -1   4  -6 1102.39   74.49
  -1   4  -6  985.60   72.99
  -1   4  -6 1042.90   79.99
   1  -4   6  880.51   77.99
   1  -4   6  991.90   70.89
   1  -4   6 1013.20   77.19
   1  -4   6 1049.09   72.29
  -2   4  -6  776.02   66.99
  -2   4  -6  705.63   57.49
   2  -4   6  724.93   59.39
   2  -4   6  643.74   52.29
   2  -4   6  745.03   53.79
   2  -4   6  786.52   62.39
   2  -4   6  617.74   58.19
  -3   4  -6    8.90   18.60
   3  -4   6  -25.00   17.30
   3  -4   6   37.60   31.80
   3  -4   6    6.50   22.20
   3  -4   6  -49.30   20.60
   3  -4   6   65.19   39.10
   3  -4   6   34.90   24.30
   4  -4   6   22.70   30.10
   4  -4   6   39.20   48.10
   4  -4   6   14.90   25.30
   3   3  -6  195.58   32.00
   3   3  -6  237.48   31.90
  -3  -3   6  142.79   44.80
  -3  -3   6  113.99   60.69
   2   3  -6   46.30   19.10
   2   3  -6    6.90   40.70
   2   3  -6   24.20   16.30
  -2  -3   6   67.49   31.80
  -2  -3   6   50.19   40.20
  -2  -3   6  -19.10   45.10
   1   3  -6 2481.85  155.58
   1   3  -6 2623.54  160.88
   1   3  -6 2441.06  156.88
   1   3  -6 2355.36  164.68
  -1  -3   6 2247.88  156.88
  -1  -3   6 2357.76  157.98
  -1  -3   6 2298.97  173.48
  -1  -3   6 2263.27  163.08
  -1  -3   6 2500.75  163.88
   0   3  -6 1212.68   78.19
   0   3  -6 1034.40   75.29
   0   3  -6 1086.19   72.09
   0   3  -6 1068.59   77.29
   0   3  -6 1207.78   78.29
   0  -3   6 1037.40   83.69
   0  -3   6  922.91   81.39
   0  -3   6 1080.19   75.59
   0  -3   6 1045.70   80.19
   0  -3   6 1104.79   74.69
  -1   3  -6  -11.40   18.30
  -1   3  -6   12.60   18.50
  -1   3  -6   15.40    8.90
  -1   3  -6   26.40   14.80
   1  -3   6    7.90   16.60
   1  -3   6  -20.50   18.90
   1  -3   6   12.70   13.20
   1  -3   6   18.00   14.10
   1  -3   6   -4.50   21.90
   1  -3   6   14.50   30.70
  -2   3  -6   23.50   23.20
  -2   3  -6   23.40   16.00
  -2   3  -6   20.60   24.10
   2  -3   6   54.39   16.30
   2  -3   6    3.00   14.80
   2  -3   6    8.80   12.10
   2  -3   6   45.60   24.20
   2  -3   6   -4.90   17.40
  -3   3  -6   -8.50   21.10
  -3   3  -6   -5.30   28.70
   3  -3   6   12.70   18.70
   3  -3   6   22.60   20.10
   3  -3   6   -6.30   27.70
   3  -3   6    7.20   28.10
   3  -3   6   -6.10   17.50
   3  -3   6   24.30   12.20
  -4   3  -6  163.58   30.80
  -4   3  -6  314.07   51.29
   4  -3   6  228.38   41.70
   4  -3   6  277.47   60.49
   4  -3   6  215.18   34.90
   4  -3   6  164.38   34.70
   4  -3   6  195.28   48.20
  -5   3  -6   28.60   47.50
   5  -3   6   17.40   33.70
   5  -3   6   66.49   53.79
   5  -3   6  -15.50   29.00
   4   2  -6    5.00   26.20
   4   2  -6   15.70   27.80
  -4  -2   6   44.70   49.00
  -4  -2   6   41.00   68.19
   3   2  -6  349.07   37.00
   3   2  -6  328.37   35.60
  -3  -2   6  373.86   69.09
  -3  -2   6  439.06   56.49
  -3  -2   6  278.47   50.99
   2   2  -6 1036.50   86.49
   2   2  -6  879.11   65.09
   2   2  -6  877.51   65.09
  -2  -2   6  906.51   91.89
  -2  -2   6  868.61   75.59
  -2  -2   6  939.41   72.99
   1   2  -6   59.39   20.70
   1   2  -6  116.39   30.50
   1   2  -6   80.39   31.60
   1   2  -6  100.69   18.90
   1   2  -6   73.39   14.70
  -1  -2   6  130.59   27.30
  -1  -2   6   83.89   24.80
  -1  -2   6   75.09   31.60
  -1  -2   6   75.89   18.90
  -1  -2   6   69.79   15.70
   0   2  -6   74.99   20.10
   0   2  -6   62.09   14.80
   0   2  -6   64.59   20.10
   0   2  -6   59.09   11.60
   0   2  -6   73.99   20.40
   0  -2   6   77.89   25.40
   0  -2   6   58.79   17.80
   0  -2   6   47.10   22.80
   0  -2   6   69.79   14.40
   0  -2   6   68.49   25.50
   0  -2   6   53.09   15.10
  -1   2  -6  101.59   21.90
  -1   2  -6   64.49   15.20
  -1   2  -6   98.49   19.90
  -1   2  -6   68.59   14.30
  -1   2  -6   54.39    9.60
   1  -2   6   40.70   14.70
   1  -2   6   61.09   12.40
   1  -2   6   48.40   15.20
   1  -2   6   90.79   24.20
   1  -2   6   76.79   21.10
   1  -2   6   94.99   26.90
  -2   2  -6  274.77   35.40
  -2   2  -6  301.97   35.80
  -2   2  -6  306.07   31.50
   2  -2   6  344.37   32.20
   2  -2   6  266.77   24.50
   2  -2   6  320.97   32.80
   2  -2   6  318.77   28.80
   2  -2   6  263.27   45.50
   2  -2   6  303.17   37.80
  -3   2  -6   -6.90   23.60
  -3   2  -6   22.60   15.40
  -3   2  -6  -10.70   28.30
   3  -2   6    8.00   19.60
   3  -2   6    7.50   25.10
   3  -2   6   28.60   18.50
   3  -2   6  -25.30   18.80
   3  -2   6  -27.80   17.60
  -4   2  -6  -10.00   35.30
  -4   2  -6  -15.20   20.90
   4  -2   6   57.49   30.50
   4  -2   6  -10.90   18.90
   4  -2   6   52.09   34.20
   4  -2   6   22.10   34.10
  -5   2  -6   33.40   45.10
   5  -2   6   29.50   43.90
   5  -2   6   57.59   28.80
   4   1  -6   54.59   24.80
   4   1  -6   15.00   25.60
  -4  -1   6  129.79   47.20
  -4  -1   6  119.89   63.79
   3   1  -6  151.88   27.20
   3   1  -6  144.49   28.40
   3   1  -6  134.59   25.10
  -3  -1   6  127.09   38.70
   2   1  -6  227.18   39.80
   2   1  -6  200.48   24.80
   2   1  -6  282.07   50.79
   2   1  -6  192.78   24.50
  -2  -1   6  187.78   30.50
  -2  -1   6  164.58   31.60
  -2  -1   6  210.58   51.39
  -2  -1   6  175.88   28.20
   1   1  -6  166.28   19.60
   1   1  -6  176.68   34.30
   1   1  -6  152.88   20.00
   1   1  -6  158.78   32.40
   1   1  -6  184.28   28.80
  -1  -1   6  163.88   29.00
  -1  -1   6  154.08   22.40
  -1  -1   6  145.89   32.30
  -1  -1   6  121.29   24.30
   0   1  -6  629.74   50.29
   0   1  -6  565.14   49.90
   0   1  -6  580.74   42.20
   0   1  -6  622.44   46.90
   0   1  -6  582.14   42.30
   0  -1   6  671.73   45.60
   0  -1   6  567.44   48.50
   0  -1   6  546.05   46.60
   0  -1   6  635.64   43.00
   0  -1   6  586.84   54.79
   0  -1   6  498.55   51.19
  -1   1  -6   11.60    8.70
  -1   1  -6    9.00   14.00
  -1   1  -6   -1.30   14.30
  -1   1  -6   -1.90    6.90
  -1   1  -6  -22.70   17.30
  -1   1  -6   13.90    9.10
   1  -1   6    1.50   22.00
   1  -1   6    0.00   10.70
   1  -1   6   -1.80    8.30
   1  -1   6    6.40   15.00
   1  -1   6   -7.30   18.70
   1  -1   6    4.60   12.20
  -2   1  -6   23.10   18.00
  -2   1  -6   26.50   13.50
  -2   1  -6   34.80    9.80
  -2   1  -6   55.99   20.80
  -2   1  -6    9.90    6.80
   2  -1   6  -17.60   21.00
   2  -1   6   22.20    7.60
   2  -1   6   37.70   16.00
   2  -1   6   32.80   15.30
   2  -1   6   28.90   14.60
   2  -1   6   15.10   18.20
  -3   1  -6  722.63   49.30
  -3   1  -6  722.73   61.79
  -3   1  -6  660.63   58.39
   3  -1   6  662.93   46.80
   3  -1   6  709.93   53.99
   3  -1   6  568.74   53.19
   3  -1   6  670.13   58.59
  -4   1  -6  401.96   52.19
  -4   1  -6  494.15   37.70
   4  -1   6  476.75   44.40
   4  -1   6  410.36   53.49
   4  -1   6  395.66   49.10
   4  -1   6  437.96   52.79
  -5   1  -6  645.44   71.39
  -5   1  -6  536.25   48.70
   5  -1   6  521.15   98.79
   5  -1   6  584.34   72.09
   5  -1   6  680.83   58.99
   4   0  -6  640.14   60.19
   4   0  -6  768.32   59.69
  -4   0   6  483.75   97.29
   3   0  -6   65.79   20.80
   3   0  -6   54.59   19.70
   3   0  -6   77.69   38.10
  -3   0   6   48.80   34.20
  -3   0   6   59.89   49.40
   2   0  -6  828.22   59.79
   2   0  -6  927.41   66.69
   2   0  -6  863.51   60.29
   2   0  -6  602.84   86.39
  -2   0   6  846.42   62.99
  -2   0   6  748.63   83.59
  -2   0   6  810.02   65.39
   1   0  -6  -23.40   27.80
   1   0  -6   -2.30    9.50
   1   0  -6  -39.00   24.40
   1   0  -6    3.10   10.60
   1   0  -6   -5.50   15.70
  -1   0   6   25.70   15.70
  -1   0   6  -25.20   15.90
  -1   0   6   25.50   11.30
  -1   0   6   -0.80   16.50
   0   0  -6    6.40   17.10
   0   0  -6   17.60    8.80
   0   0  -6   12.30   19.20
   0   0  -6    7.20    9.80
   0   0  -6   -5.70   12.80
   0   0   6    1.10   11.70
   0   0   6    0.50   12.90
   0   0   6   27.60   17.20
   0   0   6   12.70   23.30
   0   0   6    0.70   18.10
   0   0   6   14.60    9.60
  -1   0  -6  650.83   45.00
  -1   0  -6  705.13   49.70
  -1   0  -6  717.13   50.19
  -1   0  -6  633.84   43.60
  -1   0  -6  657.53   51.29
   1   0   6  589.04   47.10
   1   0   6  644.84   53.39
   1   0   6  584.54   51.79
   1   0   6  616.94   43.80
   1   0   6  585.64   50.89
   1   0   6  627.84   47.20
  -2   0  -6  309.77   33.90
  -2   0  -6  315.77   23.30
  -2   0  -6  341.77   35.50
  -2   0  -6  314.57   25.30
  -2   0  -6  334.57   27.90
   2   0   6  323.97   30.50
   2   0   6  303.17   23.10
   2   0   6  356.16   36.30
   2   0   6  304.07   31.20
   2   0   6  235.48   38.60
   2   0   6  273.07   33.30
  -3   0  -6 2417.16  150.18
  -3   0  -6 2349.86  148.69
  -3   0  -6 2374.76  158.38
  -3   0  -6 2396.76  157.98
   3   0   6 2201.58  154.18
   3   0   6 2273.77  154.58
   3   0   6 2276.97  156.78
  -4   0  -6  185.18   40.80
  -4   0  -6  163.28   17.40
  -4   0  -6  122.39   17.40
  -4   0  -6  210.58   22.10
   4   0   6  145.19   37.40
   4   0   6  196.88   38.70
   4   0   6  241.58   32.80
   4   0   6  161.88   34.50
  -5   0  -6   91.89   44.40
   5   0   6   16.00   42.20
   5   0   6   64.59   38.60
   5   0   6   -0.10   26.50
  -6   0  -6   -5.60   57.79
   6   0   6   93.79   57.09
   6   0   6   86.39   40.80
   4  -1  -6  -20.90   26.20
   4  -1  -6   45.60   26.90
  -4   1   6   98.19   71.89
   3  -1  -6   86.79   33.30
   3  -1  -6   22.80   18.60
   3  -1  -6   32.90   19.00
  -3   1   6    5.40   34.10
  -3   1   6   -6.60   48.00
  -3   1   6   97.39   31.60
   2  -1  -6   18.40   14.20
   2  -1  -6    6.50   20.00
   2  -1  -6    3.90   15.10
  -2   1   6   19.70   21.80
  -2   1   6   16.90   38.60
  -2   1   6   56.19   21.90
   1  -1  -6  502.65   38.80
   1  -1  -6  500.25   38.10
   1  -1  -6  514.85   40.20
  -1   1   6  534.75   41.60
  -1   1   6  479.65   41.30
  -1   1   6  430.36   37.50
  -1   1   6  370.76   48.30
   0  -1  -6    9.50   11.20
   0  -1  -6    6.40   19.80
   0  -1  -6    5.30   13.30
   0  -1  -6  -15.70   21.40
   0  -1  -6   11.80    9.60
   0  -1  -6   -8.30   18.80
   0   1   6   10.00   16.80
   0   1   6    1.20   14.50
   0   1   6    0.00    9.80
   0   1   6   19.60   10.50
   0   1   6   19.30   20.10
  -1  -1  -6  146.29   17.20
  -1  -1  -6  173.18   16.30
  -1  -1  -6  172.58   20.00
  -1  -1  -6  126.59   25.70
  -1  -1  -6  176.88   23.30
  -1  -1  -6  150.88   27.20
   1   1   6  167.48   20.50
   1   1   6  149.88   29.70
   1   1   6  154.98   27.90
   1   1   6  143.59   21.60
   1   1   6  179.38   16.90
  -2  -1  -6  202.98   25.80
  -2  -1  -6  235.88   31.20
  -2  -1  -6  217.18   22.10
  -2  -1  -6  221.38   18.10
  -2  -1  -6  190.38   32.50
   2   1   6  224.68   18.80
   2   1   6  270.27   31.60
   2   1   6  150.28   29.00
   2   1   6  216.18   29.90
  -3  -1  -6   98.19   29.20
  -3  -1  -6  141.09   20.30
  -3  -1  -6  171.28   21.20
   3   1   6  185.08   28.30
   3   1   6  123.69   26.20
   3   1   6  153.98   28.30
  -4  -1  -6   32.20   13.10
  -4  -1  -6   32.70   15.40
  -4  -1  -6   32.90   32.40
  -4  -1  -6    9.60   15.30
   4   1   6   25.60   20.80
   4   1   6   -8.90   37.80
   4   1   6   51.39   30.20
  -5  -1  -6  319.77   31.50
  -5  -1  -6  300.27   32.60
  -5  -1  -6  286.17   61.09
   5   1   6  230.48   45.30
   5   1   6  178.98   42.10
  -6  -1  -6  110.09   64.79
   6   1   6   38.20   51.69
   6   1   6  176.38   42.00
   3  -2  -6  126.79   26.60
   3  -2  -6  169.58   32.40
   3  -2  -6  191.78   28.80
  -3   2   6  138.19   37.40
  -3   2   6  120.19   51.79
   2  -2  -6   35.10   17.80
   2  -2  -6   16.60   48.20
   2  -2  -6  105.59   19.50
   2  -2  -6   58.19   19.30
  -2   2   6   64.29   24.00
  -2   2   6  111.09   26.30
  -2   2   6   78.49   42.90
   1  -2  -6  226.88   49.60
   1  -2  -6  254.37   28.40
   1  -2  -6  259.67   25.80
   1  -2  -6  282.67   44.20
   1  -2  -6  257.07   38.30
  -1   2   6  250.97   40.10
  -1   2   6  255.27   28.30
  -1   2   6  274.07   32.50
   0  -2  -6   17.70   14.60
   0  -2  -6   75.59   24.50
   0  -2  -6   35.80   13.50
   0  -2  -6    7.00   24.80
   0  -2  -6   42.40   22.40
   0  -2  -6   43.30   11.80
   0   2   6   30.40   11.30
   0   2   6   44.40   12.70
   0   2   6   40.80   17.80
   0   2   6    5.30   24.70
   0   2   6   12.70   19.80
  -1  -2  -6  209.38   29.30
  -1  -2  -6  195.88   23.80
  -1  -2  -6  190.18   26.60
  -1  -2  -6  191.28   19.50
  -1  -2  -6  216.58   23.70
  -1  -2  -6  269.97   34.90
   1   2   6  214.78   20.30
   1   2   6  176.68   32.90
   1   2   6  164.38   29.30
   1   2   6  204.18   21.90
   1   2   6  216.58   30.60
  -2  -2  -6    7.80   12.80
  -2  -2  -6    4.80   20.80
  -2  -2  -6   27.10   24.60
  -2  -2  -6    0.70   15.00
  -2  -2  -6    8.40    7.80
   2   2   6  -22.30   18.00
   2   2   6   28.00   18.90
   2   2   6   27.30   19.50
  -3  -2  -6   66.79   18.50
  -3  -2  -6   41.00   17.30
  -3  -2  -6   62.29   10.10
  -3  -2  -6   68.39   28.60
  -3  -2  -6   78.79   29.00
   3   2   6   47.90   17.60
   3   2   6   29.40   22.90
   3   2   6   74.39   29.80
   3   2   6   51.69   23.30
  -4  -2  -6  107.69   38.10
  -4  -2  -6   95.39   23.70
  -4  -2  -6  104.99   22.70
   4   2   6  108.69   23.60
   4   2   6  108.59   29.90
   4   2   6  143.19   28.80
  -5  -2  -6   30.30   26.80
  -5  -2  -6   83.09   47.90
  -5  -2  -6   52.49   27.10
   5   2   6   81.79   29.20
   5   2   6   27.40   36.50
  -6  -2  -6   31.40   69.79
   6   2   6   39.00   39.20
   6   2   6   72.59   53.49
   3  -3  -6  218.68   38.50
   3  -3  -6  244.28   40.00
  -3   3   6  214.68   53.69
   2  -3  -6   26.50   20.50
   2  -3  -6   12.00   18.00
  -2   3   6   -1.40   29.30
  -2   3   6   18.00   42.50
   1  -3  -6  502.45   65.99
   1  -3  -6  571.94   68.49
   1  -3  -6  536.95   44.80
   1  -3  -6  536.65   42.10
   1  -3  -6  516.25   58.99
  -1   3   6  484.45   42.50
  -1   3   6  519.35   49.40
  -1   3   6  462.95   51.49
   0  -3  -6 1245.88   81.89
   0  -3  -6 1218.98   92.99
   0  -3  -6 1224.68   91.69
   0  -3  -6 1262.47   84.69
   0  -3  -6 1057.09   89.09
   0  -3  -6 1295.97   83.29
   0   3   6 1055.09   79.09
   0   3   6 1253.47   81.89
   0   3   6 1251.17   87.09
  -1  -3  -6   58.59   24.10
  -1  -3  -6   62.49   20.50
  -1  -3  -6   21.30   15.30
  -1  -3  -6   66.19   28.00
  -1  -3  -6   36.20   11.50
  -1  -3  -6    8.90   19.50
   1   3   6   37.50   25.00
   1   3   6   25.30   21.50
   1   3   6   46.40   20.60
   1   3   6   47.60   13.70
   1   3   6   48.50   12.10
  -2  -3  -6  520.15   43.70
  -2  -3  -6  466.45   50.69
  -2  -3  -6  508.75   50.99
  -2  -3  -6  536.25   36.90
  -2  -3  -6  474.45   45.60
   2   3   6  479.45   50.89
   2   3   6  475.75   43.10
   2   3   6  435.26   46.10
   2   3   6  481.05   47.80
  -3  -3  -6   82.89   22.80
  -3  -3  -6   82.99   23.90
  -3  -3  -6   59.89   33.90
  -3  -3  -6   77.29   31.70
  -3  -3  -6   82.29   14.80
   3   3   6   78.99   24.80
   3   3   6   59.09   23.60
   3   3   6   40.40   22.40
  -4  -3  -6    4.00   28.40
  -4  -3  -6   11.30   10.40
  -4  -3  -6  -63.39   33.30
  -4  -3  -6    5.40   25.50
   4   3   6   17.90   27.70
   4   3   6   15.30   22.40
   4   3   6    4.20   21.00
  -5  -3  -6  -61.79   48.40
  -5  -3  -6   28.80   37.60
   5   3   6   -2.60   29.60
   5   3   6   40.10   30.60
   5   3   6   46.10   37.50
   3  -4  -6  201.98   35.70
   3  -4  -6  145.19   36.30
   2  -4  -6  340.57   40.90
  -2   4   6  345.27   51.49
  -2   4   6  375.26   65.89
   1  -4  -6   24.80   18.40
   1  -4  -6   95.89   54.39
   1  -4  -6   18.40   20.60
  -1   4   6   59.79   29.20
   0  -4  -6   51.79   17.70
   0  -4  -6  153.38   39.70
   0  -4  -6   96.69   36.30
   0  -4  -6  130.49   35.00
   0  -4  -6   52.39   22.20
   0   4   6  -25.90   27.50
   0   4   6   39.10   25.00
   0   4   6   36.00   19.80
  -1  -4  -6   43.10   25.60
  -1  -4  -6  -16.50   24.40
  -1  -4  -6   -1.00   19.20
  -1  -4  -6   50.19   29.60
  -1  -4  -6   16.60   14.50
   1   4   6   21.20   29.40
   1   4   6  -24.60   27.40
   1   4   6    6.80   20.90
   1   4   6   16.30   12.00
  -2  -4  -6   65.09   30.90
  -2  -4  -6   21.30   14.70
  -2  -4  -6   65.09   24.90
   2   4   6   40.70   29.10
   2   4   6   43.60   22.70
   2   4   6   29.60   38.60
   2   4   6   93.19   27.00
  -3  -4  -6    5.40   13.20
  -3  -4  -6   63.79   37.70
  -3  -4  -6   37.10   28.00
   3   4   6  -25.70   24.10
   3   4   6   49.80   30.30
   3   4   6  -43.40   23.20
  -4  -4  -6  138.39   40.10
  -4  -4  -6   96.39   18.20
   4   4   6   88.99   32.10
   4   4   6   77.29   31.60
   4   4   6  137.99   30.60
  -5  -4  -6   50.79   66.59
  -5  -4  -6   95.59   42.30
   5   4   6   65.29   36.00
   5   4   6  130.49   42.10
   5   4   6  137.09   34.60
   2  -5  -6   33.70   27.70
   2  -5  -6   43.00   33.40
  -2   5   6   48.60   46.60
   1  -5  -6   30.90   23.20
   1  -5  -6   -6.40   31.00
  -1   5   6    5.90   41.40
   0  -5  -6  539.85   69.89
   0  -5  -6  516.45   51.89
   0   5   6  359.16   51.29
   0   5   6  490.75   65.19
  -1  -5  -6  -26.20   36.70
  -1  -5  -6   38.60   37.20
  -1  -5  -6   -0.40   27.70
  -1  -5  -6   -4.30   18.70
   1   5   6   44.30   38.70
   1   5   6   15.40   23.90
   1   5   6   -8.10   30.20
   1   5   6   40.30   44.10
  -2  -5  -6    5.40   16.80
  -2  -5  -6   47.60   31.70
  -2  -5  -6   12.30   38.40
   2   5   6   36.80   24.70
   2   5   6  -13.80   30.20
   2   5   6  -15.90   34.80
   2   5   6   17.30   24.60
  -3  -5  -6  160.38   29.00
  -3  -5  -6   93.99   38.60
  -3  -5  -6  194.08   52.89
   3   5   6  150.58   36.80
   3   5   6  239.28   39.60
   3   5   6  178.18   38.90
   3   5   6  194.58   44.70
  -4  -5  -6  120.49   27.10
  -4  -5  -6   64.89   43.30
   4   5   6   96.19   43.30
   4   5   6   76.79   35.20
   4   5   6   79.99   37.80
  -5  -5  -6  310.37   42.50
   5   5   6  358.16   65.69
   5   5   6  463.55   69.69
   1  -6  -6   43.10   28.30
   1  -6  -6   80.89   40.00
  -1   6   6   39.60   52.09
   0  -6  -6  103.09   30.10
   0  -6  -6  123.79   39.00
   0   6   6   54.59   34.90
   0   6   6   59.89   55.89
  -1  -6  -6  204.28   54.19
  -1  -6  -6  176.48   41.20
  -1  -6  -6  241.08   39.30
   1   6   6  166.48   65.89
   1   6   6  239.18   62.19
   1   6   6  213.78   40.20
  -2  -6  -6  115.39   41.60
  -2  -6  -6   90.89   26.00
   2   6   6   76.39   29.70
   2   6   6   66.09   42.60
   2   6   6  118.59   51.79
  -3  -6  -6  850.41   87.09
  -3  -6  -6  924.81   93.99
   3   6   6  853.11   75.29
   3   6   6  754.72   80.59
   3   6   6  724.93   76.99
   3   6   6  682.93   84.39
  -4  -6  -6  394.66   52.79
  -4  -6  -6  439.86   81.19
   4   6   6  165.28   65.19
   4   6   6  301.17   52.49
   4   6   6  503.95   84.59
  -1  -7  -6  458.05   73.19
  -1  -7  -6  481.75   57.99
   1   7   6  485.55   68.39
   1   7   6  439.76   97.09
  -2  -7  -6  229.58   40.20
  -2  -7  -6  269.37   58.29
   2   7   6  233.88   47.30
   2   7   6  226.38   67.89
   1   6  -7  300.57   60.09
  -1  -6   7  173.58   77.69
  -1  -6   7  168.28   52.69
   0   6  -7  131.79   36.90
   0   6  -7   80.39   55.49
   0  -6   7   12.10   47.50
   0  -6   7   37.70   69.89
  -1   6  -7  -36.70   29.10
   1  -6   7   -2.70   41.20
   1  -6   7   38.20   65.49
  -2   6  -7   -9.10   34.20
  -2   6  -7  -66.69  117.09
   2  -6   7   40.30   39.30
   2  -6   7    5.90   68.29
   2   5  -7  107.69   34.90
   2   5  -7   64.79   25.70
   2   5  -7   92.19   47.40
  -2  -5   7  -48.60   49.20
  -2  -5   7   18.30   71.39
   1   5  -7  -24.40   44.50
   1   5  -7   47.00   29.50
   1   5  -7   22.10   17.90
  -1  -5   7   64.29   43.20
  -1  -5   7   21.90   62.99
   0   5  -7   50.99   39.90
   0   5  -7  115.39   32.90
   0   5  -7  132.09   20.30
   0   5  -7  112.79   24.70
   0   5  -7  156.98   32.70
   0  -5   7  121.49   38.20
   0  -5   7  235.48   62.69
  -1   5  -7   59.79   31.20
  -1   5  -7   62.09   44.00
  -1   5  -7   17.80   32.10
   1  -5   7  -41.10   40.30
   1  -5   7   58.89   45.90
   1  -5   7    7.60   30.10
   1  -5   7   42.80   34.40
  -2   5  -7   50.59   46.60
  -2   5  -7   -3.30   29.10
   2  -5   7   38.30   38.60
   2  -5   7   27.20   33.00
   2  -5   7  -32.70   28.50
  -3   5  -7   -8.70   26.50
   3  -5   7  -30.40   44.80
   3  -5   7   20.00   33.60
   3  -5   7    9.00   39.40
   2   4  -7  432.36   44.00
   2   4  -7  426.16   41.20
   2   4  -7  330.37   62.29
  -2  -4   7  311.47   56.39
  -2  -4   7  305.27   75.39
   1   4  -7   81.39   39.30
   1   4  -7   34.80   16.60
   1   4  -7   27.70   40.70
   1   4  -7   14.80   28.20
   1   4  -7   63.89   33.60
  -1  -4   7  -13.10   33.20
   0   4  -7   -6.90   25.00
   0   4  -7   -9.70   24.00
   0   4  -7   32.90   26.80
   0   4  -7   18.00   12.30
   0   4  -7    9.40   30.50
   0  -4   7   62.89   42.00
  -1   4  -7   16.70   26.40
  -1   4  -7   60.59   27.40
  -1   4  -7   44.30   31.70
   1  -4   7   34.70   23.10
   1  -4   7   42.90   33.60
   1  -4   7   44.10   23.70
   1  -4   7  -13.70   20.70
   1  -4   7   75.09   32.30
  -2   4  -7   18.50   43.20
  -2   4  -7  117.09   36.60
  -2   4  -7   61.39   34.50
   2  -4   7   59.39   25.50
   2  -4   7    9.10   20.30
   2  -4   7   -2.90   27.20
   2  -4   7   37.40   36.20
  -3   4  -7  238.38   36.50
   3  -4   7   90.19   40.50
   3  -4   7  179.38   34.00
   3  -4   7  182.88   36.00
   3  -4   7  134.29   24.30
   3  -4   7  147.39   32.00
  -4   4  -7  175.58   37.60
   4  -4   7  171.78   52.59
   4  -4   7  211.78   43.40
   4  -4   7  240.88   40.20
   3   3  -7  -34.00   49.80
   3   3  -7   21.20   24.00
  -3  -3   7   71.79   50.29
  -3  -3   7  154.18   71.99
   2   3  -7    1.50   77.39
   2   3  -7   -8.60   22.90
   2   3  -7    9.10   18.90
  -2  -3   7    7.70   50.29
  -2  -3   7   35.10   34.70
  -2  -3   7  -77.59   50.79
   1   3  -7  190.28   39.30
   1   3  -7  113.99   23.50
   1   3  -7  216.98   41.30
   1   3  -7  146.19   25.30
  -1  -3   7   93.69   51.49
  -1  -3   7  215.18   46.10
  -1  -3   7  146.49   36.00
   0   3  -7   16.80   17.60
   0   3  -7   37.70   27.30
   0   3  -7    1.60   23.50
   0   3  -7   29.40   22.40
   0   3  -7   16.80   12.40
   0  -3   7   23.40   24.20
   0  -3   7   -9.40   42.20
   0  -3   7   39.90   17.50
   0  -3   7    5.40   21.60
  -1   3  -7  125.99   21.70
  -1   3  -7   95.69   14.50
  -1   3  -7  136.59   26.30
  -1   3  -7  105.39   17.50
  -1   3  -7  138.49   28.50
   1  -3   7  142.99   30.60
   1  -3   7   94.39   17.20
   1  -3   7  125.39   41.60
   1  -3   7  106.29   23.60
   1  -3   7  129.99   36.20
   1  -3   7  123.39   26.40
  -2   3  -7   41.90   26.80
  -2   3  -7    0.70   17.40
  -2   3  -7   59.59   32.20
   2  -3   7    1.60   18.70
   2  -3   7  -30.40   23.80
   2  -3   7    3.10   13.10
   2  -3   7   65.59   32.50
   2  -3   7    1.00   19.50
  -3   3  -7  311.27   49.10
  -3   3  -7  264.07   35.70
   3  -3   7  226.88   41.50
   3  -3   7  247.98   38.20
   3  -3   7  253.67   27.20
   3  -3   7  233.38   43.60
   3  -3   7  297.07   40.50
  -4   3  -7   15.30   29.60
  -4   3  -7   72.89   39.60
   4  -3   7   91.29   32.50
   4  -3   7   92.29   60.69
   3   2  -7   22.70   20.50
   3   2  -7   -6.20   25.90
  -3  -2   7   48.50   64.79
  -3  -2   7   -2.10   42.80
   2   2  -7   60.29   21.10
  -2  -2   7   96.69   56.79
  -2  -2   7   71.69   35.30
   1   2  -7   32.60   17.40
   1   2  -7   85.59   36.20
   1   2  -7  119.59   37.20
   1   2  -7   39.90   15.80
  -1  -2   7   84.49   38.20
  -1  -2   7   66.59   27.20
  -1  -2   7    3.20   33.20
   0   2  -7   33.40   12.40
   0   2  -7   34.90   27.70
   0   2  -7   36.40   24.20
   0   2  -7   46.00   15.30
   0   2  -7   56.29   23.20
   0  -2   7   27.90   15.40
   0  -2   7   96.89   21.60
   0  -2   7   60.99   29.90
   0  -2   7   69.69   31.60
   0  -2   7   35.20   26.60
   0  -2   7    3.70   19.30
  -1   2  -7  171.08   23.40
  -1   2  -7  140.39   18.00
  -1   2  -7  214.28   35.10
  -1   2  -7  158.68   25.10
  -1   2  -7  190.48   27.10
   1  -2   7  156.58   34.10
   1  -2   7  149.49   25.90
   1  -2   7  166.18   21.60
   1  -2   7  171.88   39.10
   1  -2   7  179.78   28.90
   1  -2   7  165.68   32.20
  -2   2  -7  103.09   26.40
  -2   2  -7   87.69   13.30
  -2   2  -7   90.99   15.30
  -2   2  -7   64.49   27.80
  -2   2  -7   57.09   17.20
   2  -2   7  126.39   40.90
   2  -2   7   71.09   28.30
   2  -2   7   45.30   20.80
   2  -2   7  101.19   24.60
   2  -2   7   73.39   21.10
  -3   2  -7  252.87   43.50
  -3   2  -7  393.26   54.19
  -3   2  -7  289.97   31.60
   3  -2   7  331.27   39.20
   3  -2   7  270.17   39.30
   3  -2   7  330.07   38.30
   3  -2   7  212.88   42.50
  -4   2  -7  249.58   35.90
  -4   2  -7  233.78   50.09
   4  -2   7  241.48   43.40
   4  -2   7  257.47   41.70
   4  -2   7  219.88   36.60
   4  -2   7  296.77   50.79
  -5   2  -7   13.50   46.40
  -5   2  -7   67.19   28.70
   5  -2   7  -25.10   52.39
   5  -2   7  116.49   37.70
   3   1  -7   59.19   23.80
   3   1  -7   41.30   20.50
   3   1  -7  -16.50   22.80
  -3  -1   7  123.39   64.49
  -3  -1   7   72.39   40.60
   2   1  -7  -30.00   24.00
  -2  -1   7   22.20   55.89
  -2  -1   7   -8.20   47.40
  -2  -1   7  -11.50   27.60
   1   1  -7  253.87   26.60
   1   1  -7  236.58   26.30
   1   1  -7  280.87   38.80
   1   1  -7  210.98   42.90
   1   1  -7  347.87   51.09
  -1  -1   7  276.67   31.10
  -1  -1   7  260.47   36.80
  -1  -1   7  229.58   38.40
   0   1  -7   -5.10   23.50
   0   1  -7    3.00    9.30
   0   1  -7    4.30   19.00
   0   1  -7  -16.10   24.20
   0   1  -7    3.90   10.60
   0  -1   7   34.10   26.80
   0  -1   7   -5.50   12.90
   0  -1   7    2.50   24.60
   0  -1   7   14.90   15.70
   0  -1   7   19.40   16.90
  -1   1  -7 2822.82  175.28
  -1   1  -7 2601.34  167.18
  -1   1  -7 2665.83  172.08
  -1   1  -7 2954.20  174.88
  -1   1  -7 2649.53  170.98
  -1   1  -7 2580.54  168.68
   1  -1   7 2614.64  171.18
   1  -1   7 2502.95  177.38
   1  -1   7 2732.53  168.68
   1  -1   7 2490.15  175.98
   1  -1   7 2343.07  175.98
  -2   1  -7 1369.76   91.89
  -2   1  -7 1233.18   81.99
  -2   1  -7 1314.27   85.59
  -2   1  -7 1217.58   91.39
  -2   1  -7 1148.49   84.09
   2  -1   7 1339.77   94.29
   2  -1   7 1262.87   91.29
   2  -1   7 1267.57   82.49
   2  -1   7 1278.87   87.29
   2  -1   7 1267.37   88.49
   2  -1   7 1130.09   96.69
  -3   1  -7   58.99   11.30
  -3   1  -7   70.69   34.40
  -3   1  -7   74.89   17.40
  -3   1  -7   59.19   26.00
  -3   1  -7   69.89   12.50
   3  -1   7   57.39   24.10
   3  -1   7   69.49   31.10
   3  -1   7   68.99   22.50
   3  -1   7   37.40   54.09
   3  -1   7   45.70   24.60
  -4   1  -7   88.69   21.10
  -4   1  -7   57.09   42.90
   4  -1   7   75.69   38.60
   4  -1   7   88.49   29.70
   4  -1   7   43.80   38.70
  -5   1  -7   32.80   28.80
  -5   1  -7   14.60   50.79
   5  -1   7   11.90   31.30
   5  -1   7   45.90   50.79
   3   0  -7   73.89   22.80
   3   0  -7  129.39   25.90
  -3   0   7   62.49   40.70
  -3   0   7   70.09   62.59
   2   0  -7    8.70   26.20
   2   0  -7    0.20   19.40
   2   0  -7   23.30   27.60
  -2   0   7   13.60   26.30
  -2   0   7  -76.69   47.80
   1   0  -7 1124.49   98.09
   1   0  -7 1348.67   85.29
   1   0  -7 1231.88   84.99
   1   0  -7 1263.57   87.89
   1   0  -7 1337.07  102.59
  -1   0   7 1158.08   85.19
  -1   0   7 1245.98   87.99
  -1   0   7 1243.28   89.79
  -1   0   7 1193.68   84.99
   0   0  -7 2157.48  129.09
   0   0  -7 2190.38  128.29
   0   0  -7 2075.99  136.19
   0   0  -7 1975.50  135.69
   0   0   7 1961.30  127.69
   0   0   7 1917.01  130.79
   0   0   7 1900.11  138.79
   0   0   7 1645.34  136.39
   0   0   7 1777.52  130.89
  -1   0  -7  -13.10   22.30
  -1   0  -7   -3.60    8.70
  -1   0  -7    2.50   10.50
  -1   0  -7   25.10   19.30
  -1   0  -7   15.70   18.70
   1   0   7   17.70   25.20
   1   0   7   28.70   17.70
   1   0   7   16.90   10.50
   1   0   7   18.00   23.10
   1   0   7    0.90   18.90
   1   0   7   -3.40   13.90
  -2   0  -7  127.09   18.30
  -2   0  -7  143.19   23.90
  -2   0  -7  174.78   30.00
  -2   0  -7  112.69   15.50
  -2   0  -7  132.59   30.10
   2   0   7  156.78   27.70
   2   0   7   97.59   24.10
   2   0   7  178.88   34.50
   2   0   7  175.28   25.50
  -3   0  -7   48.80   12.00
  -3   0  -7   28.40   13.60
  -3   0  -7   54.19   12.90
  -3   0  -7   49.40   27.90
  -3   0  -7  101.59   35.50
   3   0   7  -14.00   24.10
   3   0   7   30.80   24.80
   3   0   7   20.70   27.80
  -4   0  -7  131.19   21.50
  -4   0  -7   98.49   19.50
  -4   0  -7  141.49   17.80
  -4   0  -7   40.50   34.50
   4   0   7  164.88   33.10
   4   0   7  171.68   39.50
   4   0   7   66.99   39.10
  -5   0  -7  -27.40   44.60
  -5   0  -7   37.50   25.00
   5   0   7  -97.59   41.90
   5   0   7    4.80   32.30
   3  -1  -7   70.29   22.60
   3  -1  -7  208.58   51.49
   3  -1  -7   80.79   23.10
  -3   1   7   76.19   40.00
  -3   1   7   21.10   61.59
   2  -1  -7  179.38   33.90
  -2   1   7  149.09   31.40
  -2   1   7  175.38   59.19
   1  -1  -7   14.70   13.60
   1  -1  -7   11.50   14.90
   1  -1  -7   45.30   20.00
  -1   1   7   24.50   26.00
  -1   1   7   43.50   17.70
  -1   1   7    9.60   20.40
  -1   1   7   50.49   24.80
   0  -1  -7   -1.30   25.80
   0  -1  -7   10.20   11.60
   0  -1  -7    8.20   11.80
   0  -1  -7  -26.20   25.70
   0  -1  -7   14.50   16.00
   0   1   7    3.20   14.30
   0   1   7  -26.60   21.90
   0   1   7   44.50   27.20
   0   1   7  -11.20   11.60
   0   1   7    1.60   18.80
  -1  -1  -7   48.80   20.30
  -1  -1  -7   17.90   10.70
  -1  -1  -7  -17.10   23.80
  -1  -1  -7    4.70   12.20
  -1  -1  -7   30.00   13.00
  -1  -1  -7   28.90   21.20
   1   1   7   15.50   25.40
   1   1   7   -2.20   14.60
   1   1   7   17.10   21.00
   1   1   7   -0.20   10.30
   1   1   7  -26.00   18.60
  -2  -1  -7  229.58   24.20
  -2  -1  -7  175.08   17.80
  -2  -1  -7  216.38   32.80
  -2  -1  -7  179.88   26.40
   2   1   7  167.68   32.10
   2   1   7  178.58   19.20
   2   1   7  114.59   26.50
   2   1   7  189.58   27.50
   2   1   7  165.98   30.50
  -3  -1  -7    6.00   27.30
  -3  -1  -7   18.00   13.70
  -3  -1  -7    5.20   16.80
   3   1   7    4.20   23.00
   3   1   7   11.90   27.10
   3   1   7   32.50   23.90
  -4  -1  -7   40.70   34.90
  -4  -1  -7   15.40   15.90
  -4  -1  -7   57.89   17.50
  -4  -1  -7   56.09   18.80
   4   1   7   77.29   29.50
   4   1   7   75.09   33.20
  -5  -1  -7  314.17   66.69
  -5  -1  -7  290.17   31.10
  -5  -1  -7  283.17   32.50
  -5  -1  -7  226.48   32.30
   5   1   7  305.07   60.09
   5   1   7  224.68   56.29
   3  -2  -7   90.39   27.00
   3  -2  -7   68.59   26.60
   2  -2  -7  413.46   41.50
   2  -2  -7  456.55   44.20
   2  -2  -7  366.86   42.20
  -2   2   7  602.14   84.09
  -2   2   7  392.56   49.00
   1  -2  -7  115.89   43.70
   1  -2  -7   37.70   16.20
   1  -2  -7   21.70   17.60
  -1   2   7   52.19   19.50
  -1   2   7    4.50   27.80
  -1   2   7   46.60   25.70
   0  -2  -7  820.02   67.69
   0  -2  -7  844.32   58.19
   0  -2  -7  822.02   59.59
   0  -2  -7  813.02   57.29
   0   2   7  777.32   57.69
   0   2   7  793.32   56.99
   0   2   7  732.23   72.39
   0   2   7  879.31   64.79
   0   2   7  689.13   68.29
  -1  -2  -7    8.50   13.10
  -1  -2  -7   -2.10   19.90
  -1  -2  -7   21.40   27.40
  -1  -2  -7   -7.90   16.90
  -1  -2  -7   19.10   11.30
  -1  -2  -7   22.40   22.10
   1   2   7   11.30   24.00
   1   2   7  -23.30   21.90
   1   2   7   24.20   13.40
   1   2   7  -22.40   18.90
   1   2   7   20.80   13.20
  -2  -2  -7   64.39   22.30
  -2  -2  -7   81.29   17.80
  -2  -2  -7   88.19   31.70
  -2  -2  -7   92.39   27.90
  -2  -2  -7   87.79   15.60
   2   2   7   82.99   26.40
   2   2   7   83.79   43.50
   2   2   7   73.89   28.10
   2   2   7   62.19   13.60
   2   2   7   77.09   18.80
  -3  -2  -7  616.84   41.70
  -3  -2  -7  593.34   48.90
  -3  -2  -7  712.43   68.99
  -3  -2  -7  661.93   52.69
  -3  -2  -7  537.75   59.79
   3   2   7  539.35   56.69
   3   2   7  579.14   70.19
   3   2   7  523.05   57.09
  -4  -2  -7   14.90   44.30
  -4  -2  -7   16.60   21.20
  -4  -2  -7    9.10   24.10
   4   2   7   46.10   42.60
   4   2   7   20.30   29.20
  -5  -2  -7  881.11   96.39
  -5  -2  -7  983.40   70.29
   5   2   7  802.12   66.09
   5   2   7  780.62   77.19
   5   2   7  885.61   83.49
   3  -3  -7   95.99   30.00
   3  -3  -7   51.89   32.40
  -3   3   7   64.19   62.09
   2  -3  -7  148.59   28.30
   2  -3  -7  163.68   29.40
  -2   3   7   79.09   57.49
  -2   3   7  199.88   45.30
   1  -3  -7  186.68   32.60
   1  -3  -7  324.27   56.09
   1  -3  -7  183.78   33.20
  -1   3   7  239.38   39.70
  -1   3   7  176.68   25.30
   0  -3  -7   40.30   19.90
   0  -3  -7  122.49   76.19
   0  -3  -7   23.80   15.00
   0  -3  -7   50.29   35.20
   0  -3  -7   37.60   18.80
   0   3   7   85.79   31.80
   0   3   7    5.00   26.20
   0   3   7   39.60   15.30
   0   3   7   24.40   17.90
  -1  -3  -7  299.67   27.70
  -1  -3  -7  293.47   36.60
  -1  -3  -7  296.47   52.09
  -1  -3  -7  299.17   32.80
  -1  -3  -7  261.97   38.30
   1   3   7  230.28   28.30
   1   3   7  251.17   44.30
   1   3   7  224.18   41.20
   1   3   7  270.47   27.20
   1   3   7  290.07   44.40
  -2  -3  -7    0.20   34.60
  -2  -3  -7    5.80   28.00
  -2  -3  -7    4.20   18.80
  -2  -3  -7   13.20   11.70
  -2  -3  -7   -7.60   23.50
   2   3   7    5.00   25.60
   2   3   7   20.10   44.60
   2   3   7  -38.70   21.00
  -3  -3  -7  690.23   54.89
  -3  -3  -7  670.83   64.99
  -3  -3  -7  635.74   44.10
   3   3   7  483.65   51.19
   3   3   7  618.14   60.29
   3   3   7  560.44   57.79
  -4  -3  -7  463.65   49.30
  -4  -3  -7  386.86   31.20
  -4  -3  -7  457.75   66.09
   4   3   7  233.08   54.09
   4   3   7  351.46   53.49
   4   3   7  362.56   45.90
  -5  -3  -7   67.29   20.80
  -5  -3  -7   -4.20   34.90
  -5  -3  -7  117.69   55.89
   5   3   7   53.39   42.80
   5   3   7   20.30   32.20
   5   3   7  -44.80   28.90
   2  -4  -7   36.00   29.40
   2  -4  -7  103.29   26.50
  -2   4   7   11.70   55.99
   1  -4  -7  112.89   25.50
   1  -4  -7  134.29   30.80
  -1   4   7   96.49   40.90
   0  -4  -7   69.29   24.90
   0  -4  -7   -5.50   44.40
   0  -4  -7   63.29   19.00
   0  -4  -7   44.30   26.40
   0   4   7   32.30   36.50
   0   4   7   24.70   30.00
  -1  -4  -7   28.30   30.20
  -1  -4  -7  -12.90   29.10
  -1  -4  -7   50.29   46.30
  -1  -4  -7  -12.00   15.10
  -1  -4  -7  -14.90   24.10
   1   4   7   76.79   43.50
   1   4   7   -4.60   13.20
   1   4   7  -23.20   24.40
   1   4   7   -8.50   33.50
  -2  -4  -7    5.90   24.30
  -2  -4  -7    5.00   37.70
  -2  -4  -7    7.10   14.80
  -2  -4  -7   52.49   46.70
   2   4   7  -42.40   24.50
   2   4   7   11.70   31.60
  -3  -4  -7   12.00   15.70
  -3  -4  -7    3.60   43.10
  -3  -4  -7   25.10   54.89
   3   4   7   30.20   32.20
   3   4   7   41.60   37.00
   3   4   7    9.90   31.80
  -4  -4  -7   12.30   33.50
  -4  -4  -7   49.30   17.80
  -4  -4  -7   27.90   49.99
   4   4   7   17.20   33.80
   4   4   7   83.99   40.30
   4   4   7    2.00   32.80
  -5  -4  -7   45.80   63.89
  -5  -4  -7   29.80   41.50
   5   4   7  -17.80   43.10
   5   4   7   44.90   43.40
   5   4   7  121.29   45.10
   1  -5  -7  327.17   51.29
   0  -5  -7  144.99   38.90
   0  -5  -7  125.49   34.60
   0  -5  -7  206.68   35.20
   0   5   7  106.49   37.00
   0   5   7   50.09   53.69
  -1  -5  -7   70.59   46.00
  -1  -5  -7   72.29   36.00
  -1  -5  -7  118.19   32.30
   1   5   7   58.69   20.70
   1   5   7  106.39   16.70
   1   5   7   67.49   34.60
   1   5   7   -0.20   37.10
  -2  -5  -7  235.78   33.60
  -2  -5  -7  199.88   40.70
   2   5   7  121.39   43.10
   2   5   7  176.68   44.10
   2   5   7  230.78   49.70
  -3  -5  -7    2.60   35.40
  -3  -5  -7   52.09   24.10
   3   5   7   42.70   34.10
   3   5   7   41.90   37.70
   3   5   7    7.10   39.90
   3   5   7   42.20   45.10
  -4  -5  -7  369.76   64.89
  -4  -5  -7  214.68   38.20
   4   5   7  244.68   47.20
   4   5   7  246.58   56.69
   4   5   7  136.99   45.50
   0  -6  -7  374.76   61.89
   0  -6  -7  342.07   48.60
   0   6   7  322.57   53.19
  -1  -6  -7    0.10   26.20
  -1  -6  -7   74.79   39.80
   1   6   7  121.39   96.19
  -2  -6  -7  104.09   30.90
  -2  -6  -7   49.20   42.60
   2   6   7   94.59   61.19
   2   6   7   57.49   51.69
   2   6   7  163.08   40.70
  -3  -6  -7   97.39   32.80
  -3  -6  -7  134.59   47.70
   3   6   7   31.40   61.39
   3   6   7  130.09   60.09
   3   6   7   53.99   40.90
   1   5  -8   41.60   34.30
   1   5  -8   80.69   47.50
   1   5  -8   83.49   23.70
  -1  -5   8  -26.90   47.40
  -1  -5   8   52.39   76.09
   0   5  -8  -26.30   45.70
   0   5  -8  -37.90   29.90
   0   5  -8   21.90   17.40
   0  -5   8   18.60   42.20
   0  -5   8  104.89   72.59
  -1   5  -8   77.49   35.50
  -1   5  -8  189.18   55.99
   1  -5   8  113.19   41.70
   1  -5   8  167.78   60.49
  -2   5  -8  -57.09   55.29
  -2   5  -8   35.70   38.30
   2  -5   8  -35.10   34.90
   2  -5   8   88.99   53.69
   2   4  -8   49.70   25.60
   2   4  -8   52.79   30.30
  -2  -4   8   11.10   54.49
  -2  -4   8    2.10   74.09
   1   4  -8   55.39   20.70
   1   4  -8  -29.70   52.39
   1   4  -8   60.69   40.40
   1   4  -8   57.29   30.40
  -1  -4   8  120.39   70.09
  -1  -4   8   28.20   39.20
   0   4  -8   99.79   27.50
   0   4  -8   94.79   35.60
   0   4  -8  113.99   44.60
   0   4  -8   59.79   17.30
   0   4  -8  112.99   34.70
   0  -4   8   81.79   36.40
  -1   4  -8  896.81   80.99
  -1   4  -8  954.50   71.49
  -1   4  -8  884.51   78.99
   1  -4   8  922.91   85.69
   1  -4   8  870.81   77.89
   1  -4   8  842.62   84.49
  -2   4  -8  318.67   41.80
  -2   4  -8  332.37   59.69
  -2   4  -8  306.47   54.39
   2  -4   8  273.27   49.50
   2  -4   8  298.97   47.60
   2  -4   8  297.47   39.80
   2  -4   8  250.47   47.10
   2  -4   8  242.88   51.59
  -3   4  -8    4.00   34.20
   3  -4   8   61.39   35.60
   3  -4   8   14.80   38.70
   3  -4   8   78.19   49.00
   2   3  -8  160.98   31.80
   2   3  -8  139.19   29.90
  -2  -3   8  192.58   65.89
  -2  -3   8  148.99   47.90
  -2  -3   8   32.40   68.29
   1   3  -8   23.10   18.70
   1   3  -8   28.80   22.80
   1   3  -8   25.80   62.29
  -1  -3   8   65.79   60.19
  -1  -3   8   17.90   36.00
  -1  -3   8    5.20   61.79
   0   3  -8   91.19   24.60
   0   3  -8   91.99   28.00
   0   3  -8   81.49   35.40
   0   3  -8  107.09   39.10
   0   3  -8  137.69   21.80
   0  -3   8   78.79   31.80
  -1   3  -8   52.09   12.50
  -1   3  -8   10.60   34.90
  -1   3  -8  -12.10   25.80
  -1   3  -8   19.80   20.10
   1  -3   8   13.40   20.10
   1  -3   8   53.49   34.70
   1  -3   8    6.30   36.60
  -2   3  -8   -6.10   29.40
  -2   3  -8   75.99   41.80
   2  -3   8   36.30   26.20
   2  -3   8   34.10   40.10
   2  -3   8   30.60   33.40
   2  -3   8    5.70   29.10
   2  -3   8   -8.30   19.00
  -3   3  -8  135.99   40.70
  -3   3  -8  198.88   36.10
   3  -3   8  183.58   35.60
   3  -3   8   78.29   45.70
   3  -3   8  124.39   23.80
   3  -3   8  118.39   37.80
   3  -3   8  168.48   36.60
  -4   3  -8   19.30   35.50
  -4   3  -8  -12.70   46.60
   4  -3   8  -22.30   34.60
   4  -3   8   30.80   52.79
   4  -3   8   37.90   33.50
   2   2  -8   50.39   22.20
   2   2  -8   79.09   25.80
  -2  -2   8  -40.20   62.99
  -2  -2   8   63.69   39.90
  -2  -2   8   48.80   48.90
   1   2  -8  173.98   27.80
   1   2  -8  167.28   29.80
  -1  -2   8  223.18   58.09
  -1  -2   8  239.18   45.70
  -1  -2   8  175.78   53.79
   0   2  -8  100.79   22.20
   0   2  -8  100.69   17.80
   0   2  -8  125.09   35.00
   0   2  -8  120.59   40.50
   0  -2   8   87.89   44.00
   0  -2   8   79.89   22.00
   0  -2   8   64.19   28.70
   0  -2   8   84.19   34.80
  -1   2  -8   56.49   19.20
  -1   2  -8   43.80   21.20
  -1   2  -8   39.40   13.50
  -1   2  -8   30.50   22.60
  -1   2  -8   34.80   34.30
   1  -2   8   53.39   29.20
   1  -2   8   69.99   36.80
   1  -2   8   48.20   17.50
   1  -2   8   16.70   23.30
   1  -2   8   20.30   45.60
   1  -2   8   49.30   24.80
  -2   2  -8    2.70   13.20
  -2   2  -8   43.20   18.70
  -2   2  -8   17.70   29.30
  -2   2  -8   12.50   10.20
  -2   2  -8   12.20   36.60
   2  -2   8   16.60   25.30
   2  -2   8  -10.50   35.50
   2  -2   8    3.50   25.50
   2  -2   8   13.40   22.40
   2  -2   8  -25.00   15.00
  -3   2  -8   27.60   31.60
  -3   2  -8    8.40   23.30
   3  -2   8  -24.60   27.60
   3  -2   8    5.20   14.10
   3  -2   8   48.20   24.40
   3  -2   8   18.90   36.90
   3  -2   8  -57.29   32.40
  -4   2  -8  -70.39   37.90
  -4   2  -8   44.00   29.00
   4  -2   8   21.50   48.60
   4  -2   8   28.90   55.19
   4  -2   8   63.69   30.90
   4  -2   8   -0.20   33.10
   3   1  -8   80.09   28.50
   3   1  -8   70.89   31.90
  -3  -1   8  170.38   75.19
  -3  -1   8   77.79   49.20
   2   1  -8  645.34   51.39
   2   1  -8  567.64   51.69
   2   1  -8  659.23   52.09
  -2  -1   8  490.35   61.69
  -2  -1   8  613.84  104.09
  -2  -1   8  527.95   86.99
   1   1  -8   17.00   15.10
   1   1  -8   18.50   15.70
  -1  -1   8   64.89   37.00
  -1  -1   8   30.20   30.50
  -1  -1   8   35.80   75.39
   0   1  -8   48.30   14.50
   0   1  -8   15.60   13.80
   0   1  -8   82.89   15.80
   0   1  -8   54.69   34.50
   0   1  -8   77.29   27.50
   0   1  -8   89.69   34.10
   0  -1   8   38.10   35.40
   0  -1   8   55.29   20.10
   0  -1   8   31.50   31.30
   0  -1   8   57.69   23.30
   0  -1   8   74.09   36.30
  -1   1  -8    3.20   14.10
  -1   1  -8   10.20   10.90
  -1   1  -8  -57.19   31.00
  -1   1  -8   14.80   24.90
  -1   1  -8   10.90   22.80
   1  -1   8   16.30   23.40
   1  -1   8   15.50   26.30
   1  -1   8  -24.80   30.80
   1  -1   8  -46.90   33.40
   1  -1   8   -4.10   16.90
   1  -1   8    5.40   15.30
  -2   1  -8  -37.90   23.10
  -2   1  -8    9.40   16.40
  -2   1  -8    0.30   17.00
  -2   1  -8    9.00   10.30
  -2   1  -8   45.90   32.50
   2  -1   8   31.80   24.50
   2  -1   8   -0.70   41.30
   2  -1   8   26.60   27.40
   2  -1   8    7.30   18.30
   2  -1   8   20.70   13.60
   2  -1   8   15.60   32.40
  -3   1  -8   37.60   18.30
  -3   1  -8   84.39   33.70
  -3   1  -8   41.70   10.00
  -3   1  -8   39.30   12.40
   3  -1   8   45.30   29.20
   3  -1   8   80.09   33.00
   3  -1   8   27.30   33.00
   3  -1   8   40.70   23.30
  -4   1  -8   25.80   23.50
  -4   1  -8   29.70   38.70
   4  -1   8   15.20   28.00
   4  -1   8  -66.19   40.70
  -5   1  -8  779.22   85.09
  -5   1  -8  759.62   65.79
   5  -1   8  662.43   80.39
   3   0  -8   51.19   25.30
   3   0  -8  -27.40   26.40
  -3   0   8   -4.10   49.80
  -3   0   8   52.69   75.39
   2   0  -8   96.19   25.30
   2   0  -8   72.49   22.80
  -2   0   8  125.09   65.09
  -2   0   8  120.79   37.20
   1   0  -8   12.30   16.50
   1   0  -8   64.99   30.00
   1   0  -8   26.20   15.70
  -1   0   8   16.80   27.80
   0   0  -8    2.30   14.30
   0   0  -8   10.10   12.60
   0   0  -8   65.19   33.40
   0   0   8   34.20   19.40
   0   0   8   30.80   16.10
   0   0   8   50.59   31.90
   0   0   8   16.00   35.10
   0   0   8   41.00   27.50
  -1   0  -8   12.10   30.70
  -1   0  -8   15.50   13.70
  -1   0  -8   32.70   22.50
  -1   0  -8   -4.10   24.00
  -1   0  -8    0.20   11.40
   1   0   8    5.80   13.50
   1   0   8   19.50   29.90
   1   0   8   19.70   26.70
   1   0   8  -16.00   16.50
   1   0   8   10.00   33.50
   1   0   8   34.00   23.70
  -2   0  -8   65.79   12.40
  -2   0  -8   49.99   14.40
  -2   0  -8   27.70   19.90
  -2   0  -8  114.79   28.50
  -2   0  -8    8.80   33.00
   2   0   8   57.89   27.10
   2   0   8   38.90   27.30
   2   0   8   42.50   20.50
   2   0   8   55.69   13.60
   2   0   8   94.09   33.80
  -3   0  -8   38.40   33.70
  -3   0  -8   15.10   16.80
  -3   0  -8   23.30   17.50
  -3   0  -8   30.40   13.70
   3   0   8   31.40   26.90
   3   0   8  -10.80   30.10
   3   0   8    1.70   23.20
   3   0   8   38.50   36.90
  -4   0  -8   54.59   19.70
  -4   0  -8   44.50   14.80
  -4   0  -8   56.19   22.40
  -4   0  -8  126.99   39.80
   4   0   8   84.49   36.70
   4   0   8   17.90   39.60
  -5   0  -8  128.99   29.40
  -5   0  -8  123.39   49.40
   5   0   8  141.29   48.20
   5   0   8    1.20   43.60
  -3   1   8   52.69   45.50
   2  -1  -8  248.88   34.60
   2  -1  -8  271.67   43.70
   2  -1  -8  184.28   34.20
  -2   1   8  104.19   65.99
  -2   1   8  230.38   40.60
   1  -1  -8   37.40   17.70
  -1   1   8   27.00   26.70
   0  -1  -8   40.10   17.00
   0  -1  -8   61.69   32.70
   0  -1  -8   52.29   15.70
   0   1   8   29.10   19.20
   0   1   8   28.60   34.80
   0   1   8   23.00   31.50
   0   1   8   36.30   17.90
  -1  -1  -8  154.18   28.90
  -1  -1  -8  159.88   21.40
  -1  -1  -8  132.49   31.00
  -1  -1  -8   90.49   19.10
   1   1   8  107.29   18.80
   1   1   8  124.89   36.80
   1   1   8  144.29   35.30
   1   1   8  138.39   24.10
  -2  -1  -8   84.19   17.70
  -2  -1  -8  112.29   24.50
  -2  -1  -8   95.39   17.10
  -2  -1  -8   85.99   29.20
   2   1   8  155.08   44.00
   2   1   8   81.09   15.80
   2   1   8   85.19   34.20
   2   1   8   75.09   21.20
   2   1   8   88.59   28.70
  -3  -1  -8 1051.69   74.19
  -3  -1  -8 1033.80   66.19
  -3  -1  -8 1077.59   71.29
  -3  -1  -8  967.70   82.69
   3   1   8  934.41   82.69
   3   1   8  992.30   77.29
   3   1   8  844.82   81.59
  -4  -1  -8  294.37   31.80
  -4  -1  -8  274.87   57.59
  -4  -1  -8  276.17   32.70
  -4  -1  -8  281.77   37.00
   4   1   8  155.88   42.30
   4   1   8  191.68   44.40
  -5  -1  -8   60.89   27.30
  -5  -1  -8  -29.00   52.69
  -5  -1  -8  -32.10   21.70
   5   1   8    8.80   43.30
   5   1   8   59.19   46.50
   2  -2  -8    9.50   20.50
   2  -2  -8   38.00   25.20
  -2   2   8  -52.89   33.90
  -2   2   8  -86.89   64.49
   1  -2  -8   50.29   19.20
   1  -2  -8   55.09   53.69
   1  -2  -8   54.19   21.10
  -1   2   8   33.50   24.50
   0  -2  -8   84.49   37.80
   0  -2  -8   93.09   19.70
   0  -2  -8   59.29   21.10
   0  -2  -8   86.19   20.20
   0   2   8   66.59   20.40
   0   2   8   58.69   33.00
  -1  -2  -8 1303.67   91.59
  -1  -2  -8 1478.15   96.49
  -1  -2  -8 1429.26   93.99
  -1  -2  -8 1466.95   90.99
   1   2   8 1341.47   90.99
   1   2   8 1325.17   92.69
   1   2   8 1102.69  101.99
   1   2   8 1225.38  104.79
  -2  -2  -8 1739.13  116.19
  -2  -2  -8 1310.47  111.99
  -2  -2  -8 1699.23  108.99
  -2  -2  -8 1835.62  105.59
   2   2   8 1624.44  109.89
   2   2   8 1519.95  104.79
   2   2   8 1388.66  116.49
   2   2   8 1575.74  117.79
  -3  -2  -8   99.99   16.20
  -3  -2  -8  124.49   23.70
  -3  -2  -8   47.60   27.90
  -3  -2  -8   74.69   39.00
   3   2   8   98.39   33.40
   3   2   8   80.29   33.60
  -4  -2  -8   80.59   50.09
  -4  -2  -8  162.18   30.50
  -4  -2  -8  132.39   28.20
   4   2   8  111.29   37.40
   4   2   8  131.09   41.00
  -5  -2  -8   23.90   25.50
  -5  -2  -8   39.50   30.00
  -5  -2  -8   37.00   61.59
   5   2   8  -20.40   43.50
   5   2   8   45.00   45.40
   2  -3  -8   58.99   31.60
   2  -3  -8   60.89   28.40
  -2   3   8   -6.20   67.29
   1  -3  -8  425.86   43.60
   1  -3  -8  437.36   47.80
  -1   3   8  438.86   43.40
   0  -3  -8  537.45   69.89
   0  -3  -8  470.05   42.50
   0  -3  -8  487.85   52.79
   0   3   8  404.36   61.79
   0   3   8  494.55   42.40
  -1  -3  -8  170.98   31.80
  -1  -3  -8  145.89   22.20
  -1  -3  -8  118.49   25.60
  -1  -3  -8  183.68   36.50
   1   3   8   95.39   22.70
   1   3   8  106.69   32.60
   1   3   8  138.09   39.60
   1   3   8  148.99   23.50
  -2  -3  -8  -18.50   34.40
  -2  -3  -8   -5.40   14.30
  -2  -3  -8   14.10   21.50
   2   3   8    5.70   34.30
   2   3   8   -3.50   21.00
   2   3   8  -29.10   26.30
  -3  -3  -8   40.00   15.90
  -3  -3  -8  -33.40   24.70
  -3  -3  -8   20.40   41.00
   3   3   8   27.60   30.70
  -4  -3  -8  -40.00   49.10
  -4  -3  -8   -1.70   14.60
  -4  -3  -8  -21.60   28.40
   4   3   8   50.39   36.00
   4   3   8  -35.60   36.90
  -5  -3  -8   44.50   27.50
  -5  -3  -8   53.09   38.10
  -5  -3  -8   36.90   62.69
   5   3   8   53.19   46.80
   5   3   8   31.40   44.60
   1  -4  -8   29.70   29.80
   1  -4  -8  -28.10   23.20
   0  -4  -8   89.59   28.90
   0  -4  -8  -22.60   19.60
   0  -4  -8  -15.40   55.49
  -1  -4  -8   -8.00   26.60
  -1  -4  -8   11.60   38.10
  -1  -4  -8   20.40   19.60
  -1  -4  -8   66.49   36.50
   1   4   8    4.50   17.50
  -2  -4  -8  211.48   49.40
  -2  -4  -8  215.78   30.50
  -2  -4  -8  207.38   36.40
   2   4   8  252.17   35.40
   2   4   8  168.38   79.99
   2   4   8  143.89   39.70
  -3  -4  -8   70.69   52.39
  -3  -4  -8   57.79   30.30
  -3  -4  -8   23.00   19.30
   3   4   8   28.90   40.40
   3   4   8   47.50   32.50
  -4  -4  -8  110.59   58.89
  -4  -4  -8  144.09   24.40
  -4  -4  -8  107.09   41.60
   4   4   8  115.29   44.90
   4   4   8  134.79   44.10
   4   4   8  108.89   44.40
   0  -5  -8   35.80   35.20
   0  -5  -8  125.19   30.60
   0   5   8  110.39   46.60
  -1  -5  -8  322.47   63.19
  -1  -5  -8  317.17   64.29
  -1  -5  -8  265.87   47.00
  -1  -5  -8  378.26   42.70
   1   5   8  335.77   66.19
  -2  -5  -8  188.08   41.40
  -2  -5  -8  221.18   35.60
  -2  -5  -8  134.29   53.09
   2   5   8  221.18   53.19
   2   5   8  133.79   42.10
   2   5   8  166.48   30.10
  -3  -5  -8   40.30   59.69
  -3  -5  -8  264.87   47.70
  -3  -5  -8  205.28   31.80
   3   5   8  178.88   52.09
   3   5   8  169.78   43.10
   3   5   8  185.18   56.49
  -4  -5  -8  148.69   70.39
  -4  -5  -8   30.00   27.80
  -4  -5  -8   80.09   48.60
   4   5   8   18.10   51.79
   4   5   8   84.39   45.40
  -1  -6  -8   76.19   36.30
  -1  -6  -8  191.98   49.80
  -1  -6  -8   10.40   63.09
   1   6   8  121.09   49.80
  -2  -6  -8   17.10   31.20
  -2  -6  -8   40.70   47.30
   2   6   8   25.60   41.70
   2   6   8    5.20   52.29
   1   4  -9   51.99   35.10
   1   4  -9  144.39   59.79
   1   4  -9  102.29   27.70
  -1  -4   9   24.50   50.39
  -1  -4   9  209.28   87.79
   0   4  -9  -30.80   28.90
   0   4  -9   14.10   42.10
   0   4  -9  -14.10   19.30
   0  -4   9  -21.30   38.10
   0  -4   9   26.80   61.99
  -1   4  -9   51.49   45.60
  -1   4  -9  -13.10   27.20
   1  -4   9    0.40   34.40
   1  -4   9   72.99   52.39
  -2   4  -9   34.40   49.50
  -2   4  -9   39.20   30.90
   2  -4   9  -57.09   31.70
   2  -4   9  -50.89   57.99
   2  -4   9    3.20   45.10
  -3   4  -9   43.20   38.20
   3  -4   9   52.29   40.90
   3  -4   9   61.39   64.79
   3  -4   9    1.20   49.20
   1   3  -9   72.69   30.80
   1   3  -9  140.69   27.70
  -1  -3   9   99.29   77.19
  -1  -3   9  109.29   47.10
   0   3  -9  -22.50   32.80
   0   3  -9   22.40   47.60
   0   3  -9   64.89   20.70
   0   3  -9   36.90   26.10
   0  -3   9   46.00   36.50
  -1   3  -9  153.38   31.10
  -1   3  -9  228.48   25.40
  -1   3  -9  185.58   37.60
  -1   3  -9  188.88   31.00
   1  -3   9  139.09   55.19
   1  -3   9  113.89   34.00
  -2   3  -9    4.60   26.80
   2  -3   9  -62.89   28.00
   2  -3   9   57.79   38.30
   2  -3   9   -7.70   24.80
   2  -3   9   -5.10   49.80
  -3   3  -9   48.40   31.00
   3  -3   9   44.40   29.00
   3  -3   9  -64.69   53.89
   3  -3   9   42.70   43.40
   2   2  -9  214.08   39.60
   2   2  -9  289.57   42.50
  -2  -2   9  182.68   53.19
  -2  -2   9  262.67   91.19
   1   2  -9  237.68   34.20
   1   2  -9  258.67   37.90
  -1  -2   9  163.88   46.20
  -1  -2   9  110.99   62.79
  -1  -2   9  136.79   62.29
   0   2  -9    0.80   24.70
   0   2  -9  -36.30   16.90
   0  -2   9   11.00   39.10
   0  -2   9   56.89   59.59
   0  -2   9   -7.10   29.60
  -1   2  -9   38.20   24.80
  -1   2  -9   25.60   21.30
  -1   2  -9   70.09   27.90
  -1   2  -9   22.10   16.40
   1  -2   9  106.09   46.80
   1  -2   9   70.59   24.20
   1  -2   9   11.10   34.00
   1  -2   9   30.30   27.10
  -2   2  -9  166.08   21.50
  -2   2  -9  151.88   30.00
   2  -2   9  153.38   41.70
   2  -2   9  151.68   34.70
   2  -2   9  134.69   46.30
  -3   2  -9 1085.49   90.69
  -3   2  -9 1056.59   78.29
   3  -2   9 1049.40   88.19
   3  -2   9 1008.40   97.29
   3  -2   9  875.71   80.99
  -4   2  -9  434.56   66.89
  -4   2  -9  340.37   48.20
   4  -2   9  319.97   52.89
   4  -2   9  230.68   60.99
   4  -2   9  390.86   66.39
   2   1  -9   92.59   31.10
   2   1  -9  -28.60   21.30
   2   1  -9    2.10   23.40
  -2  -1   9  -10.40   78.09
  -2  -1   9   56.69   45.30
   1   1  -9    7.40   22.30
   1   1  -9    0.60   18.60
   1   1  -9   21.40   18.30
  -1  -1   9  -77.19   52.59
  -1  -1   9   26.90   45.60
  -1  -1   9    0.60   34.70
   0   1  -9  301.47   32.40
   0   1  -9  279.67   34.30
   0  -1   9  350.16   57.39
   0  -1   9  186.38   51.69
   0  -1   9  253.57   43.40
  -1   1  -9  263.97   50.49
  -1   1  -9  264.87   28.90
   1  -1   9  287.47   48.90
   1  -1   9  348.97   34.50
   1  -1   9  254.37   42.60
   1  -1   9  218.58   53.69
   1  -1   9  354.96   62.29
  -2   1  -9  365.96   50.49
  -2   1  -9  329.57   30.80
  -2   1  -9  439.66   47.30
  -2   1  -9  438.66   41.70
   2  -1   9  259.87   55.89
   2  -1   9  309.17   58.89
   2  -1   9  325.17   55.19
   2  -1   9  333.47   34.20
  -3   1  -9    9.60   19.20
  -3   1  -9    7.70   24.80
  -3   1  -9    8.50   12.60
  -3   1  -9  -32.90   34.90
   3  -1   9   10.90   16.70
   3  -1   9   46.30   41.90
   3  -1   9  -37.80   34.20
   3  -1   9   41.20   25.20
  -4   1  -9   23.50   47.40
  -4   1  -9   92.69   38.80
   4  -1   9   61.59   42.30
   4  -1   9  -28.80   32.50
   4  -1   9  -11.20   46.10
   2   0  -9  134.99   30.50
   2   0  -9  129.29   29.10
  -2   0   9   92.89   43.00
  -2   0   9   11.50   77.89
   1   0  -9   46.30   19.90
   1   0  -9  -16.50   20.60
  -1   0   9    6.40   33.60
   0   0  -9   66.19   20.30
   0   0  -9   28.70   32.80
   0   0   9   56.89   28.90
   0   0   9   36.00   41.00
  -1   0  -9   24.50   30.90
  -1   0  -9   24.10   16.40
  -1   0  -9   39.10   39.20
  -1   0  -9   29.70   17.20
   1   0   9   28.30   19.00
   1   0   9   -0.30   37.10
   1   0   9   15.10   32.30
   1   0   9   46.30   25.50
  -2   0  -9   -0.60   16.40
  -2   0  -9   13.70   30.90
  -2   0  -9   24.40   13.90
  -2   0  -9   -5.10   17.70
  -2   0  -9   39.80   27.40
   2   0   9   13.80   38.60
   2   0   9   58.89   16.90
   2   0   9   33.50   25.00
   2   0   9   39.00   31.30
  -3   0  -9   -0.70   24.10
  -3   0  -9    0.10   16.20
  -3   0  -9    1.40   23.30
   3   0   9   36.50   33.00
   3   0   9   32.00   24.90
   3   0   9   17.20   16.20
   3   0   9   -5.60   38.90
  -4   0  -9   33.60   44.00
  -4   0  -9   23.80   17.80
  -4   0  -9  -53.39   25.10
   4   0   9   27.10   33.20
   4   0   9  -93.89   40.50
   4   0   9   47.20   40.00
   5   0   9   39.00   53.59
   2  -1  -9  241.78   35.80
   2  -1  -9  254.47   40.40
  -2   1   9  219.78   49.30
  -2   1   9  196.88   85.49
   1  -1  -9    7.00   21.50
   1  -1  -9   31.40   20.70
   1  -1  -9  102.39   64.99
  -1   1   9   15.70   31.80
   0  -1  -9  266.47   36.70
   0  -1  -9  331.07   58.69
   0  -1  -9  421.86   36.20
   0   1   9  299.97   55.79
   0   1   9  322.47   44.00
  -1  -1  -9    7.30   17.60
  -1  -1  -9   22.30   14.70
  -1  -1  -9   33.00   28.80
   1   1   9   -3.90   22.80
   1   1   9   17.00   20.00
  -2  -1  -9  102.09   37.30
  -2  -1  -9   77.99   20.40
  -2  -1  -9   75.89   17.00
   2   1   9   73.79   34.10
   2   1   9   94.59   25.60
   2   1   9   89.99   20.20
  -3  -1  -9   82.09   15.90
  -3  -1  -9   52.29   37.50
  -3  -1  -9   67.89   29.40
  -3  -1  -9   60.99   20.10
   3   1   9   93.89   57.79
   3   1   9   22.60   16.30
   3   1   9   96.89   43.10
  -4  -1  -9  -37.70   43.30
  -4  -1  -9   44.20   25.20
  -4  -1  -9   96.49   27.30
  -4  -1  -9   19.10   22.00
   4   1   9   21.50   42.90
   4   1   9    9.10   41.20
  -5  -1  -9   47.90   33.50
  -5  -1  -9   44.70   25.40
  -5  -1  -9   61.79   61.79
   5   1   9  -27.70   51.79
   5   1   9  109.69   55.99
   1  -2  -9  119.79   29.10
   1  -2  -9  155.78   73.29
   1  -2  -9  240.58   36.00
  -1   2   9  110.19   35.30
   0  -2  -9   -5.80   19.20
   0  -2  -9   16.40   45.60
   0  -2  -9  -23.10   20.30
   0   2   9  -20.90   24.00
   0   2   9   -6.00   39.10
  -1  -2  -9  164.88   34.60
  -1  -2  -9  189.88   33.90
  -1  -2  -9  205.88   29.40
  -1  -2  -9  181.98   33.30
   1   2   9  254.67   49.00
   1   2   9  161.58   29.40
   1   2   9  227.98   45.70
  -2  -2  -9   36.40   17.30
  -2  -2  -9   39.00   25.10
  -2  -2  -9   60.99   35.70
   2   2   9   77.49   21.50
   2   2   9   49.99   35.60
   2   2   9   28.00   40.00
   2   2   9   38.30   23.90
  -3  -2  -9  -21.40   23.10
  -3  -2  -9   -2.90   42.00
  -3  -2  -9   10.70   16.40
   3   2   9   -3.40   38.90
   3   2   9   67.79   29.40
   3   2   9   10.30   34.20
  -4  -2  -9   16.20   34.20
  -4  -2  -9   39.00   50.39
   4   2   9  -15.30   41.20
   4   2   9  -42.10   40.90
   1  -3  -9  -18.80   27.80
   1  -3  -9    7.30   24.10
  -1   3   9   -7.80   30.40
   0  -3  -9   35.80   22.20
   0  -3  -9  166.18   58.09
   0  -3  -9   30.00   27.80
   0   3   9   -9.30   42.20
   0   3   9   58.59   25.70
  -1  -3  -9   40.20   20.20
  -1  -3  -9   25.90   26.10
  -1  -3  -9  -24.90   35.00
  -1  -3  -9   98.99   32.20
   1   3   9   53.49   41.00
   1   3   9   40.00   23.40
   1   3   9   20.10   42.90
  -2  -3  -9    5.90   24.80
  -2  -3  -9   46.10   19.10
  -2  -3  -9  113.09   43.50
   2   3   9   58.99   44.50
   2   3   9   57.39   27.00
   2   3   9   43.40   37.10
  -3  -3  -9   12.80   18.90
  -3  -3  -9   30.50   27.50
   3   3   9   72.79   44.60
   3   3   9   24.90   38.90
   3   3   9   26.20   29.00
  -4  -3  -9   13.70   19.20
  -4  -3  -9   91.79   61.69
  -4  -3  -9  -22.10   32.00
   4   3   9   29.40   42.10
   4   3   9   54.39   45.20
   0  -4  -9   51.79   33.90
   0  -4  -9    4.20   23.30
   0   4   9  -49.90   45.70
   0   4   9    9.90   25.30
  -1  -4  -9  -13.40   24.10
  -1  -4  -9   93.29   47.40
  -1  -4  -9   43.50   29.50
   1   4   9   28.30   22.40
   1   4   9  -36.20   42.00
   1   4   9   71.49   48.60
  -2  -4  -9  198.38   33.80
  -2  -4  -9   85.29   34.40
  -2  -4  -9  251.97   58.09
   2   4   9  136.19   49.80
   2   4   9  144.89   30.00
   2   4   9  131.79   44.20
  -3  -4  -9  424.66   79.59
  -3  -4  -9  452.45   43.20
  -3  -4  -9  372.26   54.99
   3   4   9  257.87   55.89
   3   4   9  451.55   54.39
   3   4   9  250.67   58.59
  -4  -4  -9  501.15   63.09
  -4  -4  -9  493.45   93.49
  -4  -4  -9  307.37   44.50
   4   4   9  497.05   75.19
   4   4   9  406.06   76.79
  -1  -5  -9  335.77   46.60
  -1  -5  -9  249.58   47.80
   1   5   9  257.47   56.89
  -2  -5  -9  595.54   69.39
  -2  -5  -9  517.95   89.39
  -2  -5  -9  543.45   56.49
   2   5   9  474.05   51.89
   2   5   9  622.94   86.09
   2   5   9  386.36   74.89
  -3  -5  -9  207.38   76.89
  -3  -5  -9  171.28   49.99
  -3  -5  -9  269.17   44.60
   3   5   9  135.59   49.60
   3   5   9  294.77   53.69
   3   5   9  149.19   61.09
   0   3 -10  167.88   33.10
   0   3 -10  154.68   37.60
   0   3 -10  142.89   42.50
   0  -3  10   63.19   70.99
   0  -3  10  136.29   48.40
  -1   3 -10  194.48   30.20
  -1   3 -10  197.28   36.70
   1  -3  10  159.58   62.79
   1  -3  10   56.49   56.59
   1  -3  10  143.69   42.10
  -2   3 -10  386.36   50.69
   2  -3  10  351.76   62.89
   2  -3  10  364.86   72.69
   2  -3  10  312.87   58.79
   1   2 -10   43.30   32.30
  -1  -2  10  143.49   92.59
  -1  -2  10  171.28   51.19
   0   2 -10  911.31   71.79
   0   2 -10 1019.40   80.29
   0   2 -10  928.81   75.89
   0  -2  10  840.72   88.99
  -1   2 -10  217.08   42.50
  -1   2 -10  229.78   39.80
  -1   2 -10  160.68   32.50
   1  -2  10  237.68   55.89
   1  -2  10  199.58   65.59
   1  -2  10  167.58   39.30
  -2   2 -10   45.20   18.90
  -2   2 -10    1.30   28.20
   2  -2  10   45.40   46.50
   2  -2  10   -1.20   35.00
   2  -2  10  -43.90   58.39
  -3   2 -10   65.79   50.09
  -3   2 -10   21.60   33.40
   3  -2  10  -50.29   45.60
   3  -2  10   87.39   63.99
   3  -2  10   20.90   36.00
   1   1 -10   67.89   31.30
   1   1 -10  115.39   28.20
  -1  -1  10  135.19   78.09
  -1  -1  10  192.88   49.60
   0   1 -10   22.40   28.50
   0   1 -10  -15.40   20.00
   0  -1  10    7.50   45.00
   0  -1  10   38.50   36.00
   0  -1  10  -20.80   56.39
  -1   1 -10   48.90   27.80
  -1   1 -10   24.70   18.80
   1  -1  10   71.79   32.20
   1  -1  10  -24.10   53.09
   1  -1  10   36.90   42.60
  -2   1 -10   -2.60   17.30
  -2   1 -10   34.90   46.00
  -2   1 -10   17.90   32.70
  -2   1 -10   -9.50   26.60
   2  -1  10  -21.50   22.90
   2  -1  10    8.20   41.80
   2  -1  10  -18.40   54.59
  -3   1 -10   86.79   19.10
  -3   1 -10   98.09   47.40
  -3   1 -10  110.59   31.10
   3  -1  10   57.89   35.00
   3  -1  10   40.60   54.99
   3  -1  10   99.79   43.60
  -4   1 -10   67.49   51.69
  -4   1 -10  -42.60   35.10
   4  -1  10  -14.20   57.99
   4  -1  10  -53.39   48.10
   4  -1  10   13.00   37.90
   1   0 -10   45.80   22.60
   1   0 -10   51.19   24.90
  -1   0  10   33.80   42.70
  -1   0  10   52.79   69.59
   0   0 -10  127.09   25.40
   0   0  10  173.68   39.30
   0   0  10  140.49   53.99
  -1   0 -10  217.58   32.30
  -1   0 -10  241.88   33.90
   1   0  10  234.88   61.29
   1   0  10  217.28   48.90
   1   0  10  156.38   35.70
  -2   0 -10    8.00   20.80
  -2   0 -10   78.69   38.50
  -2   0 -10   14.30   22.90
   2   0  10   28.30   49.70
   2   0  10    4.30   21.50
   2   0  10   11.40   41.20
   2   0  10  -40.90   29.00
  -3   0 -10  135.49   29.90
  -3   0 -10  146.09   33.20
  -3   0 -10  118.49   44.20
  -3   0 -10   62.59   22.90
   3   0  10   65.79   53.59
   3   0  10  131.19   36.80
   3   0  10   70.29   45.80
  -4   0 -10  269.47   33.50
  -4   0 -10  240.48   58.29
  -4   0 -10  191.48   40.60
   4   0  10  273.97   49.00
   4   0  10  271.97   62.49
   4   0  10  180.38   54.99
   1  -1 -10  427.96   47.30
   1  -1 -10  343.77   47.50
   0  -1 -10   41.70   25.60
   0  -1 -10    1.30   20.40
   0   1  10   13.70   33.50
   0   1  10  -11.90   47.90
  -1  -1 -10   60.79   23.60
  -1  -1 -10   40.00   37.00
  -1  -1 -10   44.90   21.40
   1   1  10   38.90   44.60
   1   1  10    3.70   29.20
   1   1  10  -81.29   51.59
  -2  -1 -10  265.37   33.30
  -2  -1 -10  264.17   53.09
  -2  -1 -10  318.97   36.80
   2   1  10  214.08   42.30
   2   1  10  179.58   55.99
   2   1  10  226.88   32.60
   2   1  10  255.97   50.79
  -3  -1 -10  248.88   53.09
  -3  -1 -10  192.88   37.30
   3   1  10  258.37   43.90
   3   1  10  251.97   49.80
   3   1  10  115.59   52.89
  -4  -1 -10  588.84   51.99
  -4  -1 -10  414.16   54.69
   4   1  10  469.45   84.09
   4   1  10  564.84   66.59
   4   1  10  548.95   81.89
   0  -2 -10  145.29   29.20
   0  -2 -10   64.39   29.10
   0   2  10  129.89   52.79
   0   2  10  158.78   37.30
  -1  -2 -10   -6.00   38.30
  -1  -2 -10   33.20   25.30
  -1  -2 -10    4.70   21.00
   1   2  10  -15.80   42.40
   1   2  10   25.40   43.20
   1   2  10   26.40   27.40
  -2  -2 -10   55.29   44.40
  -2  -2 -10   81.59   26.40
  -2  -2 -10   45.10   20.70
   2   2  10   41.10   30.60
   2   2  10   19.40   45.60
   2   2  10   94.99   45.40
  -3  -2 -10   33.30   19.70
  -3  -2 -10   21.50   48.90
  -3  -2 -10   59.49   27.30
   3   2  10   78.99   45.40
   3   2  10   37.10   50.39
   3   2  10   55.49   34.60
  -4  -2 -10   24.50   33.80
  -4  -2 -10   73.99   57.89
   4   2  10  -42.20   56.09
   4   2  10   52.09   40.50
   4   2  10   57.79   50.19
   0  -3 -10   56.39   32.70
   0  -3 -10  132.49   33.10
   0   3  10   92.29   36.00
   0   3  10  144.79   57.49
  -1  -3 -10   22.90   42.60
  -1  -3 -10  -26.50   24.60
  -1  -3 -10  -19.50   28.80
   1   3  10  -26.80   27.60
   1   3  10   28.10   57.49
   1   3  10  -81.99   44.10
  -2  -3 -10   56.49   25.90
  -2  -3 -10   21.80   46.60
  -2  -3 -10   51.79   31.10
   2   3  10   -2.90   29.80
   2   3  10   88.99   54.19
   2   3  10  -52.69   43.70
  -3  -3 -10   96.39   58.79
  -3  -3 -10   37.30   33.70
  -3  -3 -10   -6.40   24.60
   3   3  10   60.19   46.20
   3   3  10  -50.19   36.50
   3   3  10   84.29   53.69
  -1  -4 -10  148.49   40.80
  -1  -4 -10   88.29   28.70
   1   4  10   38.20   30.40
   1   4  10  138.99   53.69
  -2  -4 -10   16.10   34.20
  -2  -4 -10  -17.10   27.60
  -2  -4 -10   31.10   63.39
   2   4  10   87.59   61.99
   2   4  10  -20.50   31.20
   2   4  10  -17.80   51.09
  -1   1 -11   73.09   31.20
  -1   1 -11   63.09   25.10
   1  -1  11   93.79   63.29
   1  -1  11   41.90   60.49
   1  -1  11   -5.20   37.60
  -2   1 -11  -14.50   34.60
  -2   1 -11   23.00   23.30
   2  -1  11   53.49   70.59
   2  -1  11   99.29   42.80
   2  -1  11  -77.99   51.09
  -1   0 -11    5.00   23.90
  -1   0 -11  -15.80   24.60
  -1   0 -11   15.70   25.60
   1   0  11   -9.20   36.70
   1   0  11   19.50   52.29
   1   0  11   46.90   56.49
  -2   0 -11  916.71   92.19
  -2   0 -11 1007.20   79.19
  -2   0 -11  963.10   72.79
   2   0  11  859.91   84.99
   2   0  11  846.82  109.99
  -3   0 -11  116.49   28.50
  -3   0 -11  154.08   55.89
  -3   0 -11  153.58   37.80
   3   0  11   64.19   66.59
   3   0  11  108.39   41.20
   3   0  11  211.08   57.99
   1   1  11  212.58   68.49
   1   1  11  147.59   42.40
   1   1  11  143.09   56.79
  -2  -1 -11   27.40   27.90
  -2  -1 -11   74.79   75.79
  -2  -1 -11   37.10   28.60
   2   1  11   60.09   55.29
   2   1  11   85.19   63.79
   2   1  11   37.70   37.90
  -3  -1 -11   79.09   56.89
  -3  -1 -11   79.89   30.20
  -3  -1 -11  -15.00   28.90
   3   1  11   18.90   38.40
   3   1  11    9.90   50.89
   3   1  11   58.29   65.69
  -1  -2 -11  107.39   50.59
  -1  -2 -11   -8.30   26.00
   1   2  11   58.69   38.20
   1   2  11    7.40   64.09
   1   2  11  -39.60   56.09
  -2  -2 -11  123.79   34.00
  -2  -2 -11  114.59   67.69
  -2  -2 -11  186.88   32.00
   2   2  11  178.68   59.09
   2   2  11  141.89   42.30
   2   2  11  253.47   68.49
   0   0   0    0.00    0.00

_computing_structure_solution     'SHELXT 2014/5 (Sheldrick, 2014)'
;
_shelx_hkl_checksum   28011

_publcif_info_exptl_table_max_cols 4
_publcif_info_exptl_table_use_headnotes n

loop_
_publcif_info_datablock.id
_publcif_info_datablock.publ_exptl
_publcif_info_datablock.publ_geom
_publcif_info_datablock.structure
'{60555ba9-acce-4048-b7e6-86ad8acf89ab}' y y y

loop_
_publcif_info_exptl_table_extra_item
sin_theta_over_lambda_max

loop_
_publcif_info_exptl_table_header_item
?

loop_
_publcif_info_tables.block_id
_publcif_info_tables.reference_item
"{60555ba9-acce-4048-b7e6-86ad8acf89ab}" "_publcif_info_datablock.publ_exptl"

loop_
_publcif_info_cif.paper_type
 EX


_publcif_funding_html
;
;
